# Supplementary material for: Impact of isolation on hospitalised patients who are infectious: systematic review with meta-analysis
Source: PubMed Central journal article supplement — BMJ Open. 2020 Feb 18;10(2):e030371. doi: 10.1136/bmjopen-2019-030371 (PMC7044903; doi:10.1136/bmjopen-2019-030371), 2020-02-18
Supplement: bmjopen-2019-030371.draft_revisions.pdf [file bmjopen-2019-030371.draft_revisions.pdf]

# BMJ Open

BMJ Open is committed to open peer review. As part of this commitment we make the peer review history of every article we publish publicly available.

When an article is published we post the peer reviewers' comments and the authors' responses online. We also post the versions of the paper that were used during peer review. These are the versions that the peer review comments apply to.

The versions of the paper that follow are the versions that were submitted during the peer review process. They are not the versions of record or the final published versions. They should not be cited or distributed as the published version of this manuscript.

BMJ Open is an open access journal and the full, final, typeset and author-corrected version of record of the manuscript is available on our site with no access controls, subscription charges or pay-per-view fees (<http://bmjopen.bmj.com>).

If you have any questions on BMJ Open's open peer review process please email [info.bmjopen@bmj.com](mailto:info.bmjopen@bmj.com)

# BMJ Open

## Impact of isolation on hospitalised patients who are infectious: systematic review with quantitative analysis

|                               |                                                                                                                                                                                                                                                              |
|-------------------------------|--------------------------------------------------------------------------------------------------------------------------------------------------------------------------------------------------------------------------------------------------------------|
| Journal:                      | <i>BMJ Open</i>                                                                                                                                                                                                                                              |
| Manuscript ID                 | bmjopen-2019-030371                                                                                                                                                                                                                                          |
| Article Type:                 | Research                                                                                                                                                                                                                                                     |
| Date Submitted by the Author: | 13-Mar-2019                                                                                                                                                                                                                                                  |
| Complete List of Authors:     | Pursell, Edward; City, University of London, School of Health Sciences<br>Gould, Dinah; Cardiff University School of Healthcare Studies, ; Cardiff University, Healthcare Sciences<br>Chudleigh, Jane; City, University of London, School of Health Sciences |
| Keywords:                     | Infection control < INFECTIOUS DISEASES, Anxiety disorders < PSYCHIATRY, Quality in health care < HEALTH SERVICES ADMINISTRATION & MANAGEMENT                                                                                                                |
|                               |                                                                                                                                                                                                                                                              |

SCHOLARONE™  
Manuscripts

1  
2  
3 **Impact of isolation on hospitalised patients who are infectious: systematic review**  
4  
5 **with quantitative analysis**  
6  
7  
8  
9

10 Edward Pursell RN PhD (corresponding author)

11 Senior Lecturer

12 School of Health Sciences

13 City, University of London

14 1 Myddelton Street

15 London EC1R 1UW.

16 Telephone 020 7040 5955

17 Fax: N/A

18 email [Edward.pursell@city.ac.uk](mailto:Edward.pursell@city.ac.uk)

19  
20  
21  
22  
23  
24  
25  
26  
27  
28  
29  
30  
31  
32  
33 Professor Dinah Gould RN PhD

34 Professor of Nursing

35 Cardiff School of Health Care Sciences

36 Cardiff University

37 Cardiff

38  
39  
40  
41  
42  
43  
44  
45  
46  
47 Jane Chudleigh

48 School of Health Sciences

49 City, University of London

50 London

51  
52  
53  
54  
55  
56  
57  
58 Word count, excluding title page, abstract, references, figures and tables: 2 289

59 Data availability statement: No additional data available

1  
2  
3 **Impact of isolation on hospitalised patients who are infectious: systematic review**  
4  
5 **with quantitative analysis**  
6  
7  
8  
9

10 **Abstract**  
11  
12  
13

14 Objective

15  
16 To systematically review the literature exploring impact of isolation on hospitalised  
17 patients who are infectious: psychological and non-psychological outcomes  
18  
19  
20  
21  
22

23 Design

24 Systematic review with quantification  
25  
26  
27  
28  
29

30 Data Sources

31  
32 Embase, Medline and Psychinfo were searched from inception until December 2018.  
33  
34 Reference lists and Google Scholar were also handsearched.  
35  
36  
37  
38  
39

40 Results

41  
42 Twenty seven papers published from database inception until December 2018 were  
43 reviewed. A wide range of psychological and non-psychological outcomes were  
44 reported. There was a marked trend for isolated patients to exhibit higher risk of  
45 depression, anxiety and worse outcomes for a range of care-related factors but with  
46 significant variation.  
47  
48  
49  
50  
51  
52  
53  
54  
55  
56  
57  
58  
59  
60

## Conclusion

The review indicates that isolation to contain risk of infection has negative consequences for segregated patients. Although strength of the evidence is weak, comprising primarily single centre convenience samples, consistency of the effects may strengthen this conclusion. More research needs to be undertaken to examine this relationship and develop and test interventions to reduce the negative effects of isolation.

## Strengths and limitations of this study

- The isolation of those with infectious disease is common, and in the age of increased antimicrobial resistance may become more common and important.
- It is important to examine both psychological and non-psychological outcomes associated with isolation.
- This is a methodologically challenging area to examine, however consistency in the body of evidence might increase confidence in the findings.
- It is not known if any effects are temporary or how long they last.

## Funding statement

This research received no specific grant from any funding agency in the public, commercial or not-for-profit sectors

## A competing interests statement

No authors have any competing interests to declare

## Introduction

Isolation is an established part of any infection prevention programme. Its purpose is to prevent the transmission of antibiotic-resistant pathogens, those that are highly contagious or cause serious infection.[1] The effectiveness of isolation has been questioned however [2–5] and it can be challenging to undertake, especially if patients' lack of understanding of the need for segregation, boredom or distress result in uncooperative behaviour. [6] Although single rooms are assumed to reduce infection risk, evidence of ability to contain spread is equivocal [7,8] and a recent study conducted in an all-single-room hospital was unable to demonstrate lower infection rates than in hospitals where most care takes place in open wards. [9] This study identified advantages and disadvantages of single room accommodation, whereas isolating infectious patients is generally assumed to result in adverse outcomes.[10]

A systematic review reported eight years ago indicated higher levels of anxiety, depression, perceptions of stigmatisation and a higher incidence of falls, medication errors and other incidents that detract from patient safety among patients who were isolated compared to those who were not.[11] This review reported studies undertaken before 2010 and included patients whose experiences are unlikely to be comparable: children and adults and those isolated to reduce their own risk of infection as well as infectious patients. The review was not reported according to standards currently expected for systematic reviews [12] and presents a qualitative description of patient outcomes only. A more rigorous and up-to-date systematic review is indicated in view of increasing concern about satisfaction with health care and patient safety and

1  
2  
3 increasing emphasis on infection prevention as part of the global strategy to reduce  
4 risks of antimicrobial resistance.[13]  
5  
6  
7  
8  
9

10 We undertook a systematic review of the literature to establish the effects of infection  
11 related isolation on psychological and non-psychological care-related outcomes in  
12 adults. This review is therefore more focussed than that previously undertaken which  
13 also included those in protective isolation, and contains a significant body of literature  
14 published since 2010.  
15  
16  
17  
18  
19  
20  
21  
22

### 23 **Method**

24 The eligibility criteria for inclusion was that studies should compare psychological or  
25 non-psychological outcomes in adult patients who are in infective isolation with those  
26 not isolated. Purely symptomatic/disease progression outcomes were not included,  
27 neither were those looking at those isolated due to immunosuppression. Studies not  
28 containing comparative data were also excluded. Information sources were Embase,  
29 Medline and Psychinfo, which were searched from inception until December 2018.  
30 Reference lists and Google Scholar were also handsearched. Full details of the search  
31 and PRISMA flow-chart together with excluded papers are given in the  
32 supplementary information. No protocol was published in advance.  
33  
34  
35  
36  
37  
38  
39  
40  
41  
42  
43  
44  
45  
46  
47  
48

49 Where available raw data were extracted and entered into a spreadsheet, and  
50 depending upon the nature of the data either the relative risk or standardised mean  
51 difference calculated. Results were then presented as forest plots. All calculations  
52 and plots were produced using the meta package in R.[14,15] Where raw data were  
53 not provided the summary results are given in the text but not the forest plots. Due to  
54  
55  
56  
57  
58  
59  
60

1  
2  
3 the variety of different settings and methods it was deemed that the methodological  
4 and clinical heterogeneity was too broad to pool results; in particular outcomes were  
5 measured in a variety of different ways.  
6  
7  
8  
9

## 10 11 12 Patient and Public Involvement

13  
14 As a secondary analysis patients and public were not involved in this work  
15  
16

## 17 18 19 **Results**

20  
21 A total of 3 879 papers were retrieved from the three databases; 39 of which were  
22 screened and 12 excluded, leaving 26 in the final analysis. Of these 13 studies  
23 provided data suitable for the calculation of relative risks, 5 giving psychological  
24 outcomes,[16–20] and 12 non-physiological:[18,21–31] and 8 provided data for the  
25 calculation of standardised mean differences, 6 giving psychological  
26 outcomes,[20,29,32–35] and 3 non-psychological.[25,28,36] A further 6 studies did  
27 not provide raw data but are included in the results; 3 each giving psychological  
28 outcomes[37–39] and non-psychological outcomes.[16,40,41]  
29  
30  
31  
32  
33  
34  
35  
36  
37  
38  
39  
40  
41

42 As it had been decided not to attempt statistical pooling of study results, the data from  
43 studies are shown as forest plots but without meta-analysis. The forest plots contain  
44 results from the studies where sufficient data were given to calculate either the  
45 relative risk or standardised mean difference. A number of studies provided data on  
46 those under contact precautions, but no comparative data and so were not  
47 included.[42–45]  
48  
49  
50  
51  
52  
53  
54  
55  
56  
57  
58  
59  
60



1  
2  
3 Because of the large number of non-psychological outcomes for which RR could be  
4  
5 calculated, it was decided that a change of 20% (i.e. a RR of 0.8 or less, or 1.2 or  
6  
7 more) would be clinically significant, regardless of the statistical significance.  
8  
9

10 Results are shown in Figures 1 to 5. Figure 5 contains results that did not meet our  
11  
12 criteria for being clinically significant (see supplemental information).  
13  
14

15  
16  
17 The studies included were primarily single-centre and consisted of case-control,  
18  
19 cross-sectional and cohort studies. Although these studies have limited  
20  
21 generalisability, there did not appear to be significant cause for concern regarding bias  
22  
23 within the limitation inherent in these study designs. Full details of each study is  
24  
25 given in the supplementary information.  
26  
27

28  
29  
30 The data from the comparative studies suggest that although in many cases contact  
31  
32 precautions makes little difference to psychological outcomes, where it does make a  
33  
34 difference this is primarily negative. There were significant declines in mean scores  
35  
36 related to control and self-esteem, and in many studies increases in the mean scores  
37  
38 for risk of anxiety and depression. However, these findings were not consistent, and  
39  
40 some larger studies showed little or no difference between the groups for these  
41  
42 outcomes. These are shown in Figures 1 and 2 respectively.  
43  
44  
45  
46  
47  
48

49 [INSERT FIGURES 1 and 2 HERE]  
50  
51  
52

53 Figure 1. Relative risk of psychological events in those isolated versus not isolated  
54  
55  
56  
57  
58  
59  
60

1  
2  
3 Figure 2. Standardised mean difference of psychological scores in those isolated  
4  
5 versus those not isolated  
6  
7  
8  
9

10 Studies not reporting the raw data showed that contact precautions were associated  
11 with depression OR 1.4 (95% CI 1.2 to 1.5) but not anxiety OR 0.8 (95% CI 0.7 to  
12 1.1) in a non-ICU population.[40] There was also an association with delirium OR,  
13 1.40 (95% CI 1.24 to 1.51); although this was primarily among those who were newly  
14 diagnosed as needing isolation OR, 1.75 (95% CI 1.60 to 1.92,  $p<0.01$ ) rather than  
15 those who had been under contact precautions for their entire stay OR 0.97 (95% CI  
16 0.86 to 1.09,  $p=0.60$ ).[16] Another study showed no difference in the median values  
17 for the Hospital Anxiety and Depression Scale anxiety or depression scores (HADS-A  
18 and -D), or the EuroQol Visual Analogue Scale EQ VAS scores.[41]  
19  
20  
21  
22  
23  
24  
25  
26  
27  
28  
29  
30  
31  
32

33 For non-psychological outcomes, using a difference in the risk of +/- 20% of an event  
34 as being a measure of clinical significance it appears there was a trend for less  
35 attention to be given to, and for more errors to occur in those who were isolated.  
36  
37 However, again there was wide variation between studies. Data on these outcomes  
38 are given in Figures 3 and 4, and the non-clinically significant risks in the  
39 supplementary information (Figure 5).  
40  
41  
42  
43  
44  
45  
46  
47  
48

49 [INSERT FIGURES 3 and 4 HERE]  
50  
51  
52  
53

54 Figure 3. Relative risk of non-psychological events in those isolated versus not  
55 isolated  
56  
57  
58  
59  
60

1  
2  
3 Figure 4. Standardised mean difference of non-psychological scores in those isolated  
4 versus those not isolated  
5  
6  
7  
8  
9  
10  
11

12 A study not giving raw data which looked at the rates of falls and pressure ulcers  
13 before and after a policy change that resulted in the discontinuation of contact  
14 precautions for patients with methicillin resistant *Staphylococcus aureus* (MRSA) or  
15 vancomycin resistant enterococci (VRE) found that falls and pressure ulcers were  
16 more common among those with MRSA or VRE both before the change (when they  
17 were in isolation) and afterwards (when they were not). Before the change the number  
18 of falls was 4.57 vs 2.04 per 1000 patient-days respectively ( $p < 0.0001$ ) and pressure  
19 ulcers 4.87 vs 1.22 per 1000 patient-days ( $p < 0.0001$ ). After the policy change the  
20 same numbers were falls 4.82 vs 2.10 ( $p < 0.0001$ ) and pressure ulcers 4.17 vs 1.19 per  
21 1000 patient-days ( $p < 0.0001$ ).[38] Other studies found that staff spent less time with  
22 those on contact precautions: internal medicine interns spent less time with their  
23 isolated patients compared to non-isolated patients, the median times being 5.2 and  
24 6.9 minutes respectively ( $p < 0.001$ )[37]; while the mean number of contacts per hour  
25 with healthcare workers was 2.1 compared to 4.2 in those not isolated ( $p = 0.03$ ),  
26 although the duration was longer at 4.5 minutes compared to 2.8 ( $p = 0.6$ ).[39]  
27  
28  
29  
30  
31  
32  
33  
34  
35  
36  
37  
38  
39  
40  
41  
42  
43  
44  
45  
46  
47  
48

49 **Discussion**  
50

51 Current recommendations say that contact precautions should include a single room,  
52 with personal protective equipment consisting of a gown and gloves for all patient  
53 contacts or contacts with potentially contaminated environmental areas.[1] This  
54 review has shown that there are a number of apparently negative aspects to contact  
55  
56  
57  
58  
59  
60

1  
2  
3 precautions, in particular with regards to psychological effects and a reduction in the  
4 quality of some aspects of care. These data come from studies carried out in a variety  
5 of countries and different types of facility; although there are few data from  
6 particularly vulnerable populations such as the elderly.  
7  
8  
9  
10  
11  
12  
13

14 Although at times there are discussions as to the necessity of contact precautions for  
15 drug resistant organisms, with some arguing that there is mixed evidence for or  
16 against their use[46] another recent review has concluded that they are of great  
17 importance in the control of epidemic and endemic multidrug-resistant  
18 microorganisms.[47] The ethics of using contact precautions and other forms of  
19 isolation rely on a positive assessment of the balance between the risks and benefits of  
20 this to the individual concerned and that of the broader population of patients and  
21 staff.[48] However, even when this assessment is positive, it is important to ensure  
22 that any harm to the individual is minimised.  
23  
24  
25  
26  
27  
28  
29  
30  
31  
32  
33  
34  
35  
36  
37

38 One way of balancing the various priorities is to use the GRADE Evidence to  
39 Decision Framework, which provides criteria for making recommendations at the  
40 individual, group and policy-levels, and provides a number of highly patient focussed  
41 criteria for doing this. In addition to the certainty of evidence and resource  
42 requirements, it also requires consideration of: the balance of desirable and  
43 undesirable effects; the impact upon equity; and the feasibility and acceptability of the  
44 intervention.[49] The last two of these might have very different outcomes when  
45 considered at the population and individual levels; and there is certainly evidence here  
46 that for the individual patient the balance of desirable and undesirable effects might  
47 be very different to that of the broader population.  
48  
49  
50  
51  
52  
53  
54  
55  
56  
57  
58  
59  
60

1  
2  
3  
4  
5  
6 However, within the broad population of infected or potentially infected patients,  
7  
8 some groups might have different needs. For example a study of people isolated for  
9  
10 MERS found that while access to telephones reduced anxiety and anger; access to  
11  
12 email, text and internet increased these.[50] This was not an area investigated in any  
13  
14 depth in these studies. Another area where information may be lacking is that of age,  
15  
16 as older people in particular might feel sadness and loneliness more; and gender, as  
17  
18 women were more concerned about precautions and transmission while men were  
19  
20 more resigned, rational and tended to cope better.[51]  
21  
22  
23  
24  
25

26 In some countries, such as the United States single-rooms have become the standard  
27  
28 for new hospitals and so one might expect fewer adverse effects if everyone is in a  
29  
30 single room, this being the norm. However it may be that a single room is necessary  
31  
32 but not sufficient for these findings, and that it is the combination of a single room  
33  
34 with an infection that leads to these results. Certainly it is far from clear that the long  
35  
36 list of advantages claimed for single rooms which include reduced stress, the ability to  
37  
38 deliver better care, and a lower probability of dietary or medication errors apply to  
39  
40 this group of patients.[52]  
41  
42  
43  
44  
45

46 Caring for patients in single-rooms does have many challenges, but there is evidence  
47  
48 that these can be mitigated in a general population;[9] however the expanding  
49  
50 literature on how this can be done in a general population does not necessarily apply  
51  
52 here due to the necessity of isolation procedures which are, by design, 'a barrier'.  
53  
54 Therefore patients' needs for greater social interaction will need a solution quite  
55  
56  
57  
58  
59  
60

1  
2  
3 different from that which might be used for a different patient population, and the  
4 benefit of choice about this which single rooms offer does not apply here.[53]

5  
6  
7 Although this review has quantified the extent of the problem, we have not been able  
8 to find solutions in the literature. Care might be improved through increased staff  
9 attention with more resources being allocated to these patients, although the extra cost  
10 of contact precautions is already considerable, one estimate being that it was an extra  
11 \$158.90 (95% CI \$124.90 to \$192.80) per patient day.[54] Alternatively new ways of  
12 working might be developed, perhaps using technology to mitigate some of these  
13 problems. What these might be is not clear however.  
14  
15  
16  
17  
18  
19  
20  
21  
22  
23  
24  
25

### 26 Study strengths and limitations

27  
28 This review suggests that infectious isolation has a number of negative effects on  
29 patients. Because this evidence is comprised of cohort and case-control studies, a  
30 claim for a causal relationship cannot be made on this evidence, although the strong  
31 and consistent effects across the studies may increase the confidence in this  
32 relationship. There are some qualitative data, although more in-depth mixed-methods  
33 data where those reporting negative effects are questioned about them would  
34 strengthen the evidence on this. In some cases large effect sizes were accompanied  
35 by very wide confidence intervals, suggesting that studies were underpowered, thus  
36 studies with larger sample sizes would be useful.  
37  
38  
39  
40  
41  
42  
43  
44  
45  
46  
47  
48  
49  
50

51 Although these data suggest that there is a problem, there is a clear gap both in what  
52 we know about improving the experience of isolation and what can be done in  
53 practical terms to make it more tolerable for patients and their families. In particular  
54 older people who may be most vulnerable to these negative effects were under-  
55  
56  
57  
58  
59  
60

1  
2  
3 represented in these studies; and this group are likely to represent an increasingly  
4  
5 large proportion of those isolated. Lastly the use of isolation may need to increase if  
6  
7 the current trends of antimicrobial resistance continue.  
8  
9  
10  
11  
12  
13

#### 14 Contributors

15  
16 EP, DG and JC conceived and conducted the review.  
17  
18  
19  
20

#### 21 Funding

22  
23 This research received no specific grant from any funding agency in the public,  
24  
25 commercial or not-for-profit sector.  
26  
27  
28  
29  
30

#### 31 A competing interests statement

32  
33 No authors have any competing interests to declare  
34  
35  
36  
37

#### 38 Data availability statement

39  
40 No additional data available  
41  
42  
43  
44  
45  
46  
47  
48  
49  
50  
51  
52  
53  
54  
55  
56  
57  
58  
59  
60

## References

- 1 Centres for Disease Control and Prevention. Transmission-Based Precautions | Basics | Infection Control | CDC. 2007. <https://www.cdc.gov/infectioncontrol/basics/transmission-based-precautions.html> (accessed 9 Feb 2019).
- 2 Barlow GD, Knight J, McKay I, *et al.* An audit of the use of side- and isolation room facilities in a UK teaching hospital. *J Hosp Infect* 2006;**62**:110–2. doi:10.1016/j.jhin.2005.05.006
- 3 Fusco FM, Puro V, Baka A, *et al.* Isolation rooms for highly infectious diseases: an inventory of capabilities in European countries. *J Hosp Infect* 2009;**73**:15–23. doi:10.1016/j.jhin.2009.06.009
- 4 Damji S, Barlow GD, Patterson L, *et al.* An audit of the use of isolation facilities in a UK National Health Service trust. *J Hosp Infect* 2005;**60**:213–7. doi:10.1016/j.jhin.2004.11.013
- 5 Wigglesworth N, Wilcox MH. Prospective evaluation of hospital isolation room capacity. *J Hosp Infect* 2006;**63**:156–61. doi:10.1016/j.jhin.2006.02.008
- 6 Gould DJ, Drey NS, Chudleigh J, *et al.* Isolating infectious patients: organizational, clinical, and ethical issues. *Am J Infect Control* 2018;**46**:e65–9. doi:10.1016/j.ajic.2018.05.024
- 7 Dettenkofer M, Wenzler S, Amthor S, *et al.* Does disinfection of environmental surfaces influence nosocomial infection rates? A systematic review. *Am J Infect Control* 2004;**32**:84–9. doi:10.1016/j.ajic.2003.07.006



- 1  
2  
3 8 Zingg W, Holmes A, Dettenkofer M, *et al.* Hospital organisation, management,  
4 and structure for prevention of health-care-associated infection: a systematic  
5 review and expert consensus. *Lancet Infect Dis* 2015;**15**:212–24.  
6  
7 doi:10.1016/S1473-3099(14)70854-0  
8  
9  
10  
11  
12  
13 9 Simon M, Maben J, Murrells T, *et al.* Is single room hospital accommodation  
14 associated with differences in healthcare-associated infection, falls, pressure  
15 ulcers or medication errors? A natural experiment with non-equivalent controls.  
16  
17 *Journal of Health Services Research & Policy* 2016;**21**:147–55.  
18  
19 doi:10.1177/1355819615625700  
20  
21  
22  
23  
24  
25  
26 10 Barratt RL, Shaban R, Moyle W. Patient experience of source isolation: lessons  
27 for clinical practice. *Contemp Nurse* 2011;**39**:180–93. doi:10.5172/conu.2011.180  
28  
29  
30  
31  
32 11 Abad C, Fearday A, Safdar N. Adverse effects of isolation in hospitalised  
33 patients: a systematic review. *Journal of Hospital Infection* 2010;**76**:97–102.  
34  
35 doi:10.1016/j.jhin.2010.04.027  
36  
37  
38  
39  
40 12 Moher D, Liberati A, Tetzlaff J, *et al.* Preferred reporting items for systematic  
41 reviews and meta-analyses: the PRISMA statement. *BMJ* 2009;**339**:b2535.  
42  
43 doi:10.1136/bmj.b2535  
44  
45  
46  
47 13 World Health Organization. *Global action plan on antimicrobial resistance.*  
48  
49 *World Health Organization.* Geneva, Switzerland: : World Health Organization  
50  
51 2015. <http://www.who.int/iris/handle/10665/193736>  
52  
53  
54  
55 14 R Core Team. *R: A language and environment for statistical computing.* Vienna,  
56  
57 Austria: 2018. <https://www.R-project.org/>  
58  
59  
60

- 1  
2  
3 15 Schwarzer G. meta: An R package for meta-analysis. *R News* 2007;**7**:40–5.  
4  
5  
6  
7 16 Day HR, Perencevich EN, Harris AD, *et al.* Association between Contact  
8  
9 Precautions and Delirium at a Tertiary Care Center. *Infection Control & Hospital*  
10  
11 *Epidemiology* 2012;**33**:34–9. doi:10.1086/663340  
12  
13  
14 17 Day HR, Perencevich EN, Harris AD, *et al.* Depression, Anxiety, and Moods of  
15  
16 Hospitalized Patients under Contact Precautions. *Infection Control & Hospital*  
17  
18 *Epidemiology* 2013;**34**:251–8. doi:10.1086/669526  
19  
20  
21  
22 18 Lupión-Mendoza C, Antúnez-Domínguez MJ, González-Fernández C, *et al.*  
23  
24 Effects of isolation on patients and staff. *American Journal of Infection Control*  
25  
26 2015;**43**:397–9. doi:10.1016/j.ajic.2015.01.009  
27  
28  
29  
30 19 Soon MML, Madigan E, Jones KR, *et al.* An exploration of the psychologic  
31  
32 impact of contact isolation on patients in Singapore. *American Journal of*  
33  
34 *Infection Control* 2013;**41**:e111–3. doi:10.1016/j.ajic.2013.01.037  
35  
36  
37  
38 20 Tarzi S, Kennedy P, Stone S, *et al.* Methicillin-resistant *Staphylococcus aureus*:  
39  
40 psychological impact of hospitalization and isolation in an older adult population.  
41  
42 *Journal of Hospital Infection* 2001;**49**:250–4. doi:10.1053/jhin.2001.1098  
43  
44  
45  
46 21 Tran K, Bell C, Stall N, *et al.* The Effect of Hospital Isolation Precautions on  
47  
48 Patient Outcomes and Cost of Care: A Multi-Site, Retrospective, Propensity  
49  
50 Score-Matched Cohort Study. *J Gen Intern Med* 2017;**32**:262–8.  
51  
52 doi:10.1007/s11606-016-3862-4  
53  
54  
55  
56 22 Guilley-Lerondeau B, Bourigault C, Guille des Buttes A-C, *et al.* Adverse effects  
57  
58 of isolation: a prospective matched cohort study including 90 direct interviews of  
59  
60

- 1  
2  
3 hospitalized patients in a French University Hospital. *European Journal of*  
4  
5 *Clinical Microbiology & Infectious Diseases* 2017;**36**:75–80.  
6  
7 doi:10.1007/s10096-016-2772-z  
8  
9  
10  
11 23 Mehrotra P, Croft L, Day HR, *et al.* Effects of Contact Precautions on Patient  
12  
13 Perception of Care and Satisfaction: A Prospective Cohort Study. *Infection*  
14  
15 *Control & Hospital Epidemiology* 2013;**34**:1087–93. doi:10.1086/673143  
16  
17  
18  
19 24 Livorsi DJ, Kundu MG, Batteiger B, *et al.* Effect of contact precautions for  
20  
21 MRSA on patient satisfaction scores. *Journal of Hospital Infection* 2015;**90**:263–  
22  
23 6. doi:10.1016/j.jhin.2015.02.007  
24  
25  
26  
27 25 Evans HL, Shaffer MM, Hughes MG, *et al.* Contact isolation in surgical patients:  
28  
29 A barrier to care? *Surgery* 2003;**134**:180–8. doi:10.1067/msy.2003.222  
30  
31  
32  
33 26 Croft LD, Liquori M, Ladd J, *et al.* The Effect of Contact Precautions on  
34  
35 Frequency of Hospital Adverse Events. *Infection Control & Hospital*  
36  
37 *Epidemiology* 2015;**36**:1268–74. doi:10.1017/ice.2015.192  
38  
39  
40  
41 27 Saint S, Higgins LA, Nallamotheu BK, *et al.* Do physicians examine patients in  
42  
43 contact isolation less frequently? A brief report. *Am J Infect Control*  
44  
45 2003;**31**:354–6.  
46  
47  
48  
49 28 Masse V, Valiquette L, Boukhoudmi S, *et al.* Impact of Methicillin Resistant  
50  
51 Staphylococcus aureus Contact Isolation Units on Medical Care. *PLoS ONE*  
52  
53 2013;**8**:e57057. doi:10.1371/journal.pone.0057057  
54  
55  
56  
57 29 Lau D, Majumdar SR, McAlister FA. Patient isolation precautions and 30-day  
58  
59 risk of readmission or death after hospital discharge: a prospective cohort study.  
60

1  
2  
3 *International Journal of Infectious Diseases* 2016;**43**:74–6.

4  
5 doi:10.1016/j.ijid.2015.12.018

- 6  
7  
8  
9 30 Spence MR, McQuaid M. The interrelationship of isolation precautions and  
10  
11 adverse events in an acute care facility. *American Journal of Infection Control*  
12  
13 2011;**39**:154–5. doi:10.1016/j.ajic.2010.04.213  
14  
15  
16  
17 31 Stelfox HT. Safety of Patients Isolated for Infection Control. *JAMA*  
18  
19 2003;**290**:1899. doi:10.1001/jama.290.14.1899  
20  
21  
22  
23 32 Gammon J. Analysis of the stressful effects of hospitalisation and source isolation  
24  
25 on coping and psychological constructs. *Int J Nurs Pract* 1998;**4**:84–96.  
26  
27  
28 33 Findik UY, Ozbaş A, Cavdar I, *et al.* Effects of the contact isolation application  
29  
30 on anxiety and depression levels of the patients: Effects of the contact isolation  
31  
32 application. *International Journal of Nursing Practice* 2012;**18**:340–6.  
33  
34 doi:10.1111/j.1440-172X.2012.02049.x  
35  
36  
37  
38 34 Kennedy P, Hamilton LR. Psychological impact of the management of  
39  
40 methicillin-resistant *Staphylococcus aureus* (MRSA) in patients with spinal cord  
41  
42 injury. *Spinal Cord* 1997;**35**:617–9.  
43  
44  
45  
46 35 Day HR, Morgan DJ, Himelhoch S, *et al.* Association between depression and  
47  
48 contact precautions in veterans at hospital admission. *American Journal of*  
49  
50 *Infection Control* 2011;**39**:163–5. doi:10.1016/j.ajic.2010.06.024  
51  
52  
53  
54 36 Colorado B, Del Toro D, Tarima S. Impact of Contact Isolation on FIM Score  
55  
56 Change, FIM Efficiency Score, and Length of Stay in Patients in Acute Inpatient  
57  
58 Rehabilitation Facility. *PM&R* 2014;**6**:988–91. doi:10.1016/j.pmrj.2014.05.017  
59  
60

- 1  
2  
3 37 Dashiell-Earp CN, Bell DS, Ang AO, *et al.* Do physicians spend less time with  
4 patients in contact isolation?: a time-motion study of internal medicine interns.  
5  
6 *JAMA Intern Med* 2014;**174**:814–5. doi:10.1001/jamainternmed.2014.537  
7  
8  
9  
10  
11 38 Gandra S, Barysaukas CM, Mack DA, *et al.* Impact of contact precautions on  
12 falls, pressure ulcers and transmission of MRSA and VRE in hospitalized  
13 patients. *Journal of Hospital Infection* 2014;**88**:170–6.  
14  
15  
16 doi:10.1016/j.jhin.2014.09.003  
17  
18  
19  
20  
21 39 Kirkland KB, Weinstein JM. Adverse effects of contact isolation. *Lancet*  
22  
23 1999;**354**:1177–8. doi:10.1016/S0140-6736(99)04196-3  
24  
25  
26  
27 40 Day HR, Perencevich EN, Harris AD, *et al.* Do contact precautions cause  
28 depression? A two-year study at a tertiary care medical centre. *Journal of*  
29  
30 *Hospital Infection* 2011;**79**:103–7. doi:10.1016/j.jhin.2011.03.026  
31  
32  
33  
34  
35 41 Wassenberg MWM, Severs D, Bonten MJM. Psychological impact of short-term  
36 isolation measures in hospitalised patients. *Journal of Hospital Infection*  
37  
38 2010;**75**:124–7. doi:10.1016/j.jhin.2010.01.023  
39  
40  
41  
42  
43 42 Chittick P, Koppisetty S, Lombardo L, *et al.* Assessing patient and caregiver  
44 understanding of and satisfaction with the use of contact isolation. *American*  
45  
46 *Journal of Infection Control* 2016;**44**:657–60. doi:10.1016/j.ajic.2015.12.033  
47  
48  
49  
50  
51 43 Davies H, Rees J. Psychological effects of isolation nursing (1): Mood  
52  
53 disturbance. *Nurs Stand* 2000;**14**:35–8. doi:10.7748/ns2000.03.14.28.35.c2799  
54  
55  
56  
57  
58  
59  
60

- 1  
2  
3 44 Rees J, Davies HR, Birchall C, *et al.* Psychological effects of source isolation  
4 nursing (2): Patient satisfaction. *Nurs Stand* 2000;**14**:32–6.  
5  
6 doi:10.7748/ns2000.04.14.29.32.c2805  
7  
8  
9  
10  
11 45 Wilkins EG, Ellis ME, Dunbar EM, *et al.* Does isolation of patients with  
12 infections induce mental illness? *J Infect* 1988;**17**:43–7.  
13  
14  
15  
16 46 Cohen CC, Cohen B, Shang J. Effectiveness of contact precautions against  
17 multidrug-resistant organism transmission in acute care: a systematic review of  
18 the literature. *Journal of Hospital Infection* 2015;**90**:275–84.  
19  
20  
21  
22  
23  
24  
25  
26  
27 47 Landelle C, Pagani L, Harbarth S. Is patient isolation the single most important  
28 measure to prevent the spread of multidrug-resistant pathogens? *Virulence*  
29  
30  
31  
32  
33  
34  
35  
36  
37 48 Santos RP, Mayo TW, Siegel JD. Healthcare Epidemiology: Active Surveillance  
38 Cultures and Contact Precautions for Control of Multidrug-Resistant Organisms:  
39 Ethical Considerations. *Clinical Infectious Diseases* 2008;**47**:110–6.  
40  
41  
42  
43  
44  
45 49 Alonso-Coello P, Oxman AD, Moberg J, *et al.* GRADE Evidence to Decision  
46 (EtD) frameworks: a systematic and transparent approach to making well  
47 informed healthcare choices. 2: Clinical practice guidelines. *BMJ* 2016;:i2089.  
48  
49  
50  
51  
52  
53  
54  
55 50 Jeong H, Yim HW, Song Y-J, *et al.* Mental health status of people isolated due to  
56 Middle East Respiratory Syndrome. *Epidemiology and Health* 2016;**38**:e2016048.  
57  
58  
59  
60

- 1  
2  
3 51 Madsen A. Experience of source isolation during hospitalization – a qualitative  
4 study. *Antimicrobial Resistance and Infection Control* 2015;**4**. doi:10.1186/2047-  
5 2994-4-S1-P95  
6  
7  
8  
9  
10  
11 52 Rechel B, European Health Property Network, European Observatory on Health  
12 Systems and Policies, editors. *Investing in hospitals of the future*. Copenhagen: :  
13 World Health Organization, European Observatory on Health Systems and  
14 Policies 2009.  
15  
16  
17  
18  
19  
20  
21 53 Persson E, Anderberg P, Kristensson Ekwall A. A room of one's own - Being  
22 cared for in a hospital with a single-bed room design. *Scandinavian Journal of*  
23 *Caring Sciences* 2015;**29**:340–6. doi:10.1111/scs.12168  
24  
25  
26  
27  
28  
29 54 Roth JA, Hornung-Winter C, Radicke I, *et al*. Direct Costs of a Contact Isolation  
30 Day: A Prospective Cost Analysis at a Swiss University Hospital. *Infection*  
31 *Control & Hospital Epidemiology* 2018;**39**:101–3. doi:10.1017/ice.2017.258  
32  
33  
34  
35  
36  
37  
38  
39  
40  
41  
42  
43  
44  
45  
46  
47  
48  
49  
50  
51  
52  
53  
54  
55  
56  
57  
58  
59  
60

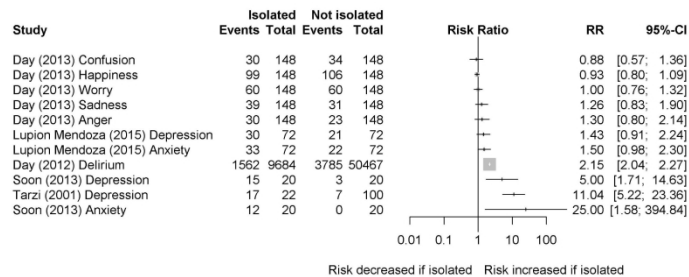

Figure 1. Relative risk of psychological events in those isolated versus not isolated

276x103mm (300 x 300 DPI)



1  
2  
3  
4  
5  
6  
7  
8  
9  
10  
11  
12  
13  
14  
15  
16  
17  
18  
19  
20  
21  
22  
23  
24  
25  
26  
27  
28  
29  
30  
31  
32  
33  
34  
35  
36  
37  
38  
39  
40  
41  
42  
43  
44  
45  
46  
47  
48  
49  
50  
51  
52  
53  
54  
55  
56  
57  
58  
59  
60

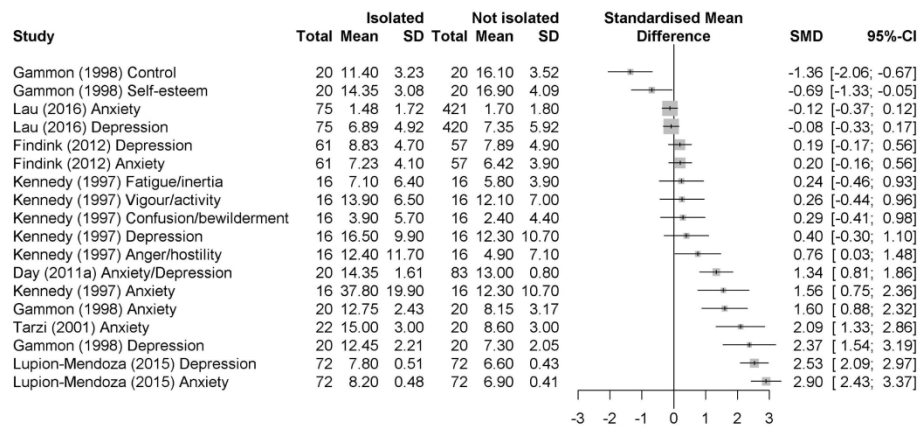

Figure 2. Standardised mean difference of psychological scores in those isolated versus those not isolated

251x114mm (300 x 300 DPI)

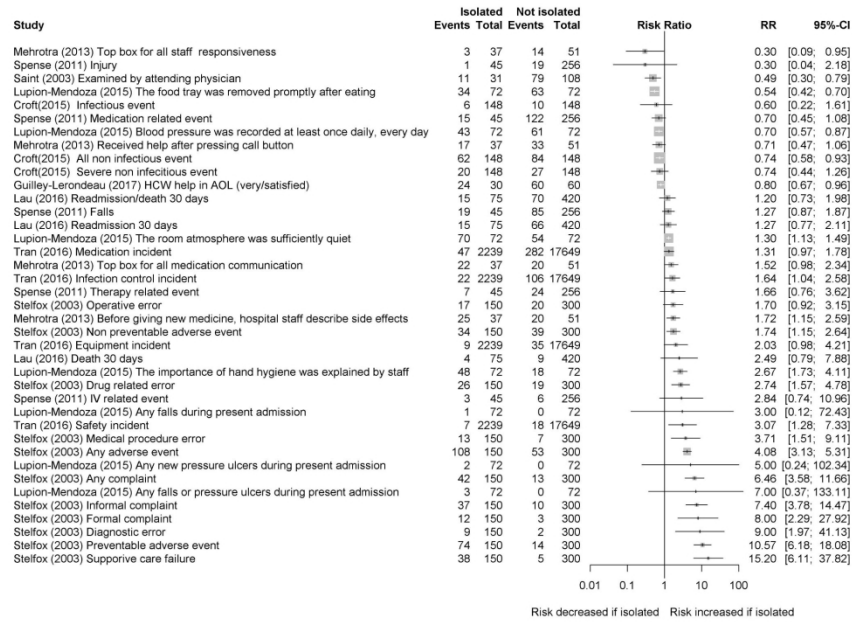

Figure 3. Relative risk of non-psychological events in those isolated versus not isolated

207x138mm (300 x 300 DPI)

1  
2  
3  
4  
5  
6  
7  
8  
9  
10  
11  
12  
13  
14  
15  
16  
17  
18  
19  
20  
21  
22  
23  
24  
25  
26  
27  
28  
29  
30  
31  
32  
33  
34  
35  
36  
37  
38  
39  
40  
41  
42  
43  
44  
45  
46  
47  
48  
49  
50  
51  
52  
53  
54  
55  
56  
57  
58  
59  
60

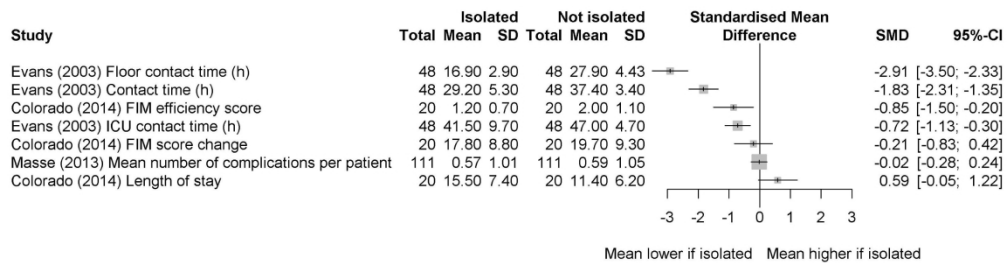

Figure 4. Standardised mean difference of non-psychological scores in those isolated versus those not isolated

251x114mm (300 x 300 DPI)

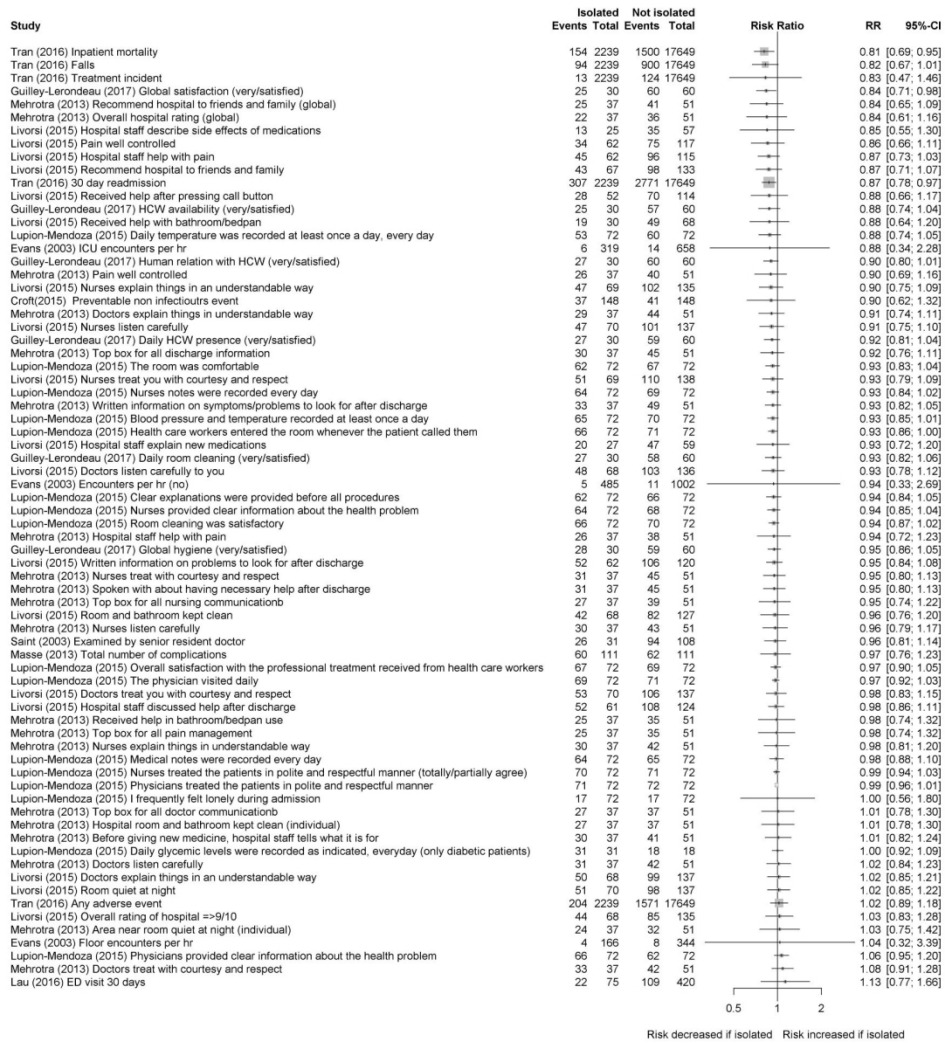

Figure 5. Relative risk of non-psychological events in those isolated versus not isolated (non clinically significant only)

153x187mm (300 x 300 DPI)

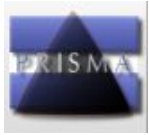

## PRISMA 2009 Flow Diagram

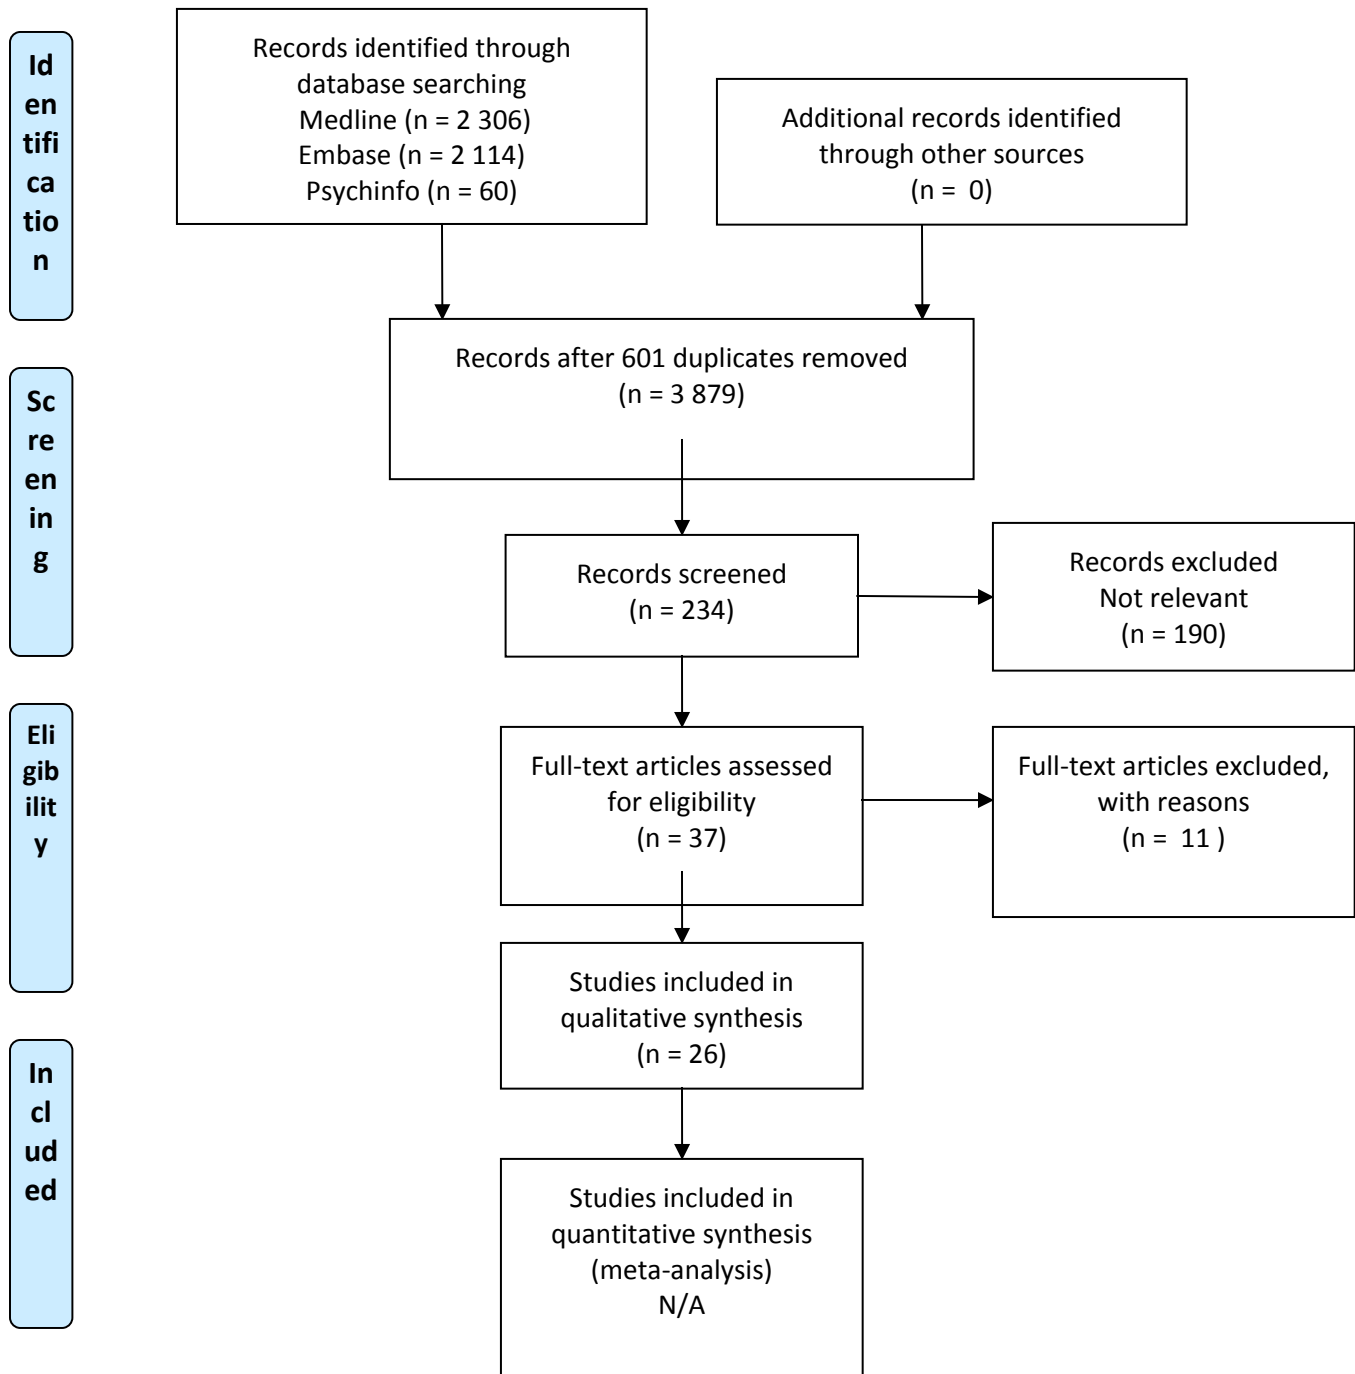

56 From: Moher D, Liberati A, Tetzlaff J, Altman DG, The PRISMA Group (2009). Preferred Reporting Items for Systematic Reviews and Meta-Analyses: The PRISMA Statement. PLoS Med 6(7): e1000097. doi:10.1371/journal.pmed1000097

57 For more information, visit [www.prisma-statement.org](http://www.prisma-statement.org).

58 For peer review only - <http://bmjopen.bmj.com/site/about/guidelines.xhtml>

59

60

**Characteristics of studies**

| Reference            | Study type                                                                                                                                                                | Isolated                                                                                                                                                          | Non isolated                                                                                                                                      |
|----------------------|---------------------------------------------------------------------------------------------------------------------------------------------------------------------------|-------------------------------------------------------------------------------------------------------------------------------------------------------------------|---------------------------------------------------------------------------------------------------------------------------------------------------|
| Chittick (2016)      | Cross sectional survey.<br>Response rate<br>48.7%.<br>Tertiary centre, United States<br>January 1, 2014 to December 31, 2014                                              | Patients in contact isolation for >48 hours<br>Demographics not given                                                                                             |                                                                                                                                                   |
| Colorado (2014)      | Retrospective matched case control study.<br>Rehabilitation facility- tertiary centre<br>United States<br>July 2009 to December 2010                                      | N20<br>Patients in contact isolation                                                                                                                              | N=20<br>Matched to patients not in contact isolation based on age, rehabilitation diagnosis, and type of insurance                                |
| Croft (2015)         | Prospective cohort<br>Medical or surgical inpatients admitted to non-intensive care unit hospital wards, United States.<br>January to November 2010.                      | N=148<br>Patients on contact precautions<br>Age: 52 (13.8)<br>% male: 53.4                                                                                        | N=148<br>Individually matched by after an initial 3-day length of stay to patients not on contact precautions.<br>Age 52.3 (14.6)<br>% male: 46.6 |
| Dashiell-Earp (2014) | Collected real-time data on the location of 15 internal medicine interns, United States.<br>October 1, 2012 to December 31, 2012                                          | 1156 encounters                                                                                                                                                   | 2467 encounters                                                                                                                                   |
| Day (2011)           | Patients admitted to the general acute care units, United States.<br>June 1, 2009 to October 30, 2009                                                                     | N=20<br>Age: 68.5 (14.7)<br>% male: 85.0                                                                                                                          | N=83<br>Age: 63.9 (12.6)<br>% male: 95.2                                                                                                          |
| Day (2011)           | A two-year retrospective cohort<br>Tertiary care, United States..<br>All general inpatients over 18 years hospitalized for >24 h<br>February 1, 2007 to January 31, 2009. | Contact precautions private room when possible, can be cohorted<br>General N = 3138<br>Age: 51.2 (17.5) % male 58.9<br>ITU N=1694<br>Age: 54.9 (17.5) % male 61.0 | General N = 25 426<br>Age: 49.6 (19.0) % male 46.3%<br>ICU N = 5 854<br>Age: 56.0 (17.7)<br>% male 59.7                                           |
| Day (2012)           | 2-year retrospective cohort study of all non-psychiatric hospital admissions >18 years, United States.<br>February 1, 2007 to January 31, 2009                            | N = 9 684<br>Contact precautions as above<br>Mean age: 50.1 (18.8) % male 51.4                                                                                    | N = 50 458<br>Mean age: 52.3 (16.9)<br>% males 59.1                                                                                               |
| Day (2013)           | Longitudinal frequency-matched                                                                                                                                            | N = 148                                                                                                                                                           | N = 148                                                                                                                                           |

|                          |                                                                                                                                                                  |                                                                                                                   |                                                                                                                      |
|--------------------------|------------------------------------------------------------------------------------------------------------------------------------------------------------------|-------------------------------------------------------------------------------------------------------------------|----------------------------------------------------------------------------------------------------------------------|
|                          | cohort study of patients admitted to general medical and surgical units, United States. Day 0, day 3 then weekly.<br>January to November 2010                    | Mean age: 52.0 (13.9)<br>% male 58.1                                                                              | Mean age: 52.3 (14.6)<br>% male 50.7                                                                                 |
| Evans (2003)             | Prospective observation; survey; retrospective review, United States. Tertiary care.<br>June and July 2001                                                       | N 48<br>Mean age: 47.8 (2)<br>% male 85%                                                                          | N = 48<br>Mean age: 58.3 (2.4)<br>% male 75%                                                                         |
| Findink (2012)           | Non-random quasi-experiment, Turkey<br>Age 18 to 65 Administered day 5<br>January 1, 2009 to December 31, 2009                                                   | N = 60<br>Mean age: 53.95 (18.4)<br>% male 75%                                                                    | N = 57<br>Mean age: 56.14 (17.1)<br>% male 76.3%                                                                     |
| Gammon (1998)            | Quasi experiment<br>Selected if last two numbers on their case notes even.<br>Two large District General Hospitals and one elderly care hospital, United Kingdom | N = 20<br>Placed in isolation for a minimum of 7days<br>Mean age: 61 years<br>% male: 65                          | N = 20<br>Mean age: 52 years<br>% male: 55                                                                           |
| Gandra (2014)            | Retrospective hospital-wide cohort study, United States. All patients admitted to medical-surgical inpatient units<br>November 1, 2009 to October 31, 2011       | Falls N=77<br>Mean age: 66.1 (14.3)<br>% male: 61%<br>Pressure ulcers N=82<br>Mean age: 64.5 (15.5)<br>% male: 63 | Falls N=82<br>Mean age: 63.7 (15.8)<br>% male: 51 (62%)<br>Pressure ulcers N=71<br>Mean age: 65.7 (15)<br>% male: 57 |
| Guilley-Lerondeau (2017) | Matched cohort study with prospective inclusions<br>Interview 3 days after commencing<br>General sample. France<br>March to July 2012                            | N=30<br>First prescription of isolation precaution<br>Median age (range) 69 (32 to 91)<br>% male 47               | N=60<br>Median age (range) 64 (24 to 91)<br>% male 53                                                                |
| Kennedy (1997)           | Cross-sectional matched-control study, United Kingdom.<br>May 1994 to November 1996                                                                              | N = 16<br>Isolated as a result of being MRSA<br>Mean age: 31.1<br>All male                                        | N = 16<br>Matched for age, sex, level of injury, and time since admission or injury                                  |
| Kirkland (1999)          | Observational study - 7 months<br>Medical intensive-care, United States                                                                                          | N=14                                                                                                              | N=21                                                                                                                 |
| Lau (2016)               | Prospective cohort study.<br>Adult patients discharged from                                                                                                      | N=75<br>Mean age 60.35 (17.83)                                                                                    | N=420<br>Mean age 63.31 (18.69)                                                                                      |

|                              |                                                                                                                                                               |                                                                                                                                                                                                             |                                                                                     |
|------------------------------|---------------------------------------------------------------------------------------------------------------------------------------------------------------|-------------------------------------------------------------------------------------------------------------------------------------------------------------------------------------------------------------|-------------------------------------------------------------------------------------|
|                              | internal medicine wards, Canada<br>October 2013 to November 2014,                                                                                             | % male 59                                                                                                                                                                                                   | % male 48%                                                                          |
| Livorsi<br>(2015)            | Case-control study<br>Retrospective January 1, 2012 to<br>May 31, 2012/prospective June 1,<br>2012 to March 31, 2013<br>'safety-net facility', United States  | N = 70<br>On contact precautions for MRSA throughout<br>their hospital stay. Found to be MRSA<br>positive during a previous hospitalization or<br>as an outpatient, not current case                        | N = 139<br>No significant differences between isolated and<br>non-isolated patients |
| Lupi3n-<br>Mendoza<br>(2015) | Matched case-control study<br>Tertiary hospital, Spain<br>2011 and 2012                                                                                       | N = 72<br>Adult patients admitted in isolation<br>for =>5 days.<br>Median age (range) 62 (21-93)<br>% male 73%                                                                                              | N = 72<br>Median age (range) 69 (23-89),<br>% male 68.1%                            |
| Massee<br>(2013)             | Retrospective case-control<br>Tertiary care, Canada                                                                                                           | N = 111<br>Matched MRSA patients with an admission<br>diagnosis of heart failure or COPD to similar<br>non-isolated controls<br>Median age (IQR) 80.0 (69.0-86.0)<br>% male 60.4%                           | N = 111<br>Median age (IQR) 80.0 (68.0-86.0)<br>% male 60.4%                        |
| Mehrotra<br>(2013)           | Prospective cohort<br>Admission and on days 3, 7, 14<br>Tertiary centre, United States                                                                        | N = 238<br>Segregation into a private or cohorted room<br>Mean age (SD) 52.4 (13.4)<br>% male 55.7                                                                                                          | N = 290<br>Mean age (SD) 52.9 (14.8)<br>% male 48                                   |
| Saint (2003)                 | Prospective cohort study<br>2 university-affiliated medical<br>centers, United States.<br>October 1999 to March 2000                                          | N=31                                                                                                                                                                                                        | N=108                                                                               |
| Soon (2013)                  | Cross-sectional survey of cases and<br>matched controls<br>Teaching hospital Singapore<br>June and August 2011                                                | N=20<br>Contact isolation in a cohort cubicle for the<br>first time because of colonization or infection<br>with a MDRO for at least 3 days<br>No statistically significant differences in age<br>or gender | N=20                                                                                |
| Spense<br>(2011)             | Retrospective evaluation of incident<br>reports<br>All patients admitted to acute care<br>facility, United States<br>January 1, 2008 to December 31,<br>2008. | N=45                                                                                                                                                                                                        | N=256                                                                               |
| Stelfox                      | Case control study                                                                                                                                            | General N = 78                                                                                                                                                                                              | General N = 156                                                                     |



|                   |                                                                                                                                                                            |                                                                                                                     |                                                                                  |
|-------------------|----------------------------------------------------------------------------------------------------------------------------------------------------------------------------|---------------------------------------------------------------------------------------------------------------------|----------------------------------------------------------------------------------|
| (2003)            | Consecutive adults isolated for at least 2 days with MRSA. Canada and United States<br>Controls patients admitted before and after.<br>January 1, 1999, to January 1, 2000 | Age: 69.6 (17.1)<br>% male: 45%<br>CHF N = 72<br>Age: 66.9 (14.7)<br>% male: 58                                     | Age: 65.4 (18.2)<br>% male: 51%<br>CHF N = 144<br>Age: 66.0 (14.5)<br>% male: 54 |
| Tarzi (2001)      | Cross-sectional matched case-control study<br>Care of the elderly rehabilitation wards, UK                                                                                 | N = 22<br>Had been in isolation for at least two weeks with MRSA<br>Mean age (SD) 80 (8.4)<br>% male 27.3           | N = 20<br>Mean age (SD) 81 (9.1)<br>% male 33.3                                  |
| Tran (2017)       | Propensity matched cohort study.<br>General internal medicine services, 3 hospitals, Canada<br>January 2010 to December 2012                                               | MRSA<br>Age: 69<br>% male 57%<br>Respiratory<br>Age: 71.7<br>% male: 53<br>Isolated for MRSA or respiratory illness | MRSA<br>Age: 69<br>% male 58%<br>Respiratory<br>Age: 70.6<br>% male: 55          |
| Wassenburg (2010) | Cross-sectional matched cohort study<br>Single university hospital,<br>Netherlands<br>November 2006 to February 2007                                                       | N = 42<br>Age: 52 (19)<br>% male: 52                                                                                | N = 84<br>Age: 55 (16)<br>% male: 55                                             |

### Excluded papers

| Reference             | Reason for exclusion         |
|-----------------------|------------------------------|
| Chittick et al (2016) | No comparative data          |
| Godsell (2013)        | Focussed on HCP              |
| Jeong (2016)          | MERS                         |
| MacKellaig (1986)     | Qualitative                  |
| Madsden (2015)        | Qualitative                  |
| Maunder (2003)        | SARS                         |
| Moran (2009)          | Focus on family centred care |
| Morgan (2011)         | Focus on process measures    |

|                |                     |
|----------------|---------------------|
| Rees (2000a)   | No comparative data |
| Rees (2000a)   | No comparative data |
| Simon (2016)   | Before and after    |
| Wilkins (1988) | No comparative data |

For peer review only

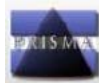

# PRISMA 2009 Checklist

| Section/topic                      | #  | Checklist item                                                                                                                                                                                                                                                                                              | Reported on page # |
|------------------------------------|----|-------------------------------------------------------------------------------------------------------------------------------------------------------------------------------------------------------------------------------------------------------------------------------------------------------------|--------------------|
| <b>TITLE</b>                       |    |                                                                                                                                                                                                                                                                                                             |                    |
| Title                              | 1  | Identify the report as a systematic review, meta-analysis, or both.                                                                                                                                                                                                                                         | 1                  |
| <b>ABSTRACT</b>                    |    |                                                                                                                                                                                                                                                                                                             |                    |
| Structured summary                 | 2  | Provide a structured summary including, as applicable: background; objectives; data sources; study eligibility criteria, participants, and interventions; study appraisal and synthesis methods; results; limitations; conclusions and implications of key findings; systematic review registration number. | 1-2                |
| <b>INTRODUCTION</b>                |    |                                                                                                                                                                                                                                                                                                             |                    |
| Rationale                          | 3  | Describe the rationale for the review in the context of what is already known.                                                                                                                                                                                                                              | 3                  |
| Objectives                         | 4  | Provide an explicit statement of questions being addressed with reference to participants, interventions, comparisons, outcomes, and study design (PICOS).                                                                                                                                                  | 4                  |
| <b>METHODS</b>                     |    |                                                                                                                                                                                                                                                                                                             |                    |
| Protocol and registration          | 5  | Indicate if a review protocol exists, if and where it can be accessed (e.g., Web address), and, if available, provide registration information including registration number.                                                                                                                               | 4                  |
| Eligibility criteria               | 6  | Specify study characteristics (e.g., PICOS, length of follow-up) and report characteristics (e.g., years considered, language, publication status) used as criteria for eligibility, giving rationale.                                                                                                      | 4                  |
| Information sources                | 7  | Describe all information sources (e.g., databases with dates of coverage, contact with study authors to identify additional studies) in the search and date last searched.                                                                                                                                  | 4                  |
| Search                             | 8  | Present full electronic search strategy for at least one database, including any limits used, such that it could be repeated.                                                                                                                                                                               | Suppl information  |
| Study selection                    | 9  | State the process for selecting studies (i.e., screening, eligibility, included in systematic review, and, if applicable, included in the meta-analysis).                                                                                                                                                   | 4                  |
| Data collection process            | 10 | Describe method of data extraction from reports (e.g., piloted forms, independently, in duplicate) and any processes for obtaining and confirming data from investigators.                                                                                                                                  | 5                  |
| Data items                         | 11 | List and define all variables for which data were sought (e.g., PICOS, funding sources) and any assumptions and simplifications made.                                                                                                                                                                       | 5                  |
| Risk of bias in individual studies | 12 | Describe methods used for assessing risk of bias of individual studies (including specification of whether this was done at the study or outcome level), and how this information is to be used in any data synthesis.                                                                                      | 6                  |
| Summary measures                   | 13 | State the principal summary measures (e.g., risk ratio, difference in means).                                                                                                                                                                                                                               | 5                  |
| Synthesis of results               | 14 | Describe the methods of handling data and combining results of studies, if done, including measures of consistency (e.g., $I^2$ ) for each meta-analysis.                                                                                                                                                   | 5                  |

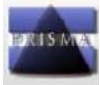

# PRISMA 2009 Checklist

| Section/topic                 | #  | Checklist item                                                                                                                                                                                           | Reported on page # |
|-------------------------------|----|----------------------------------------------------------------------------------------------------------------------------------------------------------------------------------------------------------|--------------------|
| Risk of bias across studies   | 15 | Specify any assessment of risk of bias that may affect the cumulative evidence (e.g., publication bias, selective reporting within studies).                                                             | 6                  |
| Additional analyses           | 16 | Describe methods of additional analyses (e.g., sensitivity or subgroup analyses, meta-regression), if done, indicating which were pre-specified.                                                         | None               |
| <b>RESULTS</b>                |    |                                                                                                                                                                                                          |                    |
| Study selection               | 17 | Give numbers of studies screened, assessed for eligibility, and included in the review, with reasons for exclusions at each stage, ideally with a flow diagram.                                          | 5                  |
| Study characteristics         | 18 | For each study, present characteristics for which data were extracted (e.g., study size, PICOS, follow-up period) and provide the citations.                                                             | Suppl information  |
| Risk of bias within studies   | 19 | Present data on risk of bias of each study and, if available, any outcome level assessment (see item 12).                                                                                                | Suppl information  |
| Results of individual studies | 20 | For all outcomes considered (benefits or harms), present, for each study: (a) simple summary data for each intervention group (b) effect estimates and confidence intervals, ideally with a forest plot. | Figures            |
| Synthesis of results          | 21 | Present results of each meta-analysis done, including confidence intervals and measures of consistency.                                                                                                  | None               |
| Risk of bias across studies   | 22 | Present results of any assessment of risk of bias across studies (see Item 15).                                                                                                                          | 6                  |
| Additional analysis           | 23 | Give results of additional analyses, if done (e.g., sensitivity or subgroup analyses, meta-regression [see Item 16]).                                                                                    | None               |
| <b>DISCUSSION</b>             |    |                                                                                                                                                                                                          |                    |
| Summary of evidence           | 24 | Summarize the main findings including the strength of evidence for each main outcome; consider their relevance to key groups (e.g., healthcare providers, users, and policy makers).                     | 9-10               |
| Limitations                   | 25 | Discuss limitations at study and outcome level (e.g., risk of bias), and at review-level (e.g., incomplete retrieval of identified research, reporting bias).                                            | 11                 |
| Conclusions                   | 26 | Provide a general interpretation of the results in the context of other evidence, and implications for future research.                                                                                  | 11                 |
| <b>FUNDING</b>                |    |                                                                                                                                                                                                          |                    |
| Funding                       | 27 | Describe sources of funding for the systematic review and other support (e.g., supply of data); role of funders for the systematic review.                                                               | None               |

From: Moher D, Liberati A, Tetzlaff J, Altman DG, The PRISMA Group (2009). Preferred Reporting Items for Systematic Reviews and Meta-Analyses: The PRISMA Statement. PLoS Med 6(7): e1000097. doi:10.1371/journal.pmed1000097

For more information, visit: [www.prisma-statement.org](http://www.prisma-statement.org).

# BMJ Open

## Impact of isolation on hospitalised patients who are infectious: systematic review with quantitative and meta-analysis

|                                 |                                                                                                                                                                                                                                                              |
|---------------------------------|--------------------------------------------------------------------------------------------------------------------------------------------------------------------------------------------------------------------------------------------------------------|
| Journal:                        | <i>BMJ Open</i>                                                                                                                                                                                                                                              |
| Manuscript ID                   | bmjopen-2019-030371.R1                                                                                                                                                                                                                                       |
| Article Type:                   | Original research                                                                                                                                                                                                                                            |
| Date Submitted by the Author:   | 23-Aug-2019                                                                                                                                                                                                                                                  |
| Complete List of Authors:       | Pursell, Edward; City, University of London, School of Health Sciences<br>Gould, Dinah; Cardiff University School of Healthcare Studies, ; Cardiff University, Healthcare Sciences<br>Chudleigh, Jane; City, University of London, School of Health Sciences |
| <b>Primary Subject Heading</b>: | Infectious diseases                                                                                                                                                                                                                                          |
| Secondary Subject Heading:      | Mental health, Nursing, Patient-centred medicine                                                                                                                                                                                                             |
| Keywords:                       | Infection control < INFECTIOUS DISEASES, Anxiety disorders < PSYCHIATRY, Quality in health care < HEALTH SERVICES ADMINISTRATION & MANAGEMENT                                                                                                                |
|                                 |                                                                                                                                                                                                                                                              |

SCHOLARONE™  
Manuscripts

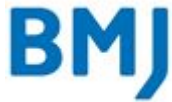

I, the Submitting Author has the right to grant and does grant on behalf of all authors of the Work (as defined in the below author licence), an exclusive licence and/or a non-exclusive licence for contributions from authors who are: i) UK Crown employees; ii) where BMJ has agreed a CC-BY licence shall apply, and/or iii) in accordance with the terms applicable for US Federal Government officers or employees acting as part of their official duties; on a worldwide, perpetual, irrevocable, royalty-free basis to BMJ Publishing Group Ltd ("BMJ") its licensees and where the relevant Journal is co-owned by BMJ to the co-owners of the Journal, to publish the Work in this journal and any other BMJ products and to exploit all rights, as set out in our [licence](#).

The Submitting Author accepts and understands that any supply made under these terms is made by BMJ to the Submitting Author unless you are acting as an employee on behalf of your employer or a postgraduate student of an affiliated institution which is paying any applicable article publishing charge ("APC") for Open Access articles. Where the Submitting Author wishes to make the Work available on an Open Access basis (and intends to pay the relevant APC), the terms of reuse of such Open Access shall be governed by a Creative Commons licence – details of these licences and which [Creative Commons](#) licence will apply to this Work are set out in our licence referred to above.

Other than as permitted in any relevant BMJ Author's Self Archiving Policies, I confirm this Work has not been accepted for publication elsewhere, is not being considered for publication elsewhere and does not duplicate material already published. I confirm all authors consent to publication of this Work and authorise the granting of this licence.

1  
2  
3 **Impact of isolation on hospitalised patients who are infectious:**  
4 **systematic review with quantitative and meta-analysis**  
5  
6

7 Edward Purssell, City, University of London, London, UK  
8 Dinah Gould, Cardiff University, Cardiff, UK  
9 Jane Chudleigh, City, University of London, London, UK  
10  
11  
12

13 Corresponding author:  
14 Edward Purssell,  
15 School of Health Sciences,  
16 City, University of London,  
17 1 Myddleton Street,  
18 London EC1R 1UW  
19

20  
21 Telephone: 07782 374217  
22 Fax: None  
23 Email: edward.purssell@city.ac.uk  
24  
25

26  
27 Keywords: Contact isolation; Infection control (MeSH); Patient isolation (MeSH);  
28 Quarantine (MeSH)  
29  
30

31 Word count - excluding title page, references, figures and tables – 3 220  
32  
33  
34  
35  
36  
37  
38  
39  
40  
41  
42  
43  
44  
45  
46  
47  
48  
49  
50  
51  
52  
53  
54  
55  
56  
57  
58  
59  
60

1  
2  
3 **Impact of isolation on hospitalised patients who are infectious: systematic review**  
4  
5 **with quantitative and meta-analysis**  
6  
7  
8  
9

10 **Abstract**  
11  
12  
13

14 Objective

15  
16 To systematically review the literature exploring impact of isolation on hospitalised  
17 patients who are infectious: psychological and non-psychological outcomes  
18  
19  
20  
21  
22

23 Design

24 Systematic review with meta-analysis  
25  
26  
27  
28  
29  
30

31 Data Sources

32  
33 Embase, Medline and Psycinfo were searched from inception until December 2018.  
34  
35 Reference lists and Google Scholar were also handsearched.  
36  
37  
38  
39

40 Results

41  
42 Twenty seven papers published from database inception until December 2018 were  
43 reviewed. A wide range of psychological and non-psychological outcomes were  
44 reported. There was a marked trend for isolated patients to exhibit higher levels of  
45 depression, the pooled standardised mean difference being 1.28 (95% CI: 0.47 to  
46 2.09) and anxiety 1.45 (95% CI: 0.56 to 2.34), although both had high levels of  
47 heterogeneity; and worse outcomes for a range of care-related factors but with  
48 significant variation.  
49  
50  
51  
52  
53  
54  
55  
56  
57  
58  
59  
60



## Conclusion

The review indicates that isolation to contain risk of infection has negative consequences for segregated patients. Although strength of the evidence is weak, comprising primarily single centre convenience samples, consistency of the effects may strengthen this conclusion. More research needs to be undertaken to examine this relationship and develop and test interventions to reduce the negative effects of isolation.

## Strengths and limitations of this study

- This review covers a wide variety of literature from a range of different clinical areas.
- Data collected and the methods of collecting data on the impact of isolation is varied across studies.
- These data do not show if these effects are temporary, or in most cases if they are clinically significant.

## Funding statement

This research received no specific grant from any funding agency in the public, commercial or not-for-profit sectors

## Competing interests statement

No authors have any competing interests to declare

## Introduction

Isolation is an established part of any infection prevention programme. Its purpose is to prevent the transmission of antibiotic-resistant pathogens, those that are highly contagious or cause serious infection.[1] The effectiveness of isolation has been questioned however [2–5] and it can be challenging to undertake, especially if patients' lack of understanding of the need for segregation, boredom or distress result in uncooperative behaviour. [6] A recent survey exploring the care of patients isolated for infectious conditions suggests that in clinical practice the main issues are identifying which patients need to be isolated as quickly as possible and prioritising which patients should be segregated when isolation accommodation is in short supply. Infection preventionists were aware that isolation could have negative effects on patients such as increased risk of anxiety, depression and falls and felt that more should be done to prevent these risks.[6]

Although single rooms are assumed to reduce infection risk, evidence of ability to contain spread is equivocal [7,8] and a recent study conducted in an all-single-room hospital was unable to demonstrate lower infection rates than in hospitals where most care takes place in open wards. [9] This study identified advantages and disadvantages of single room accommodation, whereas isolating infectious patients is generally assumed to result in adverse outcomes.[10]

A systematic review reported eight years ago indicated higher levels of anxiety, depression, perceptions of stigmatisation and a higher incidence of falls, medication errors and other incidents that detract from patient safety among patients who were isolated compared to those who were not.[11] This review reported studies undertaken

1  
2  
3 before 2010 and included patients whose experiences are unlikely to be comparable:  
4  
5 children and adults and those isolated to reduce their own risk of infection as well as  
6  
7 infectious patients. The review was not reported according to standards currently  
8  
9 expected for systematic reviews [12] and presents a qualitative description of patient  
10  
11 outcomes only. A more rigorously reported and up-to-date systematic review is  
12  
13 indicated in view of increasing concern about satisfaction with health care and patient  
14  
15 safety and increasing emphasis on infection prevention as part of the global strategy  
16  
17 to reduce risks of antimicrobial resistance.[13]  
18  
19  
20  
21  
22  
23

24 We undertook a systematic review of the literature to establish the effects of infection  
25  
26 related isolation on psychological and non-psychological care-related outcomes in  
27  
28 adults. This review is therefore more focussed than that previously undertaken which  
29  
30 also included those in protective isolation, and contains a significant body of literature  
31  
32 published since 2010.  
33  
34  
35  
36

### 37 **Method**

38  
39 The eligibility criteria for inclusion was that studies should compare quantitative data  
40  
41 on psychological or non-psychological outcomes in adult patients who are in infective  
42  
43 isolation with those not isolated. Purely symptomatic/disease progression outcomes  
44  
45 were not included, neither were those looking at patients isolated due to  
46  
47 immunosuppression. Studies not containing comparative data between those isolated  
48  
49 and not isolated were also excluded. Search terms were: Patient isolation; cross  
50  
51 infection; contact isolation; respiratory, source or contact isolation; droplet, airborne  
52  
53 or contact precautions; cubicle; MRSA or methicillin resistant *Staphylococcus aureus*;  
54  
55 patient safety or harm; depression; anxiety; adaptation; stress; patient satisfaction;  
56  
57  
58  
59  
60

1  
2  
3 quality of life. These were searched as free-text and index terms where these existed.  
4  
5 The information sources used were Embase, Medline and Psycinfo, which were  
6  
7 searched from inception until December 2018. Reference lists and Google Scholar  
8  
9 were also handsearched. Characteristics of included and excluded papers are shown  
10  
11 in Supplementary File 1. The PRISMA flow-chart together is given in Supplementary  
12  
13 File 2. given in with details of excluded papers are given in No protocol was  
14  
15 published in advance.  
16  
17  
18  
19  
20

21  
22 Studies were initially screened for relevance by one author (EP), with the final stage  
23  
24 being undertaken by two (EP, DG). Data were extracted and checked by two authors  
25  
26 (DG, EP); where there were disagreements data were rechecked for relevance and  
27  
28 accuracy. Where available, raw data were extracted and entered into a spreadsheet,  
29  
30 and depending upon the nature of the data either the risk ratio or standardised mean  
31  
32 difference calculated. Results were then presented as forest plots. Due to the variety  
33  
34 of different settings and methods it was deemed that the methodological and clinical  
35  
36 heterogeneity was too broad to pool results; apart from those related to anxiety and  
37  
38 depression, for which results were pooled using the random-effects model. All  
39  
40 calculations and plots were produced using the meta and metafor packages in R.[14–  
41  
42 16] Where raw data were not provided the summary results are given in the text but  
43  
44 not the forest plots. All data relevant to the study are included in the article or  
45  
46 uploaded as Supplementary File 3.  
47  
48  
49  
50  
51  
52  
53

#### 54 **Patient and Public Involvement**

55  
56 No patient involved.  
57  
58  
59  
60

## Results

A total of 3 879 papers were retrieved from the three databases; of which 34 were assessed for eligibility by reading the full text. Of these 13 studies provided data suitable for the calculation of risk ratio, 5 giving psychological outcomes,[17–21] and 12 non-psychological;[19,22–32] and 8 provided data for the calculation of standardised mean differences, 6 giving psychological outcomes,[21,30,33–36] and 2 non-psychological.[29,37] A further 6 studies did not provide raw data but are included in the results; 3 each giving psychological outcomes[38–40] and non-psychological outcomes.[17,41,42] Meta-analyses were possible on two outcomes: anxiety and depression from 8 studies using standardised mean difference. [19–21,30,33–36] Where only risk ratio data were given[20,21] conversion to standardised mean difference was undertaken using the Campbell Collaboration calculator (<https://campbellcollaboration.org/research-resources/effect-size-calculator.html>).[43]

Where it was not possible to pool outcome data because of methodological and clinical heterogeneity, the data from studies are shown as forest plots but without meta-analysis. The forest plots contain results from the studies where sufficient data were given to calculate either the risk ratio or standardised mean difference. A number of studies provided data on those under contact precautions, but no comparative data and so were not included.[44–47]

Because of the large number of non-psychological outcomes for which RR could be calculated, it was decided that a change of 20% (i.e. a RR of 0.8 or less, or 1.2 or more) would be clinically significant, regardless of the statistical significance. This

1  
2  
3 was a pragmatic decision, and all results are shown in Supplementary File 3. Results  
4 are shown in Figures 1 to 6. Supplementary Figure 1 contains results that did not  
5  
6 are shown in Figures 1 to 6. Supplementary Figure 1 contains results that did not  
7  
8 meet our criteria for being clinically significant. Outcomes were classified into one of  
9  
10 three categories: those to do with quality of care; satisfaction of care; and adverse  
11  
12 events from which median values and interquartile ranges were calculated.  
13  
14

15  
16  
17 The studies included were primarily single-centre and consisted of case-control,  
18  
19 cross-sectional and cohort studies. Risk of bias was assessed using the Newcastle-  
20  
21 Ottawa scale, full details of each study and its risk of bias are in the Supplementary  
22  
23 File 4.[48] Overall, although these studies have limited generalisability, there did not  
24  
25 appear to be significant cause for concern regarding bias within the limitations  
26  
27 inherent in these study designs. Most studies used established or validated tools[17–  
28  
29 21,23–25,27,29,30,33–37] or clinical outcomes.[22,26,28,31,32]  
30  
31  
32

33  
34  
35 The data from the comparative studies suggest that although in many cases infective  
36  
37 isolation precautions make little difference to psychological outcomes, where it does  
38  
39 make a difference this is primarily negative. There were significant declines in mean  
40  
41 scores related to control and self-esteem, and in many studies increases in the mean  
42  
43 scores for risk of anxiety and depression. However, these findings were not  
44  
45 consistent, and some larger studies showed little or no difference between the groups  
46  
47 for these outcomes. These are shown in Figures 1 and 2 respectively.  
48  
49  
50

51  
52  
53 [INSERT FIGURES 1 and 2 HERE]  
54  
55  
56  
57

58 Figure 1. Risk ratio of psychological events in those isolated versus not isolated  
59  
60

1  
2  
3  
4  
5  
6 Figure 2. Standardised mean difference of psychological scores in those isolated  
7  
8 versus those not isolated  
9

10  
11  
12 For the 8 studies reporting data on anxiety the pooled SMD was 1.45 (95% CI: 0.56 to  
13 2.34); although within this there was significant heterogeneity ( $Q = 168.11$ ,  $df = 7$ ,  $p$   
14  $< 0.0001$ ;  $I^2 = 95.84\%$ ). This was primarily caused by two studies [30,34] which  
15 showed lower levels of anxiety than the remaining studies. For depression the SMD  
16 was 1.28 (95% CI: 0.47 to 2.09); again with significant heterogeneity ( $Q = 154.5$ ,  $df =$   
17 7,  $p < 0.0001$ ;  $I^2 = 95.47\%$ ), in this case the studies falling into two categories, those  
18 with lower [30,34,35] and higher depression scores among those  
19 isolated.[19,20,33,36] The forest plots for these outcomes are shown in Figures 3 and  
20 4 respectively.  
21  
22  
23  
24  
25  
26  
27  
28  
29  
30  
31  
32  
33  
34  
35  
36  
37  
38  
39

40 [INSERT FIGURES 3 and 4 HERE]  
41  
42  
43  
44  
45  
46  
47  
48  
49  
50  
51  
52  
53  
54  
55  
56  
57  
58  
59  
60

40 Figure 3. Meta-analysis of the standardised mean difference of anxiety in those  
41  
42 isolated versus those not isolated  
43  
44  
45  
46  
47  
48  
49  
50  
51  
52  
53  
54  
55  
56  
57  
58  
59  
60

47 Figure 4. Meta-analysis of the standardised mean difference of depression in those  
48  
49 isolated versus those not isolated  
50  
51  
52  
53  
54  
55  
56  
57  
58  
59  
60

54 Studies not reporting the raw data showed that contact precautions were associated  
55 with depression OR 1.4 (95% CI 1.2 to 1.5) but not anxiety OR 0.8 (95% CI 0.7 to  
56 1.1) in a non-ICU population.[41] There was also an association with delirium OR  
57  
58  
59  
60

1  
2  
3 1.40 (95% CI 1.24 to 1.51); although this was primarily among those who were newly  
4  
5 diagnosed as needing isolation OR 1.75 (95% CI 1.60 to 1.92,  $p < 0.01$ ) rather than  
6  
7 those who had been under contact precautions for their entire stay OR 0.97 (95% CI  
8  
9 0.86 to 1.09,  $p = 0.60$ ).[17] Another study showed no difference in the median values  
10  
11 for the Hospital Anxiety and Depression Scale anxiety or depression scores (HADS-A  
12  
13 and -D), or the EuroQol Visual Analogue Scale EQ VAS scores.[42]  
14  
15  
16  
17  
18

19 For non-psychological outcomes, using a difference in the risk of +/- 20% of an event  
20  
21 as being a measure of clinical significance it appears there was a trend for less  
22  
23 attention to be given to, and for more errors to occur in those who were isolated.  
24  
25 However, again there was wide variation between studies. Data on these outcomes  
26  
27 are given in Figures 5 and 6, and the non-clinically significant risks in the  
28  
29 Supplementary Figure 1. For those outcomes associated with quality, the median risk  
30  
31 ratio (with positive outcomes reversed so a higher risk ratio is associated with a worse  
32  
33 outcome) was 0.94 (IQR 0.92 to 0.98), satisfaction 0.95 (IQR 0.89 to 1.01) and  
34  
35 adverse events was 1.27 (0.91 to 2.5). The minimum and maximum risk ratio for  
36  
37 each category was 0.49 and 1.72; 0.3 and 8; and 0.3 and 18 respectively.  
38  
39  
40  
41  
42  
43  
44

45 [INSERT FIGURES 5 and 6 HERE]  
46  
47  
48

49 Figure 5. Risk ratio of non-psychological events in those isolated versus not isolated  
50  
51 with a RR of  $\leq 0.8$  or  $\geq 1.2$   
52  
53

54 \* outcome was measured in rate per 100 admissions  
55  
56  
57  
58  
59  
60



1  
2  
3 Figure 6. Standardised mean difference of non-psychological scores in those isolated  
4 versus those not isolated  
5  
6

7 FIM – functional independence measure  
8  
9

10  
11  
12 A study not giving raw data which looked at the rates of falls and pressure ulcers  
13 before and after a policy change that resulted in the discontinuation of contact  
14 precautions for patients with methicillin resistant *Staphylococcus aureus* (MRSA) or  
15 vancomycin resistant enterococci (VRE) found that falls and pressure ulcers were  
16 more common among those with MRSA or VRE both before the change (when they  
17 were in isolation) and afterwards (when they were not). Before the change the number  
18 of falls was 4.57 vs 2.04 per 1000 patient-days respectively ( $p < 0.0001$ ) and pressure  
19 ulcers 4.87 vs 1.22 per 1000 patient-days ( $p < 0.0001$ ). After the policy change the  
20 same numbers were falls 4.82 vs 2.10 ( $p < 0.0001$ ) and pressure ulcers 4.17 vs 1.19 per  
21 1000 patient-days ( $p < 0.0001$ ).[39] Other studies found that staff spent less time with  
22 those on contact precautions: internal medicine interns spent less time with their  
23 isolated patients compared to non-isolated patients, the median times being 5.2 and  
24 6.9 minutes respectively ( $p < 0.001$ )[38]; while the mean number of contacts per hour  
25 with healthcare workers was 2.1 compared to 4.2 in those not isolated ( $p = 0.03$ ),  
26 although the duration was longer at 4.5 minutes compared to 2.8 ( $p = 0.6$ ).[40]  
27  
28  
29  
30  
31  
32  
33  
34  
35  
36  
37  
38  
39  
40  
41  
42  
43  
44  
45  
46  
47  
48

49 **Discussion**  
50

51 Current recommendations say that contact precautions should include a single room,  
52 with personal protective equipment consisting of a gown and gloves for all patient  
53 contacts or contacts with potentially contaminated environmental areas.[1] This  
54 review has shown that there are a number of apparently negative aspects to contact  
55  
56  
57  
58  
59  
60

1  
2  
3 precautions, in particular with regards to psychological effects and a reduction in the  
4 quality of some aspects of care. These data come from studies carried out in a variety  
5 of countries and different types of facilities; although there are few data from  
6 particularly vulnerable populations such as the elderly.  
7  
8  
9  
10  
11  
12

13  
14 Although at times there are discussions as to the necessity of contact precautions for  
15 drug resistant organisms, with some arguing that there is mixed evidence for or  
16 against their use[49] another recent review has concluded that they are of great  
17 importance in the control of epidemic and endemic multidrug-resistant  
18 microorganisms.[50] The ethics of using contact precautions and other forms of  
19 isolation rely on a positive assessment of the balance between the risks and benefits of  
20 this to the individual concerned and that of the broader population of patients and  
21 staff.[51] However, even when this assessment is positive, it is important to ensure  
22 that any harm to the individual is minimised.  
23  
24  
25  
26  
27  
28  
29  
30  
31  
32  
33  
34  
35  
36  
37

38 One way of balancing the various priorities is to use the GRADE Evidence to  
39 Decision Framework, which provides criteria for making recommendations at the  
40 individual, group and policy-levels, and provides a number of highly patient focussed  
41 criteria for doing this. In addition to the certainty of evidence and resource  
42 requirements, it also requires consideration of: the balance of desirable and  
43 undesirable effects; the impact upon equity; and the feasibility and acceptability of the  
44 intervention.[52] The last two of these might have very different outcomes when  
45 considered at the population and individual levels; and there is certainly evidence here  
46 that for the individual patient the balance of desirable and undesirable effects might  
47 be very different to that of the broader population.  
48  
49  
50  
51  
52  
53  
54  
55  
56  
57  
58  
59  
60

1  
2  
3  
4  
5  
6  
7  
8  
9  
10  
11  
12  
13  
14  
15  
16  
17  
18  
19  
20  
21  
22  
23  
24  
25  
26  
27  
28  
29  
30  
31  
32  
33  
34  
35  
36  
37  
38  
39  
40  
41  
42  
43  
44  
45  
46  
47  
48  
49  
50  
51  
52  
53  
54  
55  
56  
57  
58  
59  
60

However, within the broad population of infected or potentially infected patients, some groups might have different needs. For example a study of people isolated for MERS found that while access to telephones reduced anxiety and anger; access to email, text and internet increased these.[53] This was not an area investigated in any depth in these studies. Another area where information may be lacking is that of age, as older people in particular might feel sadness and loneliness more; and gender, as qualitative data suggest that women in isolation were more concerned about precautions and transmission while men were more resigned, rational and tended to cope better.[54]

In some countries, such as the United States single-rooms have become the standard for new hospitals and so one might expect fewer adverse effects if everyone is in a single room, this being the norm. However it may be that a single room is necessary but not sufficient for these findings, and that it is the combination of a single room with an infection that leads to these results. Certainly it is far from clear that the long list of advantages claimed for single rooms which include reduced stress, the ability to deliver better care, and a lower probability of dietary or medication errors apply to this group of patients.[55]

Caring for patients in single-rooms does have many challenges, but there is evidence that these can be mitigated in a general population;[9] however the expanding literature on how this can be done in a general population does not necessarily apply here due to the necessity of isolation procedures which are, by design, 'a barrier'. Therefore patients' needs for greater social interaction will need a solution quite

1  
2  
3 different from that which might be used for a different patient population, and the  
4  
5 benefit of choice about this which single rooms offer does not apply here.[56]  
6  
7  
8  
9

10 Although this review has quantified the extent of the problem, we have not been able  
11  
12 to find solutions in the literature. Care might be improved through increased staff  
13  
14 attention with more resources being allocated to these patients, although the extra cost  
15  
16 of contact precautions is already considerable, one estimate being that it was an extra  
17  
18 \$158.90 (95% CI \$124.90 to \$192.80) per patient day.[57] Alternatively new ways of  
19  
20 working might be developed, perhaps using technology to mitigate some of these  
21  
22 problems. Technology might be particularly useful in reducing adverse events such  
23  
24 as medication or clinical errors; although increasing satisfaction and some areas of  
25  
26 quality are more likely to be achieved by increasing the availability of staff and other  
27  
28 people.  
29  
30  
31  
32  
33  
34

### 35 Study strengths and limitations

36  
37 This review suggests that infectious isolation has a number of negative effects on  
38  
39 patients. Because this evidence is comprised of cohort and case-control studies, a  
40  
41 claim for a causal relationship can not be made on this evidence, although the strong  
42  
43 and consistent effects across the studies may increase the confidence in this  
44  
45 relationship. There are some qualitative data, although more in-depth mixed-methods  
46  
47 data where those reporting negative effects are questioned about them would  
48  
49 strengthen the evidence on this. In some cases large effect sizes were accompanied  
50  
51 by very wide confidence intervals, suggesting that studies were underpowered, thus  
52  
53 studies with larger sample sizes would be useful. It would also be useful if there were  
54  
55 more consistent methods of examining and reporting these data, particularly outside  
56  
57  
58  
59  
60

1  
2  
3 of the realms of depression and anxiety where the variety of methods makes analysis  
4  
5 of the body of evidence difficult.  
6  
7  
8  
9

10 Although these data suggest that there is a problem, there is a clear gap both in what  
11  
12 we know about improving the experience of isolation and what can be done in  
13  
14 practical terms to make it more tolerable for patients and their families. In particular  
15  
16 older people who may be most vulnerable to these negative effects were under-  
17  
18 represented in these studies; and this group are likely to represent an increasingly  
19  
20 large proportion of those isolated. Lastly the use of isolation may need to increase if  
21  
22 the current trends of antimicrobial resistance continue.  
23  
24  
25  
26  
27  
28  
29

### 30 Contributors

31  
32 EP, DG and JC conceived the review, EP conducted the search, EP and DG examined  
33  
34 the studies and extracted data, EP undertook the quantitative analysis, EP, DG and JC  
35  
36 undertook the qualitative analysis and wrote the discussion.  
37  
38  
39  
40  
41

### 42 Funding

43  
44 This research received no specific grant from any funding agency in the public,  
45  
46 commercial or not-for-profit sector.  
47  
48  
49  
50

### 51 Competing interests statement

52  
53 No authors have any competing interests to declare.  
54  
55  
56  
57  
58  
59  
60

1  
2  
3  
4  
5  
6  
7  
8  
9  
10  
11  
12  
13  
14  
15  
16  
17  
18  
19  
20  
21  
22  
23  
24  
25  
26  
27  
28  
29  
30  
31  
32  
33  
34  
35  
36  
37  
38  
39  
40  
41  
42  
43  
44  
45  
46  
47  
48  
49  
50  
51  
52  
53  
54  
55  
56  
57  
58  
59  
60

Data Availability

All data relevant to the study are included in the article or uploaded as supplementary information.

For peer review only

## References

- 1 Centres for Disease Control and Prevention. Transmission-Based Precautions | Basics | Infection Control | CDC. 2007. <https://www.cdc.gov/infectioncontrol/basics/transmission-based-precautions.html> (accessed 9 Feb 2019).
- 2 Barlow GD, Knight J, McKay I, *et al.* An audit of the use of side- and isolation room facilities in a UK teaching hospital. *J Hosp Infect* 2006;**62**:110–2. doi:10.1016/j.jhin.2005.05.006
- 3 Fusco FM, Puro V, Baka A, *et al.* Isolation rooms for highly infectious diseases: an inventory of capabilities in European countries. *J Hosp Infect* 2009;**73**:15–23. doi:10.1016/j.jhin.2009.06.009
- 4 Damji S, Barlow GD, Patterson L, *et al.* An audit of the use of isolation facilities in a UK National Health Service trust. *J Hosp Infect* 2005;**60**:213–7. doi:10.1016/j.jhin.2004.11.013
- 5 Wigglesworth N, Wilcox MH. Prospective evaluation of hospital isolation room capacity. *J Hosp Infect* 2006;**63**:156–61. doi:10.1016/j.jhin.2006.02.008
- 6 Gould DJ, Drey NS, Chudleigh J, *et al.* Isolating infectious patients: organizational, clinical, and ethical issues. *Am J Infect Control* 2018;**46**:e65–9. doi:10.1016/j.ajic.2018.05.024
- 7 Dettenkofer M, Wenzler S, Amthor S, *et al.* Does disinfection of environmental surfaces influence nosocomial infection rates? A systematic review. *Am J Infect Control* 2004;**32**:84–9. doi:10.1016/j.ajic.2003.07.006

- 1  
2  
3 8 Zingg W, Holmes A, Dettenkofer M, *et al.* Hospital organisation, management,  
4 and structure for prevention of health-care-associated infection: a systematic  
5 review and expert consensus. *Lancet Infect Dis* 2015;**15**:212–24.  
6  
7 doi:10.1016/S1473-3099(14)70854-0  
8  
9  
10  
11  
12  
13 9 Simon M, Maben J, Murrells T, *et al.* Is single room hospital accommodation  
14 associated with differences in healthcare-associated infection, falls, pressure  
15 ulcers or medication errors? A natural experiment with non-equivalent controls.  
16  
17 *Journal of Health Services Research & Policy* 2016;**21**:147–55.  
18  
19 doi:10.1177/1355819615625700  
20  
21  
22  
23  
24  
25  
26 10 Barratt RL, Shaban R, Moyle W. Patient experience of source isolation: lessons  
27 for clinical practice. *Contemp Nurse* 2011;**39**:180–93. doi:10.5172/conu.2011.180  
28  
29  
30  
31  
32 11 Abad C, Fearday A, Safdar N. Adverse effects of isolation in hospitalised  
33 patients: a systematic review. *Journal of Hospital Infection* 2010;**76**:97–102.  
34  
35 doi:10.1016/j.jhin.2010.04.027  
36  
37  
38  
39  
40 12 Moher D, Liberati A, Tetzlaff J, *et al.* Preferred reporting items for systematic  
41 reviews and meta-analyses: the PRISMA statement. *BMJ* 2009;**339**:b2535.  
42  
43 doi:10.1136/bmj.b2535  
44  
45  
46  
47 13 World Health Organization. *Global action plan on antimicrobial resistance*.  
48  
49 *World Health Organization*. Geneva, Switzerland: : World Health Organization  
50  
51 2015. <http://www.who.int/iris/handle/10665/193736>  
52  
53  
54  
55 14 R Core Team. *R: A language and environment for statistical computing*. Vienna,  
56  
57 Austria: 2018. <https://www.R-project.org/>  
58  
59  
60



- 1  
2  
3 15 Schwarzer G. meta: An R package for meta-analysis. *R News* 2007;**7**:40–5.  
4  
5  
6  
7 16 Viechtbauer W. Conducting Meta-analyses in R with the R metafor package. *J*  
8  
9 *Stat Soft* 2010;**36**. doi:10.18637/jss.v036.i03  
10  
11  
12 17 Day HR, Perencevich EN, Harris AD, *et al*. Association between contact  
13  
14 precautions and delirium at a tertiary care center. *Infection Control & Hospital*  
15  
16 *Epidemiology* 2012;**33**:34–9. doi:10.1086/663340  
17  
18  
19 18 Day HR, Perencevich EN, Harris AD, *et al*. Depression, anxiety, and moods of  
20  
21 hospitalized patients under contact precautions. *Infection Control & Hospital*  
22  
23 *Epidemiology* 2013;**34**:251–8. doi:10.1086/669526  
24  
25  
26  
27 19 Lupión-Mendoza C, Antúnez-Domínguez MJ, González-Fernández C, *et al*.  
28  
29 Effects of isolation on patients and staff. *American Journal of Infection Control*  
30  
31 2015;**43**:397–9. doi:10.1016/j.ajic.2015.01.009  
32  
33  
34  
35 20 Soon MML, Madigan E, Jones KR, *et al*. An exploration of the psychologic  
36  
37 impact of contact isolation on patients in Singapore. *American Journal of*  
38  
39 *Infection Control* 2013;**41**:e111–3. doi:10.1016/j.ajic.2013.01.037  
40  
41  
42  
43 21 Tarzi S, Kennedy P, Stone S, *et al*. Methicillin-resistant *Staphylococcus aureus*:  
44  
45 psychological impact of hospitalization and isolation in an older adult population.  
46  
47 *Journal of Hospital Infection* 2001;**49**:250–4. doi:10.1053/jhin.2001.1098  
48  
49  
50  
51 22 Tran K, Bell C, Stall N, *et al*. The Effect of Hospital Isolation Precautions on  
52  
53 Patient Outcomes and Cost of Care: A Multi-Site, Retrospective, Propensity  
54  
55 Score-Matched Cohort Study. *J Gen Intern Med* 2017;**32**:262–8.  
56  
57  
58  
59 doi:10.1007/s11606-016-3862-4  
60

- 1  
2  
3 23 Guilley-Lerondeau B, Bourigault C, Guille des Buttes A-C, *et al.* Adverse effects  
4 of isolation: a prospective matched cohort study including 90 direct interviews of  
5 hospitalized patients in a French University Hospital. *European Journal of*  
6 *Clinical Microbiology & Infectious Diseases* 2017;**36**:75–80.  
7  
8 doi:10.1007/s10096-016-2772-z  
9  
10  
11  
12  
13  
14  
15 24 Mehrotra P, Croft L, Day HR, *et al.* Effects of contact precautions on patient  
16 perception of care and satisfaction: A prospective cohort study. *Infection Control*  
17 *& Hospital Epidemiology* 2013;**34**:1087–93. doi:10.1086/673143  
18  
19  
20  
21  
22  
23 25 Livorsi DJ, Kundu MG, Batteiger B, *et al.* Effect of contact precautions for  
24 MRSA on patient satisfaction scores. *Journal of Hospital Infection* 2015;**90**:263–  
25  
26 6. doi:10.1016/j.jhin.2015.02.007  
27  
28  
29  
30  
31 26 Evans HL, Shaffer MM, Hughes MG, *et al.* Contact isolation in surgical patients:  
32 A barrier to care? *Surgery* 2003;**134**:180–8. doi:10.1067/msy.2003.222  
33  
34  
35  
36  
37 27 Croft LD, Liquori M, Ladd J, *et al.* The effect of contact precautions on frequency  
38 of hospital adverse events. *Infection Control & Hospital Epidemiology*  
39 2015;**36**:1268–74. doi:10.1017/ice.2015.192  
40  
41  
42  
43  
44  
45 28 Saint S, Higgins LA, Nallamothu BK, *et al.* Do physicians examine patients in  
46 contact isolation less frequently? A brief report. *Am J Infect Control*  
47 2003;**31**:354–6.  
48  
49  
50  
51  
52  
53 29 Masse V, Valiquette L, Boukhoudmi S, *et al.* Impact of methicillin resistant  
54 *Staphylococcus aureus* contact isolation units on medical care. *PLoS ONE*  
55 2013;**8**:e57057. doi:10.1371/journal.pone.0057057  
56  
57  
58  
59  
60

- 1  
2  
3 30 Lau D, Majumdar SR, McAlister FA. Patient isolation precautions and 30-day  
4 risk of readmission or death after hospital discharge: a prospective cohort study.  
5  
6 *International Journal of Infectious Diseases* 2016;**43**:74–6.  
7  
8 doi:10.1016/j.ijid.2015.12.018  
9  
10  
11  
12  
13 31 Spence MR, McQuaid M. The interrelationship of isolation precautions and  
14 adverse events in an acute care facility. *American Journal of Infection Control*  
15  
16 2011;**39**:154–5. doi:10.1016/j.ajic.2010.04.213  
17  
18  
19  
20  
21 32 Stelfox HT. Safety of Patients Isolated for Infection Control. *JAMA*  
22  
23 2003;**290**:1899. doi:10.1001/jama.290.14.1899  
24  
25  
26  
27 33 Gammon J. Analysis of the stressful effects of hospitalisation and source isolation  
28 on coping and psychological constructs. *Int J Nurs Pract* 1998;**4**:84–96.  
29  
30  
31  
32 34 Findik UY, Ozbaş A, Cavdar I, *et al.* Effects of the contact isolation application  
33 on anxiety and depression levels of the patients: Effects of the contact isolation  
34 application. *International Journal of Nursing Practice* 2012;**18**:340–6.  
35  
36 doi:10.1111/j.1440-172X.2012.02049.x  
37  
38  
39  
40  
41  
42  
43 35 Kennedy P, Hamilton LR. Psychological impact of the management of  
44 methicillin-resistant *Staphylococcus aureus* (MRSA) in patients with spinal cord  
45 injury. *Spinal Cord* 1997;**35**:617–9.  
46  
47  
48  
49  
50 36 Day HR, Morgan DJ, Himelhoch S, *et al.* Association between depression and  
51 contact precautions in veterans at hospital admission. *American Journal of*  
52  
53 *Infection Control* 2011;**39**:163–5. doi:10.1016/j.ajic.2010.06.024  
54  
55  
56  
57  
58  
59  
60

- 1  
2  
3 37 Colorado B, Del Toro D, Tarima S. Impact of Contact Isolation on FIM Score  
4  
5 Change, FIM Efficiency Score, and Length of Stay in Patients in Acute Inpatient  
6  
7 Rehabilitation Facility. *PM&R* 2014;**6**:988–91. doi:10.1016/j.pmrj.2014.05.017  
8  
9  
10  
11 38 Dashiell-Earp CN, Bell DS, Ang AO, *et al.* Do physicians spend less time with  
12  
13 patients in contact isolation?: a time-motion study of internal medicine interns.  
14  
15 *JAMA Intern Med* 2014;**174**:814–5. doi:10.1001/jamainternmed.2014.537  
16  
17  
18  
19 39 Gandra S, Barysaukas CM, Mack DA, *et al.* Impact of contact precautions on  
20  
21 falls, pressure ulcers and transmission of MRSA and VRE in hospitalized  
22  
23 patients. *Journal of Hospital Infection* 2014;**88**:170–6.  
24  
25 doi:10.1016/j.jhin.2014.09.003  
26  
27  
28  
29 40 Kirkland KB, Weinstein JM. Adverse effects of contact isolation. *Lancet*  
30  
31 1999;**354**:1177–8. doi:10.1016/S0140-6736(99)04196-3  
32  
33  
34  
35 41 Day HR, Perencevich EN, Harris AD, *et al.* Do contact precautions cause  
36  
37 depression? A two-year study at a tertiary care medical centre. *Journal of*  
38  
39 *Hospital Infection* 2011;**79**:103–7. doi:10.1016/j.jhin.2011.03.026  
40  
41  
42  
43 42 Wassenberg MWM, Severs D, Bonten MJM. Psychological impact of short-term  
44  
45 isolation measures in hospitalised patients. *Journal of Hospital Infection*  
46  
47 2010;**75**:124–7. doi:10.1016/j.jhin.2010.01.023  
48  
49  
50  
51 43 Wilson DB. Practical Meta-Analysis Effect Size Calculator [Online calculator].  
52  
53 Practical Meta-Analysis Effect Size Calculator [Online calculator].  
54  
55 2019.[https://campbellcollaboration.org/research-resources/effect-size-](https://campbellcollaboration.org/research-resources/effect-size-calculator.html)  
56  
57 [calculator.html](https://campbellcollaboration.org/research-resources/effect-size-calculator.html) (accessed 14 Aug 2019).  
58  
59  
60

- 1  
2  
3 44 Chittick P, Koppisetty S, Lombardo L, *et al.* Assessing patient and caregiver  
4 understanding of and satisfaction with the use of contact isolation. *American*  
5  
6 *Journal of Infection Control* 2016;**44**:657–60. doi:10.1016/j.ajic.2015.12.033  
7  
8  
9  
10  
11 45 Davies H, Rees J. Psychological effects of isolation nursing (1): Mood  
12 disturbance. *Nurs Stand* 2000;**14**:35–8. doi:10.7748/ns2000.03.14.28.35.c2799  
13  
14  
15  
16 46 Rees J, Davies HR, Birchall C, *et al.* Psychological effects of source isolation  
17 nursing (2): Patient satisfaction. *Nurs Stand* 2000;**14**:32–6.  
18  
19  
20  
21  
22  
23  
24  
25 47 Wilkins EG, Ellis ME, Dunbar EM, *et al.* Does isolation of patients with  
26  
27  
28  
29  
30  
31 48 Wells G, Shea B, O’Connell D, *et al.* The Newcastle-Ottawa Scale (NOS) for  
32  
33  
34  
35  
36  
37  
38  
39  
40  
41 49 Cohen CC, Cohen B, Shang J. Effectiveness of contact precautions against  
42  
43  
44  
45  
46  
47  
48  
49  
50  
51 50 Landelle C, Pagani L, Harbarth S. Is patient isolation the single most important  
52  
53  
54  
55  
56  
57  
58  
59  
60

- 1  
2  
3 51 Santos RP, Mayo TW, Siegel JD. Healthcare epidemiology: Active surveillance  
4 cultures and contact precautions for control of multidrug-resistant organisms:  
5 Ethical considerations. *Clinical Infectious Diseases* 2008;**47**:110–6.  
6  
7  
8  
9  
10  
11  
12  
13  
14 52 Alonso-Coello P, Oxman AD, Moberg J, *et al.* GRADE Evidence to Decision  
15 (EtD) frameworks: a systematic and transparent approach to making well  
16 informed healthcare choices. 2: Clinical practice guidelines. *BMJ* 2016;:i2089.  
17  
18  
19  
20  
21  
22  
23  
24 53 Jeong H, Yim HW, Song Y-J, *et al.* Mental health status of people isolated due to  
25 Middle East Respiratory Syndrome. *Epidemiology and Health* 2016;**38**:e2016048.  
26  
27  
28  
29  
30  
31  
32  
33  
34 54 Madsen A. Experience of source isolation during hospitalization – a qualitative  
35 study. *Antimicrobial Resistance and Infection Control* 2015;**4**. doi:10.1186/2047-  
36 2994-4-S1-P95  
37  
38  
39  
40  
41  
42  
43  
44  
45  
46  
47  
48  
49  
50  
51  
52  
53  
54  
55  
56  
57  
58  
59  
60
- 55 Rechel B, European Health Property Network, European Observatory on Health  
Systems and Policies, editors. *Investing in hospitals of the future*. Copenhagen: :  
World Health Organization, European Observatory on Health Systems and  
Policies 2009.
- 56 Persson E, Anderberg P, Kristensson Ekwall A. A room of one's own - Being  
cared for in a hospital with a single-bed room design. *Scandinavian Journal of  
Caring Sciences* 2015;**29**:340–6. doi:10.1111/scs.12168

1  
2  
3 57 Roth JA, Hornung-Winter C, Radicke I, *et al.* Direct Costs of a Contact Isolation

4  
5 Day: A Prospective Cost Analysis at a Swiss University Hospital. *Infection*

6  
7  
8 *Control & Hospital Epidemiology* 2018;**39**:101–3. doi:10.1017/ice.2017.258  
9  
10  
11  
12  
13  
14  
15  
16  
17  
18  
19  
20  
21  
22  
23  
24  
25  
26  
27  
28  
29  
30  
31  
32  
33  
34  
35  
36  
37  
38  
39  
40  
41  
42  
43  
44  
45  
46  
47  
48  
49  
50  
51  
52  
53  
54  
55  
56  
57  
58  
59  
60

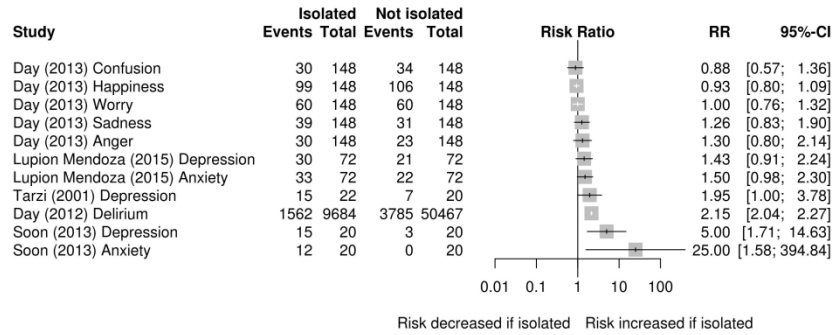

Figure 1. Risk ratio of psychological events in those isolated versus not isolated

279x127mm (300 x 300 DPI)



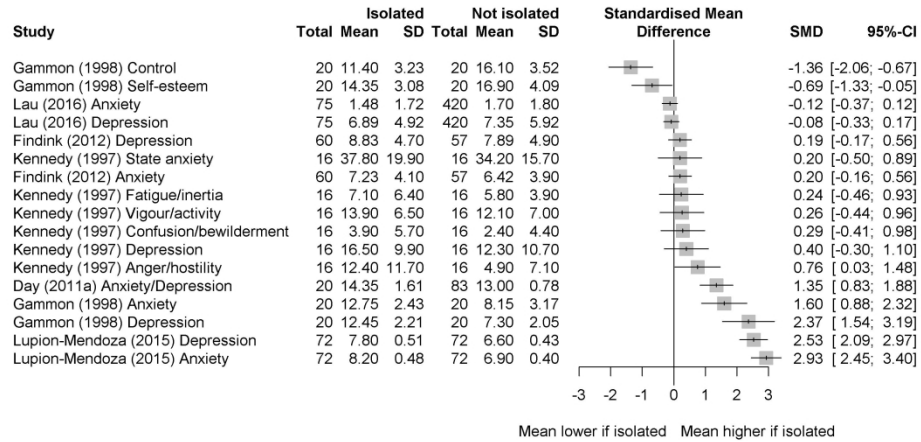

Figure 2. Standardised mean difference of psychological scores in those isolated versus those not isolated

279x152mm (300 x 300 DPI)

1  
2  
3  
4  
5  
6  
7  
8  
9  
10  
11  
12  
13  
14  
15  
16  
17  
18  
19  
20  
21  
22  
23  
24  
25  
26  
27  
28  
29  
30  
31  
32  
33  
34  
35  
36  
37  
38  
39  
40  
41  
42  
43  
44  
45  
46  
47  
48  
49  
50  
51  
52  
53  
54  
55  
56  
57  
58  
59  
60

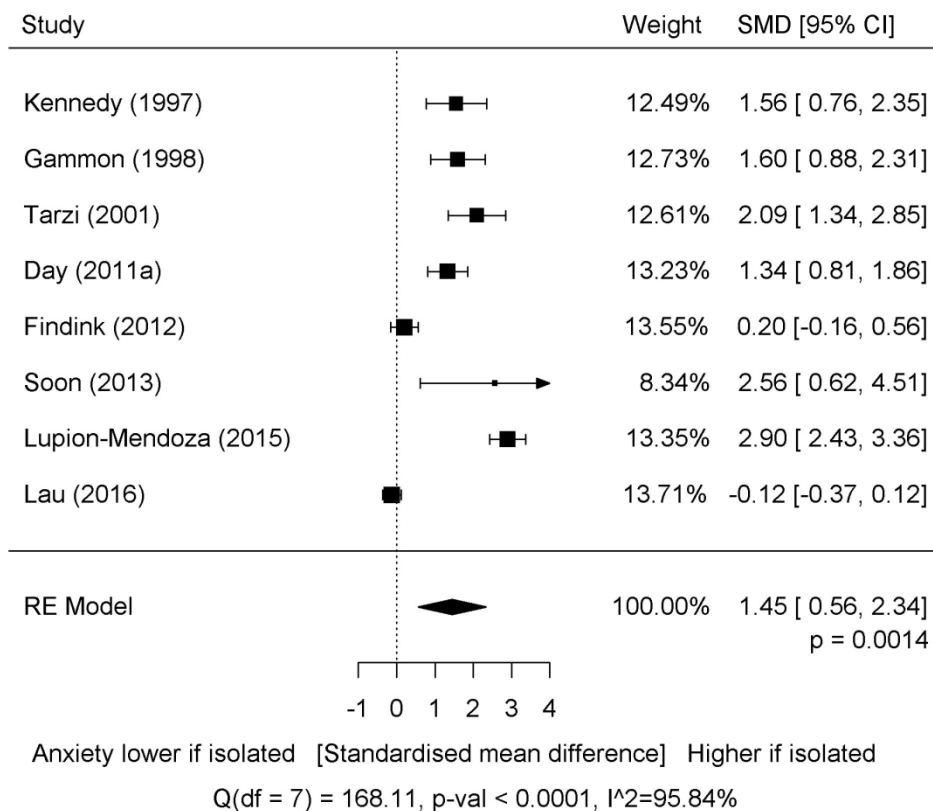

Figure 3. Meta-analysis of the standardised mean difference of anxiety in those isolated versus those not isolated

169x169mm (300 x 300 DPI)

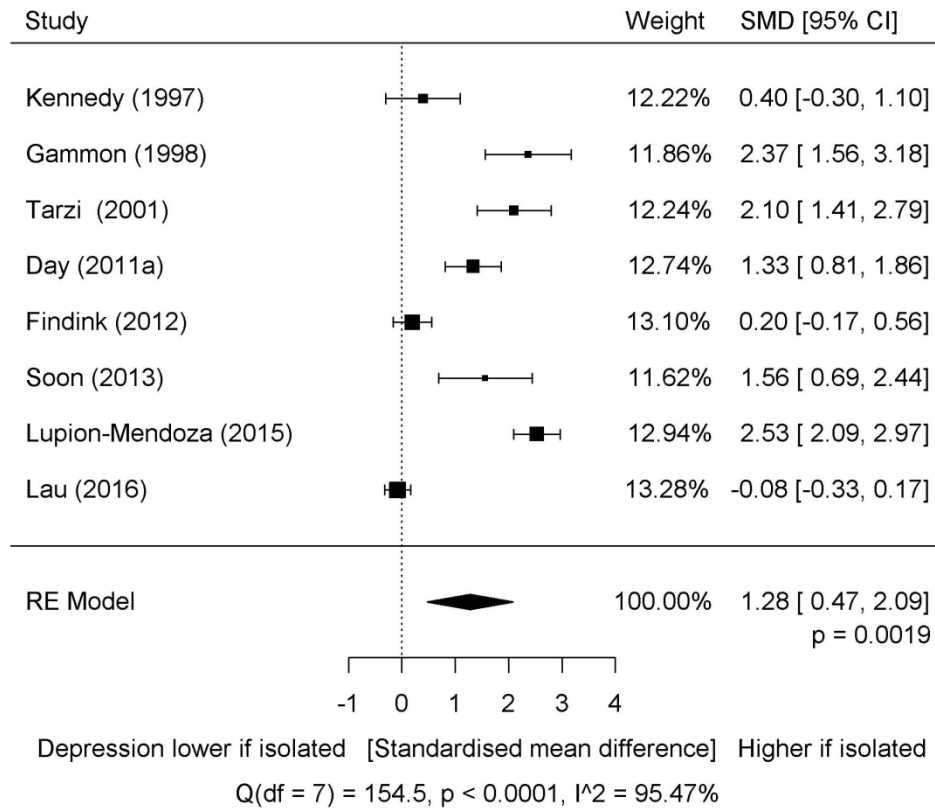

Figure 4. Meta-analysis of the standardised mean difference of depression in those isolated versus those not isolated

169x169mm (300 x 300 DPI)

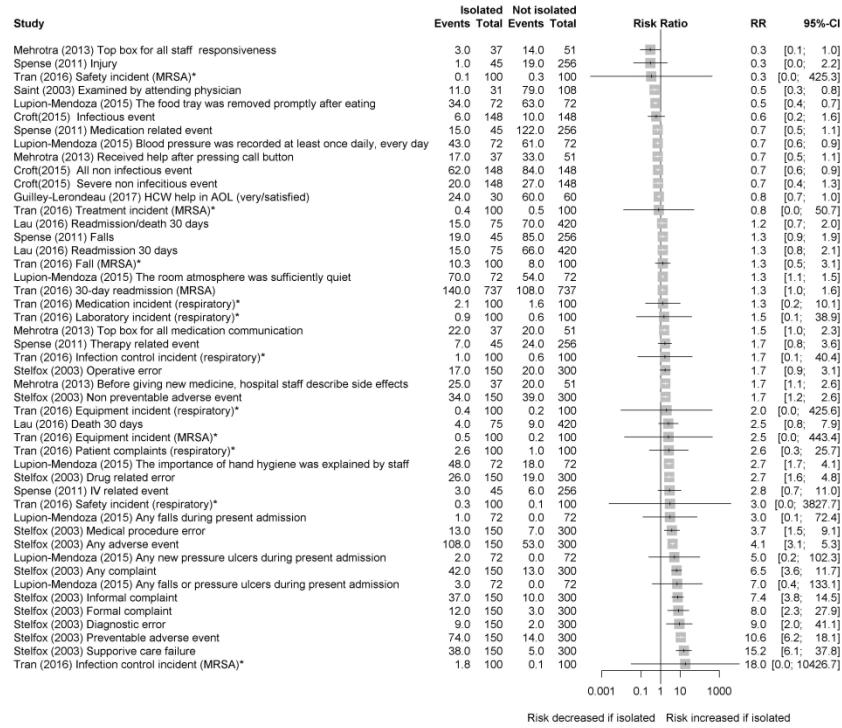

Figure 5. Risk ratio of non-psychological events in those isolated versus not isolated with a RR of  $\leq 0.8$  or  $\geq 1.2$

381x296mm (300 x 300 DPI)

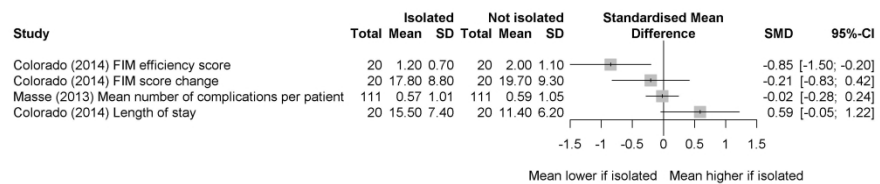

Figure 6. Standardised mean difference of non-psychological scores in those isolated versus those not isolated

321x127mm (300 x 300 DPI)

**Characteristics of studies**

| Reference            | Study type                                                                                                                                                                   | Isolated                                                                                                                                                          | Non isolated                                                                                                                                      |
|----------------------|------------------------------------------------------------------------------------------------------------------------------------------------------------------------------|-------------------------------------------------------------------------------------------------------------------------------------------------------------------|---------------------------------------------------------------------------------------------------------------------------------------------------|
| Colorado (2014)      | Retrospective matched case control study.<br>Rehabilitation facility- tertiary centre<br>United States<br>July 2009 to December 2010                                         | N20<br>Patients in contact isolation                                                                                                                              | N=20<br>Matched to patients not in contact isolation based on age, rehabilitation diagnosis, and type of insurance                                |
| Croft (2015)         | Prospective cohort<br>Medical or surgical inpatients admitted to non-intensive care unit hospital wards, United States.<br>January to November 2010.                         | N=148<br>Patients on contact precautions<br>Age: 52 (13.8)<br>% male: 53.4                                                                                        | N=148<br>Individually matched by after an initial 3-day length of stay to patients not on contact precautions.<br>Age 52.3 (14.6)<br>% male: 46.6 |
| Dashiell-Earp (2014) | Collected real-time data on the location of 15 internal medicine interns, United States.<br>October 1, 2012 to December 31, 2012                                             | 1156 encounters                                                                                                                                                   | 2467 encounters                                                                                                                                   |
| Day (2011)           | Patients admitted to the general acute care units, United States.<br>June 1, 2009 to October 30, 2009                                                                        | N=20<br>Age: 68.5 (14.7)<br>% male: 85.0                                                                                                                          | N=83<br>Age: 63.9 (12.6)<br>% male: 95.2                                                                                                          |
| Day (2011)           | A two-year retrospective cohort<br>Tertiary care, United States..<br>All general inpatients over 18 years hospitalized for >24 h<br>February 1, 2007 to January 31, 2009.    | Contact precautions private room when possible, can be cohorted<br>General N = 3138<br>Age: 51.2 (17.5) % male 58.9<br>ITU N=1694<br>Age: 54.9 (17.5) % male 61.0 | General N = 25 426<br>Age: 49.6 (19.0) % male 46.3%<br>ICU N = 5 854<br>Age: 56.0 (17.7)<br>% male 59.7                                           |
| Day (2012)           | 2-year retrospective cohort study of all non-psychiatric hospital admissions >18 years, United States.<br>February 1, 2007 to January 31, 2009                               | N = 9 684<br>Contact precautions as above<br>Mean age: 50.1 (18.8) % male 51.4                                                                                    | N = 50 458<br>Mean age: 52.3 (16.9)<br>% males 59.1                                                                                               |
| Day (2013)           | Longitudinal frequency-matched cohort study of patients admitted to general medical and surgical units, United States. Day 0, day 3 then weekly.<br>January to November 2010 | N = 148<br>Mean age: 52.0 (13.9)<br>% male 58.1                                                                                                                   | N = 148<br>Mean age: 52.3 (14.6)<br>% male 50.7                                                                                                   |

|                                        |                          |                                                                                                                                                                  |                                                                                                                   |                                                                                                                      |
|----------------------------------------|--------------------------|------------------------------------------------------------------------------------------------------------------------------------------------------------------|-------------------------------------------------------------------------------------------------------------------|----------------------------------------------------------------------------------------------------------------------|
| 1<br>2<br>3<br>4<br>5                  | Evans (2003)             | Prospective observation; survey; retrospective review, United States. Tertiary care. June and July 2001                                                          | N 48<br>Mean age: 47.8 (2)<br>% male 85%                                                                          | N = 48<br>Mean age: 58.3 (2.4)<br>% male 75%                                                                         |
| 6<br>7<br>8<br>9<br>10                 | Findink (2012)           | Non-random quasi-experiment, Turkey<br>Age 18 to 65 Administered day 5<br>January 1, 2009 to December 31, 2009                                                   | N = 60<br>Mean age: 53.95 (18.4)<br>% male 75%                                                                    | N = 57<br>Mean age: 56.14 (17.1)<br>% male 76.3%                                                                     |
| 11<br>12<br>13<br>14<br>15<br>16<br>17 | Gammon (1998)            | Quasi experiment<br>Selected if last two numbers on their case notes even.<br>Two large District General Hospitals and one elderly care hospital, United Kingdom | N = 20<br>Placed in isolation for a minimum of 7days<br>Mean age: 61 years<br>% male: 65                          | N = 20<br>Mean age: 52 years<br>% male: 55                                                                           |
| 18<br>19<br>20<br>21<br>22<br>23       | Gandra (2014)            | Retrospective hospital-wide cohort study, United States. All patients admitted to medical-surgical inpatient units<br>November 1, 2009 to October 31, 2011       | Falls N=77<br>Mean age: 66.1 (14.3)<br>% male: 61%<br>Pressure ulcers N=82<br>Mean age: 64.5 (15.5)<br>% male: 63 | Falls N=82<br>Mean age: 63.7 (15.8)<br>% male: 51 (62%)<br>Pressure ulcers N=71<br>Mean age: 65.7 (15)<br>% male: 57 |
| 24<br>25<br>26<br>27<br>28             | Guilley-Lerondeau (2017) | Matched cohort study with prospective inclusions<br>Interview 3 days after commencing<br>General sample. France<br>March to July 2012                            | N=30<br>First prescription of isolation precaution<br>Median age (range) 69 (32 to 91)<br>% male 47               | N=60<br>Median age (range) 64 (24 to 91)<br>% male 53                                                                |
| 29<br>30<br>31<br>32<br>33             | Kennedy (1997)           | Cross-sectional matched-control study, United Kingdom.<br>May 1994 to November 1996                                                                              | N = 16<br>Isolated as a result of being MRSA<br>Mean age: 31.1<br>All male                                        | N = 16<br>Matched for age, sex, level of injury, and time since admission or injury                                  |
| 34<br>35                               | Kirkland (1999)          | Observational study - 7 months<br>Medical intensive-care, United States                                                                                          | N=14                                                                                                              | N=21                                                                                                                 |
| 36<br>37<br>38<br>39                   | Lau (2016)               | Prospective cohort study.<br>Adult patients discharged from internal medicine wards, Canada<br>October 2013 to November 2014,                                    | N=75<br>Mean age 60.35 (17.83)<br>% male 59                                                                       | N=420<br>Mean age 63.31 (18.69)<br>% male 48%                                                                        |
| 40<br>41<br>42<br>43                   | Livorsi (2015)           | Case-control study<br>Retrospective January 1, 2012 to                                                                                                           | N = 70<br>On contact precautions for MRSA throughout                                                              | N = 139<br>No significant differences between isolated and                                                           |

1  
2  
3  
4  
5  
6  
7  
8  
9  
10  
11  
12  
13  
14  
15  
16  
17  
18  
19  
20  
21  
22  
23  
24  
25  
26  
27  
28  
29  
30  
31  
32  
33  
34  
35  
36  
37  
38  
39  
40  
41  
42  
43  
44  
45  
46  
47

|                       |                                                                                                                                                      |                                                                                                                                                                                                    |                                                                                       |
|-----------------------|------------------------------------------------------------------------------------------------------------------------------------------------------|----------------------------------------------------------------------------------------------------------------------------------------------------------------------------------------------------|---------------------------------------------------------------------------------------|
|                       | May 31, 2012/prospective June 1, 2012 to March 31, 2013<br>'safety-net facility', United States                                                      | their hospital stay. Found to be MRSA positive during a previous hospitalization or as an outpatient, not current case                                                                             | non-isolated patients                                                                 |
| Lupi3n-Mendoza (2015) | Matched case-control study<br>Tertiary hospital, Spain<br>2011 and 2012                                                                              | N = 72<br>Adult patients admitted in isolation for =>5 days.<br>Median age (range) 62 (21-93)<br>% male 73%                                                                                        | N = 72<br>Median age (range) 69 (23-89),<br>% male 68.1%                              |
| Massee (2013)         | Retrospective case-control<br>Tertiary care, Canada                                                                                                  | N = 111<br>Matched MRSA patients with an admission diagnosis of heart failure or COPD to similar non-isolated controls<br>Median age (IQR) 80.0 (69.0-86.0)<br>% male 60.4%                        | N = 111<br>Median age (IQR) 80.0 (68.0-86.0)<br>% male 60.4%                          |
| Mehrotra (2013)       | Prospective cohort<br>Admission and on days 3, 7, 14<br>Tertiary centre, United States                                                               | N = 238<br>Segregation into a private or cohorted room<br>Mean age (SD) 52.4 (13.4)<br>% male 55.7                                                                                                 | N = 290<br>Mean age (SD) 52.9 (14.8)<br>% male 48                                     |
| Saint (2003)          | Prospective cohort study<br>2 university-affiliated medical centers, United States.<br>October 1999 to March 2000                                    | N=31                                                                                                                                                                                               | N=108                                                                                 |
| Soon (2013)           | Cross-sectional survey of cases and matched controls<br>Teaching hospital Singapore<br>June and August 2011                                          | N=20<br>Contact isolation in a cohort cubicle for the first time because of colonization or infection with a MDRO for at least 3 days<br>No statistically significant differences in age or gender | N=20                                                                                  |
| Spense (2011)         | Retrospective evaluation of incident reports<br>All patients admitted to acute care facility, United States<br>January 1, 2008 to December 31, 2008. | N=45                                                                                                                                                                                               | N=256                                                                                 |
| Stelfox (2003)        | Case control study<br>Consecutive adults isolated for at least 2 days with MRSA. Canada and United States<br>Controls patients admitted before       | General N = 78<br>Age: 69.6 (17.1)<br>% male: 45%<br>CHF N = 72<br>Age: 66.9 (14.7)                                                                                                                | General N = 156<br>Age: 65.4 (18.2)<br>% male: 51%<br>CHF N = 144<br>Age: 66.0 (14.5) |



|                   |                                                                                                                              |                                                                                                                     |                                                                         |
|-------------------|------------------------------------------------------------------------------------------------------------------------------|---------------------------------------------------------------------------------------------------------------------|-------------------------------------------------------------------------|
|                   | and after.<br>January 1, 1999, to January 1, 2000                                                                            | % male: 58                                                                                                          | % male: 54                                                              |
| Tarzi (2001)      | Cross-sectional matched case-control study<br>Care of the elderly rehabilitation wards, UK                                   | N = 22<br>Had been in isolation for at least two weeks with MRSA<br>Mean age (SD) 80 (8.4)<br>% male 27.3           | N = 20<br>Mean age (SD) 81 (9.1)<br>% male 33.3                         |
| Tran (2017)       | Propensity matched cohort study.<br>General internal medicine services, 3 hospitals, Canada<br>January 2010 to December 2012 | MRSA<br>Age: 69<br>% male 57%<br>Respiratory<br>Age: 71.7<br>% male: 53<br>Isolated for MRSA or respiratory illness | MRSA<br>Age: 69<br>% male 58%<br>Respiratory<br>Age: 70.6<br>% male: 55 |
| Wassenburg (2010) | Cross-sectional matched cohort study<br>Single university hospital,<br>Netherlands<br>November 2006 to February 2007         | N = 42<br>Age: 52 (19)<br>% male: 52                                                                                | N = 84<br>Age: 55 (16)<br>% male: 55                                    |

1  
2  
3  
4  
5  
6  
7  
8  
9  
10  
11  
12  
13  
14  
15  
16  
17  
18  
19  
20  
21  
22  
23  
24  
25  
26  
27  
28  
29  
30  
31  
32  
33  
34  
35  
36  
37  
38  
39  
40  
41  
42  
43  
44  
45  
46  
47

Excluded papers

| Reference             | Reason for exclusion         |
|-----------------------|------------------------------|
| Chittick et al (2016) | No comparative data          |
| Godsell (2013)        | Focussed on HCP              |
| Jeong (2016)          | MERS                         |
| MacKellaig (1986)     | Qualitative                  |
| Madsden (2015)        | Qualitative                  |
| Maunder (2003)        | SARS                         |
| Moran (2009)          | Focus on family centred care |
| Morgan (2011)         | Focus on process measures    |
| Rees (2000a)          | No comparative data          |
| Rees (2000a)          | No comparative data          |
| Simon (2016)          | Before and after             |
| Wilkins (1988)        | No comparative data          |

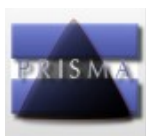

## PRISMA 2009 Flow Diagram

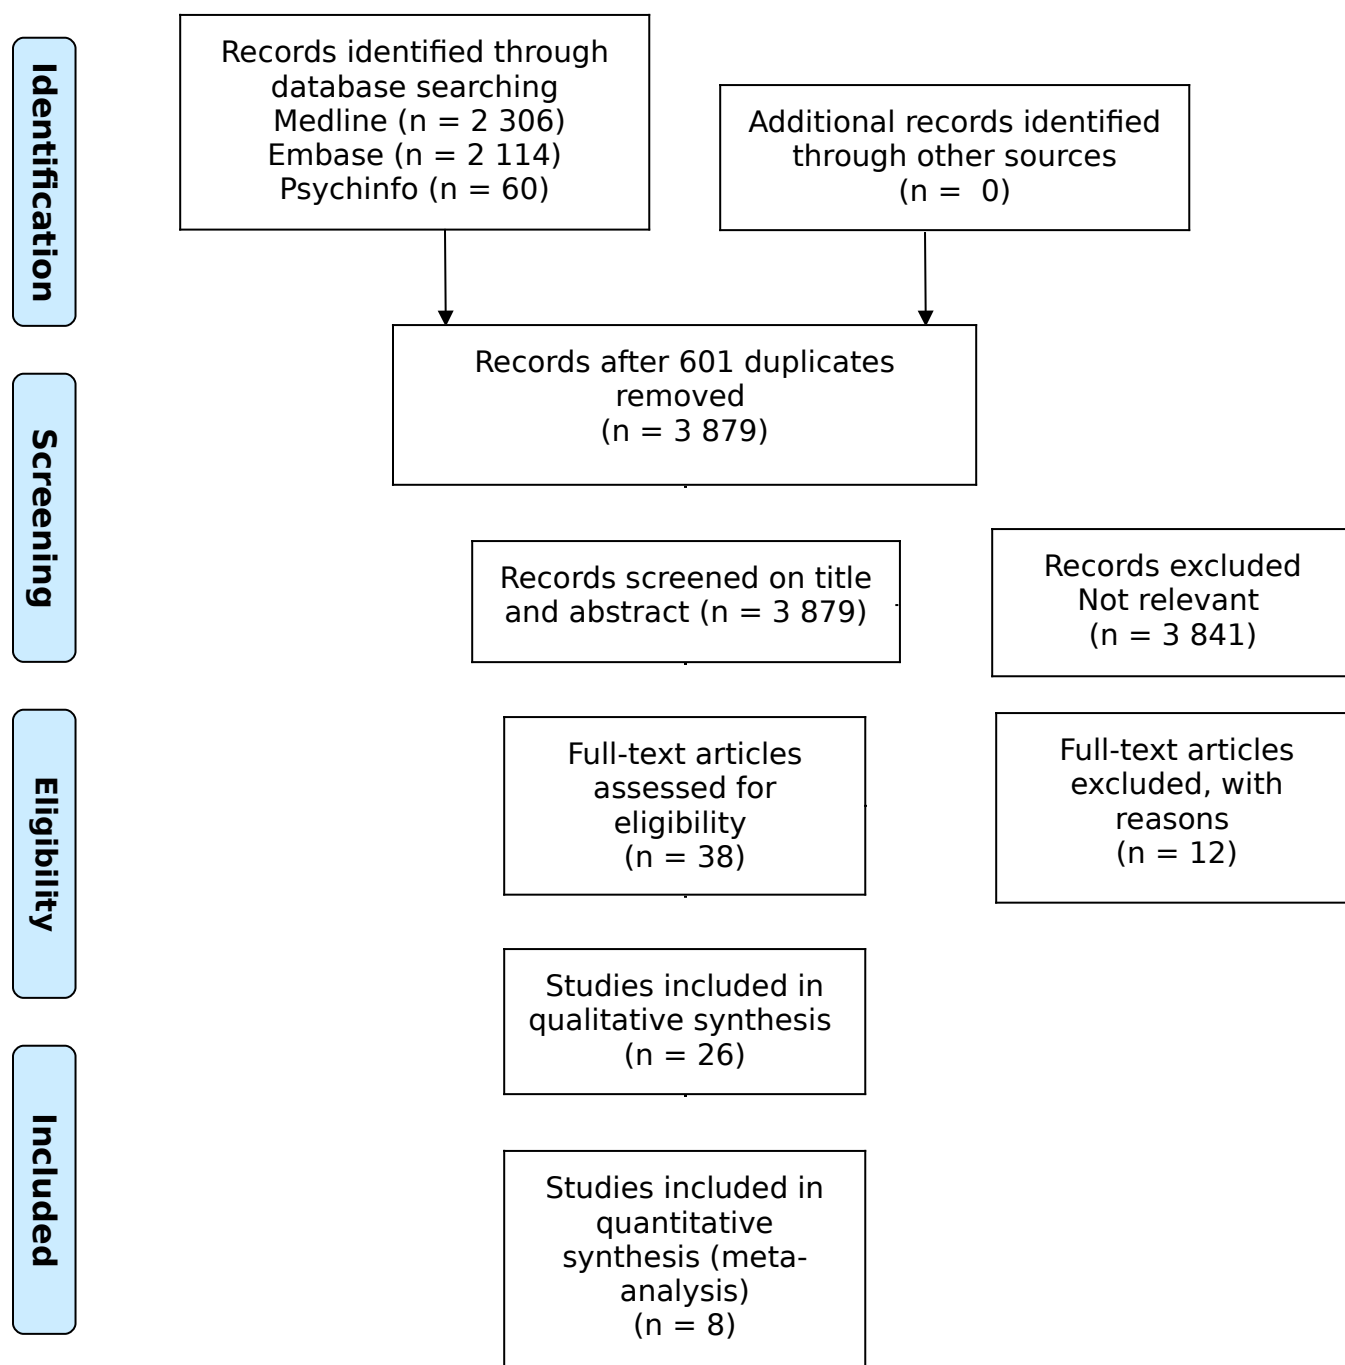

56 From: Moher D, Liberati A, Tetzlaff J, Altman DG, The PRISMA Group (2009). Preferred Reporting Items for Systematic Reviews and Meta-  
57 Analyses: The PRISMA Statement. PLoS Med 6(7): e1000097. doi:10.1371/journal.pmed1000097

58 **For more information, visit [www.prisma-statement.org](http://www.prisma-statement.org).**

59 For peer review only - <http://bmjopen.bmj.com/site/about/guidelines.xhtml>

60

## All RR data

|    | Reference                   | Year |
|----|-----------------------------|------|
| 1  |                             |      |
| 2  |                             |      |
| 3  |                             |      |
| 4  | 1 Croft(2015)               | 2015 |
| 5  | 2 Croft(2015)               | 2015 |
| 6  | 4 Croft(2015)               | 2015 |
| 7  | 9 Guilley-Lerondeau (2017)  | 2017 |
| 8  | 15 Lau (2016)               | 2016 |
| 9  | 16 Lau (2016)               | 2016 |
| 10 | 18 Lau (2016)               | 2016 |
| 11 | 43 Lupion-Mendoza (2015)    | 2015 |
| 12 | 48 Lupion-Mendoza (2015)    | 2015 |
| 13 | 50 Lupion-Mendoza (2015)    | 2015 |
| 14 | 54 Lupion-Mendoza (2015)    | 2015 |
| 15 | 57 Lupion-Mendoza (2015)    | 2015 |
| 16 | 58 Lupion-Mendoza (2015)    | 2015 |
| 17 | 59 Lupion-Mendoza (2015)    | 2015 |
| 18 | 69 Mehrotra (2013)          | 2013 |
| 19 | 71 Mehrotra (2013)          | 2013 |
| 20 | 76 Mehrotra (2013)          | 2013 |
| 21 | 77 Mehrotra (2013)          | 2013 |
| 22 | 85 Stelfox (2003)           | 2003 |
| 23 | 86 Stelfox (2003)           | 2003 |
| 24 | 87 Stelfox (2003)           | 2003 |
| 25 | 88 Stelfox (2003)           | 2003 |
| 26 | 89 Stelfox (2003)           | 2003 |
| 27 | 90 Stelfox (2003)           | 2003 |
| 28 | 91 Stelfox (2003)           | 2003 |
| 29 | 92 Stelfox (2003)           | 2003 |
| 30 | 93 Stelfox (2003)           | 2003 |
| 31 | 94 Stelfox (2003)           | 2003 |
| 32 | 95 Stelfox (2003)           | 2003 |
| 33 | 96 Spense (2011)            | 2011 |
| 34 | 97 Spense (2011)            | 2011 |
| 35 | 98 Spense (2011)            | 2011 |
| 36 | 99 Spense (2011)            | 2011 |
| 37 | 100 Spense (2011)           | 2011 |
| 38 | 102 Saint (2003)            | 2003 |
| 39 | 103 Tran (2016)             | 2016 |
| 40 | 106 Tran (2016)             | 2016 |
| 41 | 107 Tran (2016)             | 2016 |
| 42 | 108 Tran (2016)             | 2016 |
| 43 | 109 Tran (2016)             | 2016 |
| 44 | 113 Tran (2016)             | 2016 |
| 45 | 114 Tran (2016)             | 2016 |
| 46 | 116 Tran (2016)             | 2016 |
| 47 | 117 Tran (2016)             | 2016 |
| 48 | 118 Tran (2016)             | 2016 |
| 49 | 120 Tran (2016)             | 2016 |
| 50 | 122 Tran (2016)             | 2016 |
| 51 | 3 Croft(2015)               | 2015 |
| 52 | 5 Evans (2003)              | 2003 |
| 53 | 6 Evans (2003)              | 2003 |
| 54 | 7 Evans (2003)              | 2003 |
| 55 | 8 Guilley-Lerondeau (2017)  | 2017 |
| 56 | 10 Guilley-Lerondeau (2017) | 2017 |
| 57 | 11 Guilley-Lerondeau (2017) | 2017 |
| 58 |                             |      |
| 59 |                             |      |
| 60 |                             |      |

## All RR data

|    |                          |      |
|----|--------------------------|------|
| 12 | Guilley-Lerondeau (2017) | 2017 |
| 13 | Guilley-Lerondeau (2017) | 2017 |
| 14 | Guilley-Lerondeau (2017) | 2017 |
| 17 | Lau (2016)               | 2016 |
| 19 | Livorsi (2015)           | 2015 |
| 20 | Livorsi (2015)           | 2015 |
| 21 | Livorsi (2015)           | 2015 |
| 22 | Livorsi (2015)           | 2015 |
| 23 | Livorsi (2015)           | 2015 |
| 24 | Livorsi (2015)           | 2015 |
| 25 | Livorsi (2015)           | 2015 |
| 26 | Livorsi (2015)           | 2015 |
| 27 | Livorsi (2015)           | 2015 |
| 28 | Livorsi (2015)           | 2015 |
| 29 | Livorsi (2015)           | 2015 |
| 30 | Livorsi (2015)           | 2015 |
| 31 | Livorsi (2015)           | 2015 |
| 32 | Livorsi (2015)           | 2015 |
| 33 | Livorsi (2015)           | 2015 |
| 34 | Livorsi (2015)           | 2015 |
| 35 | Livorsi (2015)           | 2015 |
| 36 | Livorsi (2015)           | 2015 |
| 37 | Lupion-Mendoza (2015)    | 2015 |
| 38 | Lupion-Mendoza (2015)    | 2015 |
| 39 | Lupion-Mendoza (2015)    | 2015 |
| 40 | Lupion-Mendoza (2015)    | 2015 |
| 41 | Lupion-Mendoza (2015)    | 2015 |
| 42 | Lupion-Mendoza (2015)    | 2015 |
| 44 | Lupion-Mendoza (2015)    | 2015 |
| 45 | Lupion-Mendoza (2015)    | 2015 |
| 46 | Lupion-Mendoza (2015)    | 2015 |
| 47 | Lupion-Mendoza (2015)    | 2015 |
| 49 | Lupion-Mendoza (2015)    | 2015 |
| 51 | Lupion-Mendoza (2015)    | 2015 |
| 52 | Lupion-Mendoza (2015)    | 2015 |
| 53 | Lupion-Mendoza (2015)    | 2015 |
| 55 | Lupion-Mendoza (2015)    | 2015 |
| 56 | Lupion-Mendoza (2015)    | 2015 |
| 60 | Masse (2013)             | 2013 |
| 61 | Mehrotra (2013)          | 2013 |
| 62 | Mehrotra (2013)          | 2013 |
| 63 | Mehrotra (2013)          | 2013 |
| 64 | Mehrotra (2013)          | 2013 |
| 65 | Mehrotra (2013)          | 2013 |
| 66 | Mehrotra (2013)          | 2013 |
| 67 | Mehrotra (2013)          | 2013 |
| 68 | Mehrotra (2013)          | 2013 |
| 70 | Mehrotra (2013)          | 2013 |
| 72 | Mehrotra (2013)          | 2013 |
| 73 | Mehrotra (2013)          | 2013 |
| 74 | Mehrotra (2013)          | 2013 |
| 75 | Mehrotra (2013)          | 2013 |
| 78 | Mehrotra (2013)          | 2013 |
| 79 | Mehrotra (2013)          | 2013 |
| 80 | Mehrotra (2013)          | 2013 |

All RR data

1  
2  
3  
4  
5  
6  
7  
8  
9  
10  
11  
12  
13  
14  
15  
16  
17  
18  
19  
20  
21  
22  
23  
24  
25  
26  
27  
28  
29  
30  
31  
32  
33  
34  
35  
36  
37  
38  
39  
40  
41  
42  
43  
44  
45  
46  
47  
48  
49  
50  
51  
52  
53  
54  
55  
56  
57  
58  
59  
60

|                    |      |
|--------------------|------|
| 81 Mehrotra (2013) | 2013 |
| 82 Mehrotra (2013) | 2013 |
| 83 Mehrotra (2013) | 2013 |
| 84 Mehrotra (2013) | 2013 |
| 101 Saint (2003)   | 2003 |
| 104 Tran (2016)    | 2016 |
| 105 Tran (2016)    | 2016 |
| 110 Tran (2016)    | 2016 |
| 111 Tran (2016)    | 2016 |
| 112 Tran (2016)    | 2016 |
| 115 Tran (2016)    | 2016 |
| 119 Tran (2016)    | 2016 |
| 121 Tran (2016)    | 2016 |
| 123 Tran (2016)    | 2016 |
| 124 Tran (2016)    | 2016 |
| 125 Tran (2016)    | 2016 |
| 126 Tran (2016)    | 2016 |
| 127 Tran (2016)    | 2016 |
| 128 Tran (2016)    | 2016 |

For peer review only

## All RR data

| Outcome                                                          | Isolated |
|------------------------------------------------------------------|----------|
| All non infectious event                                         | 62       |
| Severe non infectitious event                                    | 20       |
| Infectious event                                                 | 6        |
| HCW help in AOL (very/satisfied)                                 | 24       |
| Readmission/death 30 days                                        | 15       |
| Readmission 30 days                                              | 15       |
| Death 30 days                                                    | 4        |
| The importance of hand hygiene was explained by staff            | 48       |
| The food tray was removed promptly after eating                  | 34       |
| The room atmosphere was sufficiently quiet                       | 70       |
| Blood pressure was recorded at least once daily, every day       | 43       |
| Any falls during present admission                               | 1        |
| Any new pressure ulcers during present admission                 | 2        |
| Any falls or pressure ulcers during present admission            | 3        |
| Received help after pressing call button                         | 17       |
| Top box for all staff responsiveness                             | 3        |
| Before giving new medicine, hospital staff describe side effects | 25       |
| Top box for all medication communication                         | 22       |
| Any complaint                                                    | 42       |
| Informal complaint                                               | 37       |
| Formal complaint                                                 | 12       |
| Any adverse event                                                | 108      |
| Non preventable adverse event                                    | 34       |
| Preventable adverse event                                        | 74       |
| Supportive care failure                                          | 38       |
| Diagnostic error                                                 | 9        |
| Operative error                                                  | 17       |
| Medical procedure error                                          | 13       |
| Drug related error                                               | 26       |
| Falls                                                            | 19       |
| Injury                                                           | 1        |
| IV related event                                                 | 3        |
| Medication related event                                         | 15       |
| Therapy related event                                            | 7        |
| Examined by attending physician                                  | 11       |
| Fall (MRSA)*                                                     | 10.3     |
| Treatment incident (MRSA)*                                       | 0.4      |
| Infection control incident (MRSA)*                               | 1.8      |
| Safety incident (MRSA)*                                          | 0.1      |
| Equipment incident (MRSA)*                                       | 0.5      |
| Medication incident (respiratory)*                               | 2.1      |
| Laboratory incident (respiratory)*                               | 0.9      |
| Infection control incident (respiratory)*                        | 1        |
| Safety incident (respiratory)*                                   | 0.3      |
| Equipment incident (respiratory)*                                | 0.4      |
| Patient complaints (respiratory)*                                | 2.6      |
| 30-day readmission (MRSA)                                        | 140      |
| Preventable non infectiouts event                                | 37       |
| Encounters per hr (no)                                           | 5        |
| ICU encounters per hr                                            | 6        |
| Floor encounters per hr                                          | 4        |
| Global hygiene (very/satisfied)                                  | 28       |
| Daily room cleaning (very/satisfied)                             | 27       |
| HCW availability (very/satisfied)                                | 25       |

|    |  |  |
|----|--|--|
| 1  |  |  |
| 2  |  |  |
| 3  |  |  |
| 4  |  |  |
| 5  |  |  |
| 6  |  |  |
| 7  |  |  |
| 8  |  |  |
| 9  |  |  |
| 10 |  |  |
| 11 |  |  |
| 12 |  |  |
| 13 |  |  |
| 14 |  |  |
| 15 |  |  |
| 16 |  |  |
| 17 |  |  |
| 18 |  |  |
| 19 |  |  |
| 20 |  |  |
| 21 |  |  |
| 22 |  |  |
| 23 |  |  |
| 24 |  |  |
| 25 |  |  |
| 26 |  |  |
| 27 |  |  |
| 28 |  |  |
| 29 |  |  |
| 30 |  |  |
| 31 |  |  |
| 32 |  |  |
| 33 |  |  |
| 34 |  |  |
| 35 |  |  |
| 36 |  |  |
| 37 |  |  |
| 38 |  |  |
| 39 |  |  |
| 40 |  |  |
| 41 |  |  |
| 42 |  |  |
| 43 |  |  |
| 44 |  |  |
| 45 |  |  |
| 46 |  |  |
| 47 |  |  |
| 48 |  |  |
| 49 |  |  |
| 50 |  |  |
| 51 |  |  |
| 52 |  |  |
| 53 |  |  |
| 54 |  |  |
| 55 |  |  |
| 56 |  |  |
| 57 |  |  |
| 58 |  |  |
| 59 |  |  |
| 60 |  |  |

## All RR data

|                                                                                        |    |
|----------------------------------------------------------------------------------------|----|
| Daily HCW presence (very/satisfied)                                                    | 27 |
| Human relation with HCW (very/satisfied)                                               | 27 |
| Global satisfaction (very/satisfied)                                                   | 25 |
| ED visit 30 days                                                                       | 22 |
| Overall rating of hospital =>9/10                                                      | 44 |
| Nurses treat you with courtesy and respect                                             | 51 |
| Nurses listen carefully                                                                | 47 |
| Nurses explain things in an understandable way                                         | 47 |
| Received help after pressing call button                                               | 28 |
| Doctors treat you with courtesy and respect                                            | 53 |
| Doctors listen carefully to you                                                        | 48 |
| Doctors explain things in an understandable way                                        | 50 |
| Room and bathroom kept clean                                                           | 42 |
| Room quiet at night                                                                    | 51 |
| Received help with bathroom/bedpan                                                     | 19 |
| Pain well controlled                                                                   | 34 |
| Hospital staff help with pain                                                          | 45 |
| Hospital staff explain new medications                                                 | 20 |
| Hospital staff describe side effects of medications                                    | 13 |
| Hospital staff discussed help after discharge                                          | 52 |
| Written information on problems to look for after discharge                            | 52 |
| Recommend hospital to friends and family                                               | 43 |
| Overall satisfaction with the professional treatment received from health care workers | 67 |
| Nurses treated the patients in polite and respectful manner (totally/partially agree)  | 70 |
| Physicians treated the patients in polite and respectful manner                        | 71 |
| Nurses provided clear information about the health problem                             | 64 |
| Physicians provided clear information about the health problem                         | 66 |
| Clear explanations were provided before all procedures                                 | 62 |
| Health care workers entered the room whenever the patient called them                  | 66 |
| Blood pressure and temperature recorded at least once a day                            | 65 |
| The physician visited daily                                                            | 69 |
| The room was comfortable                                                               | 62 |
| Room cleaning was satisfactory                                                         | 66 |
| I frequently felt lonely during admission                                              | 17 |
| Medical notes were recorded every day                                                  | 64 |
| Nurses notes were recorded every day                                                   | 64 |
| Daily temperature was recorded at least once a day, every day                          | 53 |
| Daily glycemc levels were recorded as indicated, everyday (only diabetic patients)     | 31 |
| Total number of complications                                                          | 60 |
| Nurses treat with courtesy and respect                                                 | 31 |
| Nurses listen carefully                                                                | 30 |
| Nurses explain things in understandable way                                            | 30 |
| Top box for all nursing communication                                                  | 27 |
| Doctors treat with courtesy and respect                                                | 33 |
| Doctors listen carefully                                                               | 31 |
| Doctors explain things in understandable way                                           | 29 |
| Top box for all doctor communication                                                   | 27 |
| Received help in bathroom/bedpan use                                                   | 25 |
| Pain well controlled                                                                   | 26 |
| Hospital staff help with pain                                                          | 26 |
| Top box for all pain management                                                        | 25 |
| Before giving new medicine, hospital staff tells what it is for                        | 30 |
| Spoken with about having necessary help after discharge                                | 31 |
| Written information on symptoms/problems to look for after discharge                   | 33 |
| Top box for all discharge information                                                  | 30 |



## All RR data

|    |                                                    |      |
|----|----------------------------------------------------|------|
| 1  |                                                    |      |
| 2  |                                                    |      |
| 3  |                                                    |      |
| 4  | Hospital room and bathroom kept clean (individual) | 27   |
| 5  | Area near room quiet at night (individual)         | 24   |
| 6  | Recommend hospital to friends and family (global)  | 25   |
| 7  | Overall hospital rating (global)                   | 22   |
| 8  | Examined by senior resident doctor                 | 26   |
| 9  | Medication incident (MRSA)*                        | 2.2  |
| 10 | Laboratory incident (MRSA)*                        | 0.3  |
| 11 | Any adverse event (MRSA)*                          | 12.4 |
| 12 | Patient complaints (MRSA)*                         | 1.1  |
| 13 | Fall (respiratory)*                                | 4.2  |
| 14 | Treatment incident (respiratory)*                  | 0.6  |
| 15 | Any adverse event (respiratory)*                   | 9.1  |
| 16 | Inpatient mortality (MRSA)                         | 59   |
| 17 | 30-day ED visit (MRSA)                             | 84   |
| 18 | Readmission or ED visit (respiratory)              | 167  |
| 19 | Inpatient mortality (respiratory)                  | 104  |
| 20 | 30-day readmission (respiratory)                   | 206  |
| 21 | 30-day ED visit (respiratory)                      | 164  |
| 22 | Readmission or ED visit (respiratory)              | 261  |
| 23 |                                                    |      |
| 24 |                                                    |      |
| 25 |                                                    |      |
| 26 |                                                    |      |
| 27 |                                                    |      |
| 28 |                                                    |      |
| 29 |                                                    |      |
| 30 |                                                    |      |
| 31 |                                                    |      |
| 32 |                                                    |      |
| 33 |                                                    |      |
| 34 |                                                    |      |
| 35 |                                                    |      |
| 36 |                                                    |      |
| 37 |                                                    |      |
| 38 |                                                    |      |
| 39 |                                                    |      |
| 40 |                                                    |      |
| 41 |                                                    |      |
| 42 |                                                    |      |
| 43 |                                                    |      |
| 44 |                                                    |      |
| 45 |                                                    |      |
| 46 |                                                    |      |
| 47 |                                                    |      |
| 48 |                                                    |      |
| 49 |                                                    |      |
| 50 |                                                    |      |
| 51 |                                                    |      |
| 52 |                                                    |      |
| 53 |                                                    |      |
| 54 |                                                    |      |
| 55 |                                                    |      |
| 56 |                                                    |      |
| 57 |                                                    |      |
| 58 |                                                    |      |
| 59 |                                                    |      |
| 60 |                                                    |      |

## All RR data

|    | Isolated.N | Control | Control.N | RI          | RC          | RR          | inout | Type         |
|----|------------|---------|-----------|-------------|-------------|-------------|-------|--------------|
| 1  |            |         |           |             |             |             |       |              |
| 2  |            |         |           |             |             |             |       |              |
| 3  |            |         |           |             |             |             |       |              |
| 4  | 148        | 84      | 148       | 0.418918919 | 0.567567568 | 0.738095238 | a     | AE           |
| 5  | 148        | 27      | 148       | 0.135135135 | 0.182432432 | 0.740740741 | a     | AE           |
| 6  | 148        | 10      | 148       | 0.040540541 | 0.067567568 | 0.6         | a     | AE           |
| 7  | 30         | 60      | 60        | 0.8         | 1           | 1.25        | a     | Satisfaction |
| 8  | 75         | 70      | 420       | 0.2         | 0.166666667 | 1.2         | a     | AE           |
| 9  | 75         | 66      | 420       | 0.2         | 0.157142857 | 1.272727273 | a     | AE           |
| 10 | 75         | 9       | 420       | 0.053333333 | 0.021428571 | 2.488888889 | a     | AE           |
| 11 | 72         | 18      | 72        | 0.666666667 | 0.25        | 0.375       | a     | Satisfaction |
| 12 | 72         | 63      | 72        | 0.472222222 | 0.875       | 1.852941177 | a     | Satisfaction |
| 13 | 72         | 54      | 72        | 0.972222222 | 0.75        | 0.771428572 | a     | Satisfaction |
| 14 | 72         | 61      | 72        | 0.597222222 | 0.847222222 | 0.704918033 | a     | Quality      |
| 15 | 72         | 0       | 72        | 0.013888889 | 0           | #DIV/0!     | a     | AE           |
| 16 | 72         | 0       | 72        | 0.027777778 | 0           | #DIV/0!     | a     | AE           |
| 17 | 72         | 0       | 72        | 0.041666667 | 0           | #DIV/0!     | a     | AE           |
| 18 | 37         | 33      | 51        | 0.459459459 | 0.647058824 | 1.408304501 | a     | Quality      |
| 19 | 37         | 14      | 51        | 0.081081081 | 0.274509804 | 3.385620919 | a     | Satisfaction |
| 20 | 37         | 20      | 51        | 0.675675676 | 0.392156863 | 0.580392157 | a     | Quality      |
| 21 | 37         | 20      | 51        | 0.594594595 | 0.392156863 | 0.659536542 | a     | Quality      |
| 22 | 150        | 13      | 300       | 0.28        | 0.043333333 | 6.461538462 | a     | Satisfaction |
| 23 | 150        | 10      | 300       | 0.246666667 | 0.033333333 | 7.4         | a     | Satisfaction |
| 24 | 150        | 3       | 300       | 0.08        | 0.01        | 8           | a     | Satisfaction |
| 25 | 150        | 53      | 300       | 0.72        | 0.176666667 | 4.075471698 | a     | Satisfaction |
| 26 | 150        | 39      | 300       | 0.226666667 | 0.13        | 1.743589744 | a     | AE           |
| 27 | 150        | 14      | 300       | 0.493333333 | 0.046666667 | 10.57142857 | a     | AE           |
| 28 | 150        | 5       | 300       | 0.253333333 | 0.016666667 | 15.2        | a     | AE           |
| 29 | 150        | 2       | 300       | 0.06        | 0.006666667 | 9           | a     | AE           |
| 30 | 150        | 20      | 300       | 0.113333333 | 0.066666667 | 1.7         | a     | AE           |
| 31 | 150        | 7       | 300       | 0.086666667 | 0.023333333 | 3.714285714 | a     | AE           |
| 32 | 150        | 19      | 300       | 0.173333333 | 0.063333333 | 2.736842105 | a     | AE           |
| 33 | 45         | 85      | 256       | 0.422222222 | 0.33203125  | 1.271633987 | a     | AE           |
| 34 | 45         | 19      | 256       | 0.022222222 | 0.07421875  | 0.299415205 | a     | AE           |
| 35 | 45         | 6       | 256       | 0.066666667 | 0.0234375   | 2.844444444 | a     | AE           |
| 36 | 45         | 122     | 256       | 0.333333333 | 0.4765625   | 0.699453552 | a     | AE           |
| 37 | 45         | 24      | 256       | 0.155555556 | 0.09375     | 1.659259259 | a     | AE           |
| 38 | 31         | 79      | 108       | 0.35483871  | 0.731481481 | 2.061447808 | a     | Quality      |
| 39 | 100        | 8       | 100       | 0.103       | 0.08        | 1.2875      | a     | AE           |
| 40 | 100        | 0.5     | 100       | 0.004       | 0.005       | 0.8         | a     | AE           |
| 41 | 100        | 0.1     | 100       | 0.018       | 0.0011      | 16.36363636 | a     | AE           |
| 42 | 100        | 0.3     | 100       | 0.001       | 0.003       | 0.333333333 | a     | AE           |
| 43 | 100        | 0.2     | 100       | 0.005       | 0.002       | 2.5         | a     | AE           |
| 44 | 100        | 1.6     | 100       | 0.021       | 0.016       | 1.3125      | a     | AE           |
| 45 | 100        | 0.6     | 100       | 0.009       | 0.006       | 1.5         | a     | AE           |
| 46 | 100        | 0.6     | 100       | 0.01        | 0.006       | 1.666666667 | a     | AE           |
| 47 | 100        | 0.1     | 100       | 0.003       | 0.001       | 3           | a     | AE           |
| 48 | 100        | 0.2     | 100       | 0.004       | 0.002       | 2           | a     | AE           |
| 49 | 100        | 1       | 100       | 0.026       | 0.01        | 2.6         | a     | Satisfaction |
| 50 | 737        | 108     | 737       | 0.19        | 0.147       | 1.292517007 | a     | AE           |
| 51 | 148        | 41      | 148       | 0.25        | 0.277027027 | 0.902439024 | b     | AE           |
| 52 | 485        | 11      | 1002      | 0.010309278 | 0.010978044 | 1.064870304 | b     | Quality      |
| 53 | 319        | 14      | 658       | 0.018808777 | 0.021276596 | 1.131205713 | b     | Quality      |
| 54 | 166        | 8       | 344       | 0.024096386 | 0.023255814 | 0.965116263 | b     | Quality      |
| 55 | 30         | 59      | 60        | 0.933333333 | 0.983333333 | 1.053571429 | b     | Satisfaction |
| 56 | 30         | 58      | 60        | 0.9         | 0.966666667 | 1.074074074 | b     | Satisfaction |
| 57 | 30         | 57      | 60        | 0.833333333 | 0.95        | 1.14        | b     | Satisfaction |
| 58 |            |         |           |             |             |             |       |              |
| 59 |            |         |           |             |             |             |       |              |

All RR data

|    |     |     |     |             |             |             |   |              |  |  |  |
|----|-----|-----|-----|-------------|-------------|-------------|---|--------------|--|--|--|
| 1  |     |     |     |             |             |             |   |              |  |  |  |
| 2  |     |     |     |             |             |             |   |              |  |  |  |
| 3  |     |     |     |             |             |             |   |              |  |  |  |
| 4  | 30  | 59  | 60  | 0.9         | 0.983333333 | 1.092592592 | b | Satisfaction |  |  |  |
| 5  | 30  | 60  | 60  | 0.9         | 1           | 1.111111111 | b | Satisfaction |  |  |  |
| 6  | 30  | 60  | 60  | 0.833333333 | 1           | 1.2         | b | Satisfaction |  |  |  |
| 7  | 75  | 109 | 420 | 0.293333333 | 0.25952381  | 1.130275229 | b | AE           |  |  |  |
| 8  | 68  | 85  | 135 | 0.647058824 | 0.62962963  | 0.973063973 | b | Satisfaction |  |  |  |
| 9  | 69  | 110 | 138 | 0.739130435 | 0.797101449 | 1.078431372 | b | Satisfaction |  |  |  |
| 10 | 70  | 101 | 137 | 0.671428571 | 0.737226277 | 1.097996583 | b | Satisfaction |  |  |  |
| 11 | 69  | 102 | 135 | 0.68115942  | 0.755555556 | 1.109219859 | b | Satisfaction |  |  |  |
| 12 | 52  | 70  | 114 | 0.538461538 | 0.614035088 | 1.140350879 | b | Satisfaction |  |  |  |
| 13 | 70  | 106 | 137 | 0.757142857 | 0.773722628 | 1.021897811 | b | Satisfaction |  |  |  |
| 14 | 68  | 103 | 136 | 0.705882353 | 0.757352941 | 1.072916666 | b | Satisfaction |  |  |  |
| 15 | 68  | 99  | 137 | 0.735294118 | 0.722627737 | 0.982773722 | b | Satisfaction |  |  |  |
| 16 | 68  | 82  | 127 | 0.617647059 | 0.645669291 | 1.045369328 | b | Satisfaction |  |  |  |
| 17 | 70  | 98  | 137 | 0.728571429 | 0.715328467 | 0.981823386 | b | Satisfaction |  |  |  |
| 18 | 30  | 49  | 68  | 0.633333333 | 0.720588235 | 1.137770898 | b | Satisfaction |  |  |  |
| 19 | 62  | 75  | 117 | 0.548387097 | 0.641025641 | 1.16892911  | b | Satisfaction |  |  |  |
| 20 | 62  | 96  | 115 | 0.725806452 | 0.834782609 | 1.150144927 | b | Satisfaction |  |  |  |
| 21 | 27  | 47  | 59  | 0.740740741 | 0.796610169 | 1.075423728 | b | Satisfaction |  |  |  |
| 22 | 25  | 35  | 57  | 0.52        | 0.614035088 | 1.180836708 | b | Satisfaction |  |  |  |
| 23 | 61  | 108 | 124 | 0.852459016 | 0.870967742 | 1.021712159 | b | Satisfaction |  |  |  |
| 24 | 62  | 106 | 120 | 0.838709677 | 0.883333333 | 1.053205128 | b | Satisfaction |  |  |  |
| 25 | 67  | 98  | 133 | 0.641791045 | 0.736842105 | 1.148102814 | b | Satisfaction |  |  |  |
| 26 | 72  | 69  | 72  | 0.930555556 | 0.958333333 | 1.029850745 | b | Satisfaction |  |  |  |
| 27 | 72  | 71  | 72  | 0.972222222 | 0.986111111 | 1.014285714 | b | Satisfaction |  |  |  |
| 28 | 72  | 72  | 72  | 0.986111111 | 1           | 1.014084507 | b | Satisfaction |  |  |  |
| 29 | 72  | 68  | 72  | 0.888888889 | 0.944444444 | 1.062499999 | b | Satisfaction |  |  |  |
| 30 | 72  | 62  | 72  | 0.916666667 | 0.861111111 | 0.939393939 | b | Satisfaction |  |  |  |
| 31 | 72  | 66  | 72  | 0.861111111 | 0.916666667 | 1.06451613  | b | Satisfaction |  |  |  |
| 32 | 72  | 71  | 72  | 0.916666667 | 0.986111111 | 1.075757575 | b | Satisfaction |  |  |  |
| 33 | 72  | 70  | 72  | 0.902777778 | 0.972222222 | 1.076923076 | b | Quality      |  |  |  |
| 34 | 72  | 71  | 72  | 0.958333333 | 0.986111111 | 1.028985507 | b | Quality      |  |  |  |
| 35 | 72  | 67  | 72  | 0.861111111 | 0.930555556 | 1.080645162 | b | Satisfaction |  |  |  |
| 36 | 72  | 70  | 72  | 0.916666667 | 0.972222222 | 1.06060606  | b | Quality      |  |  |  |
| 37 | 72  | 17  | 72  | 0.236111111 | 0.236111111 | 1           | b | Satisfaction |  |  |  |
| 38 | 72  | 65  | 72  | 0.888888889 | 0.902777778 | 1.015625    | b | Quality      |  |  |  |
| 39 | 72  | 69  | 72  | 0.888888889 | 0.958333333 | 1.078124999 | b | Quality      |  |  |  |
| 40 | 72  | 60  | 72  | 0.736111111 | 0.833333333 | 1.132075471 | b | Quality      |  |  |  |
| 41 | 31  | 18  | 18  | 1           | 1           | 1           | b | Quality      |  |  |  |
| 42 | 111 | 62  | 111 | 0.540540541 | 0.558558559 | 0.967741935 | b | Satisfaction |  |  |  |
| 43 | 37  | 45  | 51  | 0.837837838 | 0.882352941 | 1.053130929 | b | Satisfaction |  |  |  |
| 44 | 37  | 43  | 51  | 0.810810811 | 0.843137255 | 1.039869281 | b | Satisfaction |  |  |  |
| 45 | 37  | 42  | 51  | 0.810810811 | 0.823529412 | 1.015686275 | b | Satisfaction |  |  |  |
| 46 | 37  | 39  | 51  | 0.72972973  | 0.764705882 | 1.047930282 | b | Satisfaction |  |  |  |
| 47 | 37  | 42  | 51  | 0.891891892 | 0.823529412 | 0.923351159 | b | Satisfaction |  |  |  |
| 48 | 37  | 42  | 51  | 0.837837838 | 0.823529412 | 0.982922201 | b | Satisfaction |  |  |  |
| 49 | 37  | 44  | 51  | 0.783783784 | 0.862745098 | 1.100743745 | b | Satisfaction |  |  |  |
| 50 | 37  | 37  | 51  | 0.72972973  | 0.725490196 | 0.994190268 | b | Satisfaction |  |  |  |
| 51 | 37  | 35  | 51  | 0.675675676 | 0.68627451  | 1.015686274 | b | Quality      |  |  |  |
| 52 | 37  | 40  | 51  | 0.702702703 | 0.784313725 | 1.116138762 | b | Quality      |  |  |  |
| 53 | 37  | 38  | 51  | 0.702702703 | 0.745098039 | 1.060331824 | b | Quality      |  |  |  |
| 54 | 37  | 35  | 51  | 0.675675676 | 0.68627451  | 1.015686274 | b | Quality      |  |  |  |
| 55 | 37  | 41  | 51  | 0.810810811 | 0.803921569 | 0.991503268 | b | Quality      |  |  |  |
| 56 | 37  | 45  | 51  | 0.837837838 | 0.882352941 | 1.053130929 | b | Quality      |  |  |  |
| 57 | 37  | 49  | 51  | 0.891891892 | 0.960784314 | 1.077243019 | b | Quality      |  |  |  |
| 58 | 37  | 45  | 51  | 0.810810811 | 0.882352941 | 1.088235294 | b | Quality      |  |  |  |
| 59 |     |     |     |             |             |             |   |              |  |  |  |
| 60 |     |     |     |             |             |             |   |              |  |  |  |

1  
2  
3  
4  
5  
6  
7  
8  
9  
10  
11  
12  
13  
14  
15  
16  
17  
18  
19  
20  
21  
22  
23  
24  
25  
26  
27  
28  
29  
30  
31  
32  
33  
34  
35  
36  
37  
38  
39  
40  
41  
42  
43  
44  
45  
46  
47  
48  
49  
50  
51  
52  
53  
54  
55  
56  
57  
58  
59  
60

## All RR data

|      |      |      |             |             |             |   |              |
|------|------|------|-------------|-------------|-------------|---|--------------|
| 37   | 37   | 51   | 0.72972973  | 0.725490196 | 0.994190268 | b | Quality      |
| 37   | 32   | 51   | 0.648648649 | 0.62745098  | 0.96732026  | b | Satisfaction |
| 37   | 41   | 51   | 0.675675676 | 0.803921569 | 1.189803922 | b | Satisfaction |
| 37   | 36   | 51   | 0.594594595 | 0.705882353 | 1.187165775 | b | Satisfaction |
| 31   | 94   | 108  | 0.838709677 | 0.87037037  | 1.037749288 | b | Quality      |
| 100  | 2.4  | 100  | 0.022       | 0.024       | 0.916666667 | b | AE           |
| 100  | 0.3  | 100  | 0.0027      | 0.0033      | 0.818181818 | b | AE           |
| 100  | 10.7 | 100  | 0.124       | 0.107       | 1.158878505 | b | AE           |
| 100  | 1.3  | 100  | 0.0109      | 0.0125      | 0.872       | b | Satisfaction |
| 100  | 5.1  | 100  | 0.042       | 0.051       | 0.823529412 | b | AE           |
| 100  | 0.7  | 100  | 0.006       | 0.007       | 0.857142857 | b | AE           |
| 100  | 8.9  | 100  | 0.091       | 0.089       | 1.02247191  | b | AE           |
| 737  | 52   | 737  | 0.08        | 0.07        | 1.142857143 | b | AE           |
| 737  | 86   | 737  | 0.114       | 0.117       | 0.974358974 | b | AE           |
| 737  | 142  | 737  | 0.227       | 0.193       | 1.176165803 | b | AE           |
| 1502 | 128  | 1502 | 0.069       | 0.085       | 0.811764706 | b | AE           |
| 1502 | 236  | 1502 | 0.137       | 0.157       | 0.872611465 | b | AE           |
| 1502 | 168  | 1502 | 0.109       | 0.112       | 0.973214286 | b | AE           |
| 1502 | 278  | 1502 | 0.174       | 0.185       | 0.940540541 | b | AE           |

## All RR data

|    | Good/bad | exp yi | yi    | vi           |             |
|----|----------|--------|-------|--------------|-------------|
| 1  |          |        |       |              |             |
| 2  |          |        |       |              |             |
| 3  |          |        |       |              |             |
| 4  | Good/bad | exp yi | yi    | vi           |             |
| 5  | Bad      |        | 0.74  | -0.303682414 | 0.014520281 |
| 6  | Bad      |        | 0.74  | -0.300104592 | 0.073523524 |
| 7  | Bad      |        | 0.60  | -0.510825624 | 0.253153153 |
| 8  | Good     |        | 0.80  | -0.227083588 | 0.008693745 |
| 9  | Bad      |        | 1.20  | 0.182321557  | 0.065238095 |
| 10 | Bad      |        | 1.27  | 0.241162057  | 0.066103896 |
| 11 | Bad      |        | 2.49  | 0.911836382  | 0.345396825 |
| 12 | Good     |        | 2.67  | 0.980829253  | 0.048611111 |
| 13 | Good     |        | 0.54  | -0.616774202 | 0.017507003 |
| 14 | Good     |        | 1.30  | 0.259511195  | 0.005026455 |
| 15 | Good     |        | 0.70  | -0.349673748 | 0.011871479 |
| 16 | Bad      |        | 3.00  | 1.098612289  | 2.639269406 |
| 17 | Bad      |        | 5.00  | 1.609437912  | 2.37260274  |
| 18 | Bad      |        | 7.00  | 1.945910149  | 2.258317025 |
| 19 | Good     |        | 0.71  | -0.342386497 | 0.04249169  |
| 20 | Good     |        | 0.30  | -1.219537321 | 0.358127035 |
| 21 | Good     |        | 1.72  | 0.544051271  | 0.04336513  |
| 22 | Good     |        | 1.52  | 0.4162179    | 0.048819675 |
| 23 | Bad      |        | 6.46  | 1.865867441  | 0.090732601 |
| 24 | Bad      |        | 7.40  | 2.00148      | 0.117027027 |
| 25 | Bad      |        | 8.00  | 2.079441542  | 0.406666667 |
| 26 | Bad      |        | 4.08  | 1.404986494  | 0.018127184 |
| 27 | Bad      |        | 1.74  | 0.555946059  | 0.04505279  |
| 28 | Bad      |        | 10.57 | 2.358154944  | 0.074942085 |
| 29 | Bad      |        | 15.20 | 2.721295428  | 0.216315789 |
| 30 | Bad      |        | 9.00  | 2.197224577  | 0.601111111 |
| 31 | Bad      |        | 1.70  | 0.530628251  | 0.098823529 |
| 32 | Bad      |        | 3.71  | 1.312186389  | 0.20978022  |
| 33 | Bad      |        | 2.74  | 1.006804739  | 0.081093117 |
| 34 | Bad      |        | 1.27  | 0.240302677  | 0.038267813 |
| 35 | Bad      |        | 0.30  | -1.205924024 | 1.026503107 |
| 36 | Bad      |        | 2.84  | 1.045367774  | 0.473871528 |
| 37 | Bad      |        | 0.70  | -0.357455889 | 0.048734916 |
| 38 | Bad      |        | 1.66  | 0.506371273  | 0.158395337 |
| 39 | Good     |        | 0.49  | -0.723408557 | 0.062049995 |
| 40 | Bad      |        | 1.29  | 0.252702354  | 0.202087379 |
| 41 | Bad      |        | 0.80  | -0.223143551 | 4.48        |
| 42 | Bad      |        | 18.00 | 2.890371758  | 10.53555556 |
| 43 | Bad      |        | 0.33  | -1.098612289 | 13.31333333 |
| 44 | Bad      |        | 2.50  | 0.916290732  | 6.98        |
| 45 | Bad      |        | 1.31  | 0.271933715  | 1.081190476 |
| 46 | Bad      |        | 1.50  | 0.405465108  | 2.757777778 |
| 47 | Bad      |        | 1.67  | 0.510825624  | 2.646666667 |
| 48 | Bad      |        | 3.00  | 1.098612289  | 13.31333333 |
| 49 | Bad      |        | 2.00  | 0.693147181  | 7.48        |
| 50 | Bad      |        | 2.60  | 0.955511445  | 1.364615385 |
| 51 | Bad      |        | 1.30  | 0.259511195  | 0.013688412 |
| 52 | Bad      |        | 0.90  | -0.102654154 | 0.037903757 |
| 53 | Good     |        | 0.94  | -0.06285297  | 0.287849231 |
| 54 | Good     |        | 0.88  | -0.123284032 | 0.233440685 |
| 55 | Good     |        | 1.04  | 0.035506688  | 0.366068927 |
| 56 | Good     |        | 0.95  | -0.052185753 | 0.002663438 |
| 57 | Good     |        | 0.93  | -0.071458964 | 0.004278416 |
| 58 | Good     |        | 0.88  | -0.131028262 | 0.00754386  |
| 59 | Good     |        |       |              |             |
| 60 |          |        |       |              |             |

1  
2  
3  
4  
5  
6  
7  
8  
9  
10  
11  
12  
13  
14  
15  
16  
17  
18  
19  
20  
21  
22  
23  
24  
25  
26  
27  
28  
29  
30  
31  
32  
33  
34  
35  
36  
37  
38  
39  
40  
41  
42  
43  
44  
45  
46  
47  
48  
49  
50  
51  
52  
53  
54  
55  
56  
57  
58  
59  
60

## All RR data

|      |      |              |             |
|------|------|--------------|-------------|
| Good | 0.92 | -0.088553397 | 0.00398619  |
| Good | 0.89 | -0.111570701 | 0.004241055 |
| Good | 0.83 | -0.187078253 | 0.007093105 |
| Bad  | 1.13 | 0.122461169  | 0.038914572 |
| Good | 1.03 | 0.027305451  | 0.012378689 |
| Good | 0.93 | -0.075507553 | 0.006959622 |
| Good | 0.91 | -0.093487231 | 0.009592601 |
| Good | 0.90 | -0.103656938 | 0.009180356 |
| Good | 0.88 | -0.131336002 | 0.021997301 |
| Good | 0.98 | -0.021661497 | 0.006716902 |
| Good | 0.93 | -0.070380797 | 0.008483248 |
| Good | 1.02 | 0.017376376  | 0.008095858 |
| Good | 0.96 | -0.044370248 | 0.013424748 |
| Good | 1.02 | 0.018343838  | 0.00822694  |
| Good | 0.88 | -0.129070995 | 0.025000527 |
| Good | 0.86 | -0.156088039 | 0.018069057 |
| Good | 0.87 | -0.139887958 | 0.007814204 |
| Good | 0.93 | -0.07271475  | 0.017290406 |
| Good | 0.85 | -0.166223261 | 0.047950646 |
| Good | 0.98 | -0.021479807 | 0.00403207  |
| Good | 0.95 | -0.051838018 | 0.004202366 |
| Good | 0.87 | -0.138110854 | 0.011015725 |
| Good | 0.97 | -0.029413885 | 0.001640349 |
| Good | 0.99 | -0.014184635 | 0.000592444 |
| Good | 0.99 | -0.013889112 | 0.000381857 |
| Good | 0.94 | -0.060624622 | 0.002553105 |
| Good | 1.06 | 0.062520357  | 0.00350277  |
| Good | 0.94 | -0.062520357 | 0.00350277  |
| Good | 0.93 | -0.073025135 | 0.001458244 |
| Good | 0.93 | -0.074107972 | 0.001892552 |
| Good | 0.97 | -0.028573372 | 0.000799483 |
| Good | 0.93 | -0.077558234 | 0.003276628 |
| Good | 0.94 | -0.0588405   | 0.001659452 |
| Bad  | 1.00 | 0            | 0.089869281 |
| Good | 0.98 | -0.015504187 | 0.003231838 |
| Good | 0.93 | -0.075223421 | 0.002339976 |
| Good | 0.88 | -0.124052649 | 0.007756813 |
| Good | 1.01 | 0.01091989   | 0.001918507 |
| Bad  | 0.97 | -0.032789823 | 0.014777681 |
| Good | 0.95 | -0.051767565 | 0.007845417 |
| Good | 0.96 | -0.039095014 | 0.009954277 |
| Good | 0.98 | -0.015564517 | 0.010507987 |
| Good | 0.95 | -0.04681706  | 0.016043193 |
| Good | 1.08 | 0.079745663  | 0.007477684 |
| Good | 1.02 | 0.017225306  | 0.009432718 |
| Good | 0.91 | -0.095986084 | 0.010575161 |
| Good | 1.01 | 0.005826673  | 0.017429194 |
| Good | 0.98 | -0.015564517 | 0.021936558 |
| Good | 0.90 | -0.109875196 | 0.016826668 |
| Good | 0.94 | -0.058581902 | 0.018142458 |
| Good | 0.98 | -0.015564517 | 0.021936558 |
| Good | 1.01 | 0.008533035  | 0.011088707 |
| Good | 0.95 | -0.051767565 | 0.007845417 |
| Good | 0.93 | -0.074405017 | 0.004076323 |
| Good | 0.92 | -0.084557388 | 0.008920685 |

## All RR data

|    |      |      |              |             |
|----|------|------|--------------|-------------|
| 3  | Good | 1.01 | 0.005826673  | 0.017429194 |
| 4  | Good | 1.03 | 0.033225648  | 0.026281797 |
| 5  | Good | 0.84 | -0.173788522 | 0.017755374 |
| 6  | Good | 0.84 | -0.171568765 | 0.026597453 |
| 7  | Good | 0.96 | -0.037054222 | 0.007582513 |
| 8  | Bad  | 0.92 | -0.087011377 | 0.851212121 |
| 9  | Bad  | 1.00 | 0            | 6.646666667 |
| 10 | Bad  | 1.16 | 0.147452731  | 0.154103105 |
| 11 | Bad  | 0.85 | -0.167054085 | 1.658321678 |
| 12 | Bad  | 0.82 | -0.194156014 | 0.414173669 |
| 13 | Bad  | 0.86 | -0.15415068  | 3.075238095 |
| 14 | Bad  | 1.02 | 0.022223137  | 0.20224966  |
| 15 | Bad  | 1.13 | 0.126293725  | 0.033466218 |
| 16 | Bad  | 0.98 | -0.023530497 | 0.020818965 |
| 17 | Bad  | 1.18 | 0.162166755  | 0.010316573 |
| 18 | Bad  | 0.81 | -0.207639365 | 0.016096327 |
| 19 | Bad  | 0.87 | -0.135955636 | 0.007760099 |
| 20 | Bad  | 0.98 | -0.024097552 | 0.010718384 |
| 21 | Bad  | 0.94 | -0.063100706 | 0.006096982 |

1  
2  
3  
4  
5  
6  
7  
8  
9  
10  
11  
12  
13  
14  
15  
16  
17  
18  
19  
20  
21  
22  
23  
24  
25  
26  
27  
28  
29  
30  
31  
32  
33  
34  
35  
36  
37  
38  
39  
40  
41  
42  
43  
44  
45  
46  
47  
48  
49  
50  
51  
52  
53  
54  
55  
56  
57  
58  
59  
60

| Reference      | Year | Outcome     | Isolated | IsolatedSD | Isolated.N | Control | ControlSD |
|----------------|------|-------------|----------|------------|------------|---------|-----------|
| 2 Kennedy (1   | 1997 | Anxiety     | 37.8     | 19.9       | 16         | 12.3    | 10.7      |
| 9 Gammon ('    | 1998 | Anxiety     | 12.75    | 2.43       | 20         | 8.15    | 3.17      |
| 15 Tarzi (2001 | 2001 | Anxiety     | 15       | 3          | 22         | 8.6     | 3         |
| 16 Day (2011a  | 2011 | Anxiety/Dep | 14.35    | 1.61       | 20         | 13      | 0.8       |
| 13 Findink (20 | 2012 | Anxiety     | 7.23     | 4.1        | 61         | 6.42    | 3.9       |
| Soon (2013     | 2013 | Anxiety     |          |            |            |         |           |
| 17 Lupion-Mer  | 2015 | Anxiety     | 8.2      | 0.48       | 72         | 6.9     | 0.41      |
| 8 Lau (2016)   | 2016 | Anxiety     | 1.48     | 1.72       | 75         | 1.7     | 1.8       |

For peer review only



| Control.N | yi      | vi     |
|-----------|---------|--------|
| 16        | 1.5558  | 0.1628 |
| 20        | 1.5963  | 0.1319 |
| 20        | 2.093   | 0.1476 |
| 83        | 1.3351  | 0.0707 |
| 57        | 0.201   | 0.0341 |
|           | 2.5649  | 0.986  |
| 72        | 2.8969  | 0.0569 |
| 421       | -0.1228 | 0.0157 |

For peer review only

| Reference      | Year | Outcome    | Isolated | IsolatedSD | Isolated.N | Control | ControlSD |
|----------------|------|------------|----------|------------|------------|---------|-----------|
| 1 Kennedy (1   | 1997 | Depression | 16.5     | 9.9        | 16         | 12.3    | 10.7      |
| 10 Gammon (    | 1998 | Depression | 12.45    | 2.21       | 20         | 7.3     | 2.05      |
| Tarzi (200     | 2001 | Depression |          |            |            |         |           |
| 16 Day (2011   | 2011 | Anxiety/De | 14.3     | 1.61       | 20         | 13      | 0.8       |
| 14 Findink (20 | 2012 | Depression | 8.83     | 4.7        | 61         | 7.89    | 4.9       |
| Soon (2013     | 2013 | Depression |          |            |            |         |           |
| 18 Lupion-Mer  | 2015 | Depression | 7.8      | 0.51       | 72         | 6.6     | 0.43      |
| 7 Lau (2016)   | 2016 | Depression | 6.89     | 4.92       | 75         | 7.35    | 5.92      |

For peer review only

| Control.N | yi     | vi    |
|-----------|--------|-------|
| 16        | 0.397  | 0.127 |
| 20        | 2.368  | 0.17  |
|           | 2.101  | 0.125 |
| 83        | 1.335  | 0.071 |
| 57        | 0.195  | 0.034 |
|           | 1.562  | 0.2   |
| 72        | 2.531  | 0.05  |
| 420       | -0.079 | 0.016 |

For peer review only

1  
2  
3  
4  
5  
6  
7  
8  
9  
10  
11  
12  
13  
14  
15  
16  
17  
18  
19  
20  
21  
22  
23  
24  
25  
26  
27  
28  
29  
30  
31  
32  
33  
34  
35  
36  
37  
38  
39  
40  
41  
42  
43  
44  
45  
46  
47  
48  
49  
50  
51  
52  
53  
54  
55  
56  
57  
58  
59  
60

**Case-control studies**

|                                                                                                                                                                                                                                                                          | Colorado (2014)                      | Kennedy (1997)                                                                                                | Livorsi (2015)                                                        | Lupion (2015)                                                         | Masse (2013)                     | Soon (2013)                                | Tarzi (2001)                                                                                          |
|--------------------------------------------------------------------------------------------------------------------------------------------------------------------------------------------------------------------------------------------------------------------------|--------------------------------------|---------------------------------------------------------------------------------------------------------------|-----------------------------------------------------------------------|-----------------------------------------------------------------------|----------------------------------|--------------------------------------------|-------------------------------------------------------------------------------------------------------|
| 1) <u>Is the case definition adequate?</u><br>a) yes, with independent validation *<br>b) yes, eg record linkage or based on self reports<br>c) no description                                                                                                           | *                                    | *                                                                                                             | *                                                                     | *                                                                     | *                                | *                                          | *                                                                                                     |
| 2) <u>Representativeness of the cases</u><br>a) consecutive or obviously representative series of cases *<br>b) potential for selection biases or not stated                                                                                                             | b                                    | b                                                                                                             | *                                                                     | b                                                                     | b                                | *                                          | *                                                                                                     |
| 3) <u>Selection of Controls</u><br>a) community controls (studies of hospital patients) *<br>b) hospital controls<br>c) no description                                                                                                                                   | *                                    | *                                                                                                             | *                                                                     | *                                                                     | *                                | *                                          | *                                                                                                     |
| 4) <u>Definition of Controls</u><br>a) no history of disease (endpoint) *<br>b) no description of source                                                                                                                                                                 | *                                    |                                                                                                               |                                                                       | *                                                                     |                                  |                                            |                                                                                                       |
| <b>Comparability</b>                                                                                                                                                                                                                                                     |                                      |                                                                                                               |                                                                       |                                                                       |                                  |                                            |                                                                                                       |
| 1) <u>Comparability of cases and controls on the basis of the design or analysis</u><br>a) study controls for diagnosis *<br>b) study controls for any additional factor *                                                                                               | *<br>* (l)                           | *<br>* (l, g)                                                                                                 |                                                                       | *<br>* (g)                                                            | *<br>* (g)                       | *<br>* (l, g)                              | *<br>* (l, g)                                                                                         |
| <b>Outcome</b>                                                                                                                                                                                                                                                           |                                      |                                                                                                               |                                                                       |                                                                       |                                  |                                            |                                                                                                       |
| 1) <u>Ascertainment of exposure</u><br>a) secure record (eg surgical records) *<br>b) structured interview where blind to case/control status *<br>c) interview not blinded to case/control status<br>d) written self report or medical record only<br>e) no description | *                                    | *                                                                                                             | *                                                                     | *                                                                     | *                                | *                                          | *                                                                                                     |
| 2) <u>Same method of ascertainment for cases and controls</u><br>a) yes *<br>b) no                                                                                                                                                                                       | Functional Independence Measure ## * | Functional Independence Measure; Beck Inventory Depression; State Anxiety Inventory; Profile Mood States ## * | Hospital Consumer Assessment of Healthcare Providers and Systems ## * | Hospital Consumer Assessment of Healthcare Providers and Systems ## * | Charlston Comorbidity Index ## * | Hospital Anxiety and Depression Scale ## * | Geriatric Depression Scale; Profile of Mood States; Abbreviated Mental Test Score; Barthel Index ## * |
| 3) <u>Non-Response rate</u><br>a) same rate for both groups *<br>b) non respondents described<br>c) rate different and no designation                                                                                                                                    | *                                    | *                                                                                                             | *                                                                     | *                                                                     |                                  |                                            | *                                                                                                     |

**Cohort studies (1)**

| Selection                                                                                                                                                                                                                                                                                                                      | Croft (2015)                 | Day (2011) a                               | Day (2011) b    | Day (2012)                       | Day (2013)                                  | Evans (2003)                   | Findink (2012)                             | Guilley (2017)                     |
|--------------------------------------------------------------------------------------------------------------------------------------------------------------------------------------------------------------------------------------------------------------------------------------------------------------------------------|------------------------------|--------------------------------------------|-----------------|----------------------------------|---------------------------------------------|--------------------------------|--------------------------------------------|------------------------------------|
| 1) <u>Representativeness of the exposed cohort</u><br>a) truly representative of the average patient in the community *<br>b) somewhat representative of the average patient in the community *<br>c) selected group of users eg nurses, volunteers<br>d) no description of the derivation of the cohort                       | *                            | *                                          | *               | *                                | * b                                         | c                              | *b                                         | *b                                 |
| 2) <u>Selection of the non exposed cohort</u><br>a) drawn from the same community as the exposed cohort *<br>b) drawn from a different source<br>c) no description of the derivation of the non exposed cohort                                                                                                                 | *                            | *                                          | *               | *                                | *                                           | *                              | *                                          | *                                  |
| 3) <u>Ascertainment of exposure</u><br>a) secure record (eg surgical records) *<br>b) structured interview *<br>c) written self report<br>d) no description                                                                                                                                                                    | *                            | *                                          | *               | *                                | *                                           | *                              | *                                          | *                                  |
| 4) <u>Demonstration that outcome of interest was not present at start of study</u><br>a) yes *<br>b) no                                                                                                                                                                                                                        | *                            | b                                          | b               | *                                | *                                           | *                              |                                            | *                                  |
| <b>Comparability</b>                                                                                                                                                                                                                                                                                                           |                              |                                            |                 |                                  |                                             |                                |                                            |                                    |
| 1) Comparability of cohorts on the basis of the design or analysis<br>a) study controls for diagnosis *<br>b) study controls for any additional factor *                                                                                                                                                                       | *<br>*<br>(l,g)              |                                            | *<br>*<br>(l,g) | *<br>*<br>(l,g)                  | *<br>*<br>(l,g)                             |                                |                                            | * (g)                              |
| <b>Outcome</b>                                                                                                                                                                                                                                                                                                                 |                              |                                            |                 |                                  |                                             |                                |                                            |                                    |
| 1) <u>Assessment of outcome</u><br>a) independent blind assessment *<br>b) record linkage *<br>c) self report<br>d) no description                                                                                                                                                                                             | Global Trigger Tool<br>### * | Hospital Anxiety and Depression Scale ## * | *               | Clinical diagnosis of delirium * | Hospital Anxiety and Depression Scale ### * | Clinical encounters per hour * | Hospital Anxiety and Depression Scale ## * | State-Trait Anxiety Inventory ## * |
| 2) <u>Was follow-up long enough for outcomes to occur</u><br>a) yes (during hospitalisation or immediately afterwards) *<br>b) no                                                                                                                                                                                              | *                            | *                                          | *               | *                                | * 3 days                                    | *                              | *                                          |                                    |
| 3) <u>Adequacy of follow up of cohorts</u><br>a) complete follow up - all subjects accounted for *<br>b) subjects lost to follow up unlikely to introduce bias - small number lost - > 90 % follow up, or description provided of those lost) *<br>c) follow up rate < 90% and no description of those lost<br>d) no statement | *                            | *                                          | *               | *                                | *                                           | *                              | *                                          | *                                  |

Community – was hospital population  
Time to outcome of interest – question is regarding outcome during isolation

a – age  
g- gender  
l – LOS

# own scale  
## validated scale/s used appropriately

## Cohort studies (2)

| Selection                                                                                                                                                                                                                                                                                                                      | Kirkland (1999) | Lau (2016)                                                                   | Mehotra (2013)                                                           | Stelfox (2003)               | Spense (2011)       | Saint (2003)             | Tran (2016)         | Wassenberg (2010)                                 |
|--------------------------------------------------------------------------------------------------------------------------------------------------------------------------------------------------------------------------------------------------------------------------------------------------------------------------------|-----------------|------------------------------------------------------------------------------|--------------------------------------------------------------------------|------------------------------|---------------------|--------------------------|---------------------|---------------------------------------------------|
| 1) <u>Representativeness of the exposed cohort</u><br>a) truly representative of the average patient in the community *<br>b) somewhat representative of the average patient in the community *<br>c) selected group of users eg nurses, volunteers<br>d) no description of the derivation of the cohort                       | *b              | *                                                                            | *                                                                        | *                            | b                   | *                        | *                   | *                                                 |
| 2) <u>Selection of the non exposed cohort</u><br>a) drawn from the same community as the exposed cohort *<br>b) drawn from a different source<br>c) no description of the derivation of the non exposed cohort                                                                                                                 | *               | *                                                                            | *                                                                        | *                            | *                   | *                        | *                   | *                                                 |
| 3) <u>Ascertainment of exposure</u><br>a) secure record (eg surgical records) *<br>b) structured interview *<br>c) written self report<br>d) no description                                                                                                                                                                    | *               | *b                                                                           | *b                                                                       | *                            | *                   | *                        | *                   | *                                                 |
| 4) <u>Demonstration that outcome of interest was not present at start of study</u><br>a) yes *<br>b) no                                                                                                                                                                                                                        | *               | *                                                                            | *                                                                        | *                            | *                   | *                        | *                   | *                                                 |
| <b>Comparability</b>                                                                                                                                                                                                                                                                                                           |                 |                                                                              |                                                                          |                              |                     |                          |                     |                                                   |
| 1) Comparability of cohorts on the basis of the design or analysis<br>a) study controls for diagnosis *<br>b) study controls for any additional factor *                                                                                                                                                                       |                 | * (g)                                                                        | *<br>* (l,g)                                                             | *<br>* (l,g)                 |                     | *                        | *<br>* (l,g)        | (l,g)                                             |
| <b>Outcome</b>                                                                                                                                                                                                                                                                                                                 |                 |                                                                              |                                                                          |                              |                     |                          |                     |                                                   |
| 1) <u>Assessment of outcome</u><br>a) independent blind assessment *<br>b) record linkage *<br>c) self report<br>d) no description                                                                                                                                                                                             | *<br>#          | Patient Health Questionnaire-9; CQ-5D<br>c telephone /health records<br>## * | Hospital Consumer Assessment of Healthcare Providers and Systems<br>## * | Clinical satisfaction<br># * | Clinical outcomes * | Observation of doctors * | Clinical outcomes * | EQ5-D; Hospital Anxiety and Depression Scale ## * |
| 2) <u>Was follow-up long enough for outcomes to occur</u><br>a) yes (during hospitalisation or immediately afterwards) *<br>b) no                                                                                                                                                                                              | *               |                                                                              | *                                                                        | *                            | *                   | *                        | *                   | *                                                 |
| 3) <u>Adequacy of follow up of cohorts</u><br>a) complete follow up - all subjects accounted for *<br>b) subjects lost to follow up unlikely to introduce bias - small number lost - > 90 % follow up, or description provided of those lost) *<br>c) follow up rate < 90% and no description of those lost<br>d) no statement | *               |                                                                              | 37/278 contact;<br>51/290 non                                            | *                            | *                   |                          | *                   | *                                                 |

## General notes

Community – the population of interest was a hospital population

Time to outcome of interest – question is regarding outcome during isolation or shortly afterwards

1  
2  
3  
4  
5  
6  
7  
8  
9  
10  
11  
12  
13  
14  
15  
16  
17  
18  
19  
20  
21  
22  
23  
24  
25  
26  
27  
28  
29  
30  
31  
32  
33  
34  
35  
36  
37  
38  
39  
40  
41  
42  
43  
44  
45  
46  
47  
48  
49  
50  
51  
52  
53  
54  
55  
56  
57  
58  
59  
60

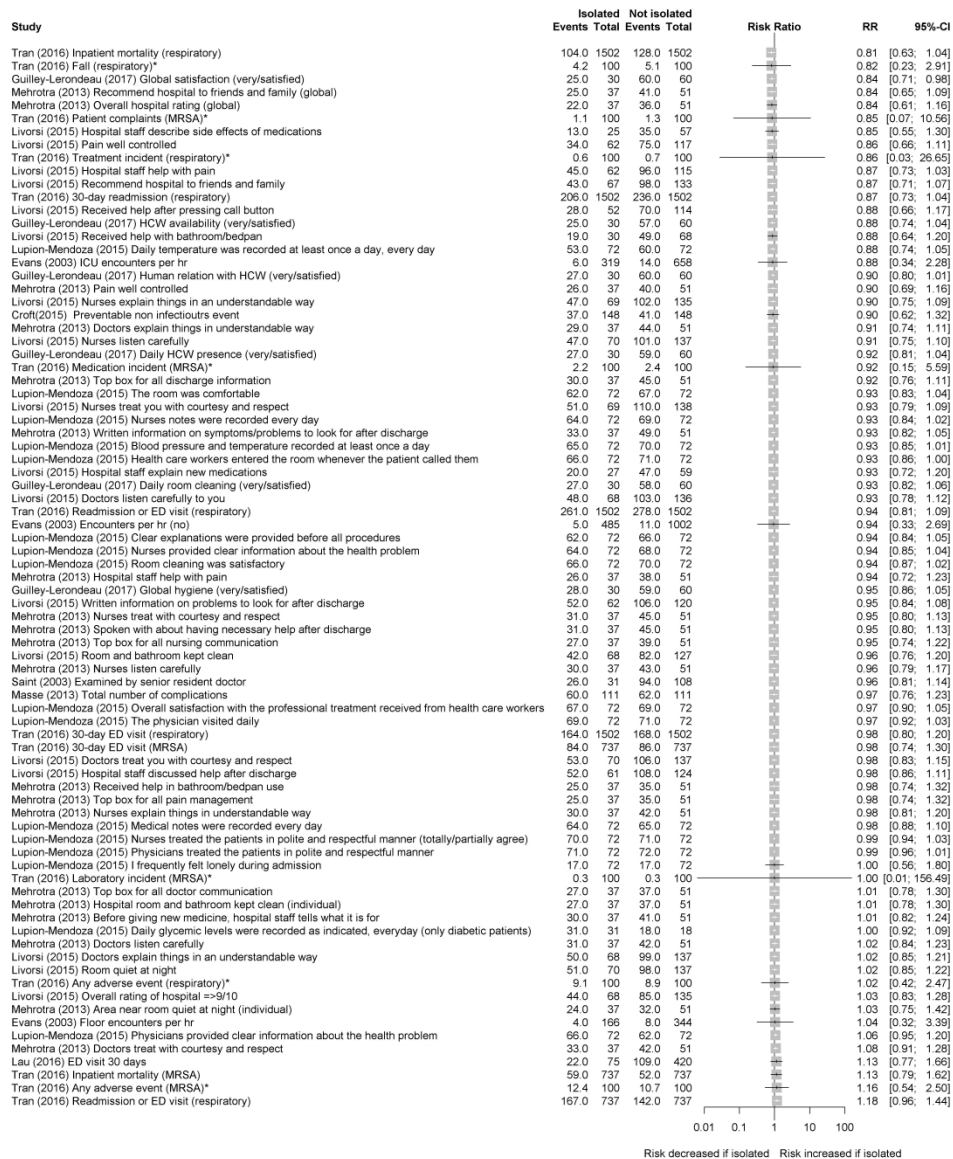

381x465mm (300 x 300 DPI)

# BMJ Open

## Impact of isolation on hospitalised patients who are infectious: systematic review with meta-analysis

|                                 |                                                                                                                                                                                                                          |
|---------------------------------|--------------------------------------------------------------------------------------------------------------------------------------------------------------------------------------------------------------------------|
| Journal:                        | <i>BMJ Open</i>                                                                                                                                                                                                          |
| Manuscript ID                   | bmjopen-2019-030371.R2                                                                                                                                                                                                   |
| Article Type:                   | Original research                                                                                                                                                                                                        |
| Date Submitted by the Author:   | 20-Nov-2019                                                                                                                                                                                                              |
| Complete List of Authors:       | Purssell, Edward; City, University of London, School of Health Sciences<br>Gould, Dinah; City, University of London, School of Health Sciences<br>Chudleigh, Jane; City, University of London, School of Health Sciences |
| <b>Primary Subject Heading</b>: | Infectious diseases                                                                                                                                                                                                      |
| Secondary Subject Heading:      | Mental health, Nursing, Patient-centred medicine                                                                                                                                                                         |
| Keywords:                       | Infection control < INFECTIOUS DISEASES, Anxiety disorders < PSYCHIATRY, Quality in health care < HEALTH SERVICES ADMINISTRATION & MANAGEMENT                                                                            |
|                                 |                                                                                                                                                                                                                          |

SCHOLARONE™  
Manuscripts



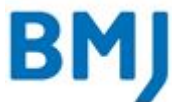

I, the Submitting Author has the right to grant and does grant on behalf of all authors of the Work (as defined in the below author licence), an exclusive licence and/or a non-exclusive licence for contributions from authors who are: i) UK Crown employees; ii) where BMJ has agreed a CC-BY licence shall apply, and/or iii) in accordance with the terms applicable for US Federal Government officers or employees acting as part of their official duties; on a worldwide, perpetual, irrevocable, royalty-free basis to BMJ Publishing Group Ltd ("BMJ") its licensees and where the relevant Journal is co-owned by BMJ to the co-owners of the Journal, to publish the Work in this journal and any other BMJ products and to exploit all rights, as set out in our [licence](#).

The Submitting Author accepts and understands that any supply made under these terms is made by BMJ to the Submitting Author unless you are acting as an employee on behalf of your employer or a postgraduate student of an affiliated institution which is paying any applicable article publishing charge ("APC") for Open Access articles. Where the Submitting Author wishes to make the Work available on an Open Access basis (and intends to pay the relevant APC), the terms of reuse of such Open Access shall be governed by a Creative Commons licence – details of these licences and which [Creative Commons](#) licence will apply to this Work are set out in our licence referred to above.

Other than as permitted in any relevant BMJ Author's Self Archiving Policies, I confirm this Work has not been accepted for publication elsewhere, is not being considered for publication elsewhere and does not duplicate material already published. I confirm all authors consent to publication of this Work and authorise the granting of this licence.

1  
2  
3 **Impact of isolation on hospitalised patients who are infectious:**  
4 **systematic review with meta-analysis**  
5  
6

7 Edward Purssell, City, University of London, London, UK  
8 Dinah Gould, City, University of London, London, UK  
9 Jane Chudleigh, City, University of London, London, UK  
10  
11  
12

13 Corresponding author:  
14 Edward Purssell,  
15 School of Health Sciences,  
16 City, University of London,  
17 1 Myddleton Street,  
18 London EC1R 1UW  
19

20  
21 Telephone: 07782 374217  
22 Fax: None  
23 Email: [edward.purssell@city.ac.uk](mailto:edward.purssell@city.ac.uk)  
24  
25

26  
27 Keywords: Contact isolation; Infection control (MeSH); Patient isolation (MeSH);  
28 Quarantine (MeSH)  
29

30  
31 Word count - excluding title page, references, figures and tables – 3 301  
32  
33  
34  
35  
36  
37  
38  
39  
40  
41  
42  
43  
44  
45  
46  
47  
48  
49  
50  
51  
52  
53  
54  
55  
56  
57  
58  
59  
60

1  
2  
3 **Impact of isolation on hospitalised patients who are infectious: systematic review**  
4  
5 **with quantitative and meta-analysis**  
6  
7  
8  
9

10 **Abstract**  
11  
12

13  
14  
15 Objective

16  
17 To systematically review the literature exploring impact of isolation on hospitalised  
18 patients who are infectious: psychological and non-psychological outcomes  
19  
20  
21  
22

23  
24 Design

25  
26 Systematic review with meta-analysis  
27  
28  
29

30  
31 Data Sources

32  
33 Embase, Medline and Psychinfo were searched from inception until December 2018.  
34  
35 Reference lists and Google Scholar were also handsearched.  
36  
37  
38  
39

40  
41 Results

42  
43 Twenty six papers published from database inception until December 2018 were  
44 reviewed. A wide range of psychological and non-psychological outcomes were  
45 reported. There was a marked trend for isolated patients to exhibit higher levels of  
46 depression, the pooled standardised mean difference being 1.28 (95% CI: 0.47 to  
47 2.09) and anxiety 1.45 (95% CI: 0.56 to 2.34), although both had high levels of  
48 heterogeneity; and worse outcomes for a range of care-related factors but with  
49 significant variation.  
50  
51  
52  
53  
54  
55  
56  
57  
58  
59  
60

## Conclusion

The review indicates that isolation to contain risk of infection has negative consequences for segregated patients. Although strength of the evidence is weak, comprising primarily single centre convenience samples, consistency of the effects may strengthen this conclusion. More research needs to be undertaken to examine this relationship and develop and test interventions to reduce the negative effects of isolation.

## Strengths and limitations of this study

- This review covers a wide variety of literature from a range of different clinical areas.
- Data collected and the methods of collecting data on the impact of isolation is varied across studies.
- These data do not show if these effects are temporary, or in most cases if they are clinically significant.

## Funding statement

This research received no specific grant from any funding agency in the public, commercial or not-for-profit sectors

## Competing interests statement

No authors have any competing interests to declare

## Introduction

Isolation is an established part of any infection prevention programme. Its purpose is to prevent the transmission of antibiotic-resistant pathogens, those that are highly contagious or cause serious infection.[1] The effectiveness of isolation has been questioned however [2–5] and it can be challenging to undertake, especially if patients' lack of understanding of the need for segregation, boredom or distress result in uncooperative behaviour. [6] A recent survey exploring the care of patients isolated for infectious conditions suggests that in clinical practice the main issues are identifying which patients need to be isolated as quickly as possible and prioritising which patients should be segregated when isolation accommodation is in short supply. Infection preventionists were aware that isolation could have negative effects on patients such as increased risk of anxiety, depression and falls and felt that more should be done to prevent these risks.[6]

Although single rooms are assumed to reduce infection risk, evidence of ability to contain spread is equivocal [7,8] and a recent study conducted in an all-single-room hospital was unable to demonstrate lower infection rates than in hospitals where most care takes place in open wards. [9] This study identified advantages and disadvantages of single room accommodation, whereas isolating infectious patients is generally assumed to result in adverse outcomes.[10]

A systematic review reported eight years ago indicated higher levels of anxiety, depression, perceptions of stigmatisation and a higher incidence of falls, medication errors and other incidents that detract from patient safety among patients who were isolated compared to those who were not.[11] This review reported studies undertaken

1  
2  
3 before 2010 and included patients whose experiences are unlikely to be comparable:  
4  
5 children and adults and those isolated to reduce their own risk of infection as well as  
6  
7 infectious patients. The review was not reported according to standards currently  
8  
9 expected for systematic reviews [12] and presents a qualitative description of patient  
10  
11 outcomes only. A more rigorously reported and up-to-date systematic review is  
12  
13 indicated in view of increasing concern about satisfaction with health care and patient  
14  
15 safety and increasing emphasis on infection prevention as part of the global strategy  
16  
17 to reduce risks of antimicrobial resistance.[13]  
18  
19  
20  
21  
22  
23

24 We undertook a systematic review of the literature to establish the effects of infection  
25  
26 related isolation on psychological and non-psychological care-related outcomes in  
27  
28 adults. This review is therefore more focussed than that previously undertaken which  
29  
30 also included those in protective isolation, and contains a significant body of literature  
31  
32 published since 2010.  
33  
34  
35  
36

### 37 **Method**

38  
39 The eligibility criteria for inclusion was that studies should compare quantitative data  
40  
41 on psychological or non-psychological outcomes in adult patients who are in infective  
42  
43 isolation with those not isolated. Purely symptomatic/disease progression outcomes  
44  
45 were not included, neither were those looking at patients isolated due to  
46  
47 immunosuppression. Studies not containing comparative data between those isolated  
48  
49 and not isolated were also excluded. Search terms were: Patient isolation; cross  
50  
51 infection; contact isolation; respiratory, source or contact isolation; droplet, airborne  
52  
53 or contact precautions; cubicle; MRSA or methicillin resistant *Staphylococcus aureus*;  
54  
55 patient safety or harm; depression; anxiety; adaptation; stress; patient satisfaction;  
56  
57  
58  
59  
60

1  
2  
3 quality of life. These were searched as free-text and index terms where these existed.  
4  
5 The information sources used were Embase, Medline and Psycinfo, which were  
6  
7 searched from inception until December 2018. Reference lists and Google Scholar  
8  
9 were also handsearched. Characteristics of included and excluded papers are shown  
10  
11 in Supplementary File 1. The PRISMA flow-chart is given in Supplementary File 2.  
12  
13  
14 No protocol was published in advance.  
15  
16

17  
18  
19 Studies were initially screened for relevance by one author (EP), with the final stage  
20  
21 being undertaken by two (EP, DG). Data were extracted and checked by two authors  
22  
23 (DG, EP); where there were disagreements data were rechecked for relevance and  
24  
25 accuracy. Where available, raw data were extracted and entered into a spreadsheet,  
26  
27 and depending upon the nature of the data either the risk ratio (where numbers of  
28  
29 patients were given) or standardised mean difference (where other statistics were  
30  
31 given) calculated. Results were then presented as forest plots.  
32  
33  
34  
35  
36

37  
38 Due to the variety of different settings and methods it was deemed that the  
39  
40 methodological and clinical heterogeneity was too broad to pool results; apart from  
41  
42 those related to anxiety and depression, for which results were pooled using the  
43  
44 random-effects model. This model assumes that the observed effect from each study  
45  
46 is estimating a related but different true effect, allowing for between-study variation  
47  
48 to be calculated in the form of heterogeneity statistics. All calculations and plots were  
49  
50 produced using the meta and metafor packages in R.[14–16] Where raw data were  
51  
52 not provided the summary results are given in the text but not the forest plots. All data  
53  
54 relevant to the study are included in the article or uploaded as Supplementary File 3.  
55  
56  
57  
58  
59  
60

## Patient and Public Involvement

No patient involved.

## Results

A total of 3 879 papers were retrieved from the three databases; of which 34 were assessed for eligibility by reading the full text. Of these 13 studies provided data suitable for the calculation of risk ratio, 5 giving psychological outcomes,[17–21] and 12 non-psychological;[19,22–32] and 8 provided data for the calculation of standardised mean differences, 6 giving psychological outcomes,[21,30,33–36] and 2 non-psychological.[29,37] A further 6 studies did not provide raw data but are included in the results; 3 each giving psychological outcomes[38–40] and non-psychological outcomes.[17,41,42] Meta-analyses were possible on two outcomes: anxiety and depression from 8 studies using standardised mean difference. [19–21,30,33–36] Where only risk ratio data were given[20,21] conversion to standardised mean difference was undertaken using the Campbell Collaboration calculator (<https://campbellcollaboration.org/research-resources/effect-size-calculator.html>).[43]

Where it was not possible to pool outcome data because of methodological and clinical heterogeneity, the data from studies are shown as forest plots but without meta-analysis. The forest plots contain results from the studies where sufficient data were given to calculate either the risk ratio or standardised mean difference. A number of studies provided data on those under contact precautions, but no comparative data and so were not included.[44–47]



1  
2  
3 Because of the large number of non-psychological outcomes for which RR could be  
4 calculated, it was decided that a change of 20% (i.e. a RR of 0.8 or less, or 1.2 or  
5 more) would be clinically significant, regardless of the statistical significance. This  
6 was a pragmatic decision, and all results are shown in Supplementary File 3. Results  
7 are shown in Figures 1 to 6. Supplementary Figure 1 contains results that did not  
8 meet our criteria for being clinically significant. Outcomes were classified into one of  
9 three categories: those to do with quality of care; satisfaction of care; and adverse  
10 events from which median values and interquartile ranges were calculated.  
11  
12  
13  
14  
15  
16  
17  
18  
19  
20  
21  
22  
23

24 The studies included were primarily single-centre and consisted of case-control,  
25 cross-sectional and cohort studies. Risk of bias was assessed using the Newcastle-  
26 Ottawa scale, full details of each study and its risk of bias are in the Supplementary  
27 File 4.[48] Overall, although these studies have limited generalisability, there did not  
28 appear to be significant cause for concern regarding bias within the limitations  
29 inherent in these study designs. Most studies used established or validated tools[17–  
30 21,23–25,27,29,30,33–37] or clinical outcomes.[22,26,28,31,32]  
31  
32  
33  
34  
35  
36  
37  
38  
39  
40  
41  
42

43 The data from the comparative studies suggest that although in many cases infective  
44 isolation precautions make little difference to psychological outcomes, where it does  
45 make a difference this is primarily negative. There were significant declines in mean  
46 scores related to control and self-esteem, and in many studies increases in the mean  
47 scores for risk of anxiety and depression. However, these findings were not  
48 consistent, and some larger studies showed little or no difference between the groups  
49 for these outcomes. These are shown in Figures 1 and 2 respectively.  
50  
51  
52  
53  
54  
55  
56  
57  
58  
59  
60

1  
2  
3 [INSERT FIGURES 1 and 2 HERE]  
4  
5  
6  
7

8 Figure 1. Risk ratio of psychological events in those isolated versus not isolated  
9

10  
11  
12 Figure 2. Standardised mean difference of psychological scores in those isolated  
13  
14  
15 versus those not isolated  
16

17  
18  
19 For the 8 studies reporting data on anxiety the pooled SMD was 1.45 (95% CI: 0.56 to  
20  
21 2.34); although within this there was significant heterogeneity ( $Q = 168.11$ ,  $df = 7$ ,  $p$   
22  
23  $< 0.0001$ ;  $I^2 = 95.84\%$ ). This was primarily caused by two studies [30,34] which  
24  
25 showed lower levels of anxiety than the remaining studies. For depression the SMD  
26  
27 was 1.28 (95% CI: 0.47 to 2.09); again with significant heterogeneity ( $Q = 154.5$ ,  $df =$   
28  
29  $7$ ,  $p < 0.0001$ ;  $I^2 = 95.47\%$ ), in this case the studies falling into two categories, those  
30  
31 with lower [30,34,35] and higher depression scores among those  
32  
33 isolated.[19,20,33,36] The forest plots for these outcomes are shown in Figures 3 and  
34  
35  
36  
37  
38  
39  
40  
41  
42  
43  
44  
45  
46  
47  
48  
49  
50  
51  
52  
53  
54  
55  
56  
57  
58  
59  
60

42 [INSERT FIGURES 3 and 4 HERE]  
43  
44  
45  
46  
47  
48  
49  
50  
51  
52  
53  
54  
55  
56  
57  
58  
59  
60

47 Figure 3. Meta-analysis of the standardised mean difference of anxiety in those  
48  
49 isolated versus those not isolated  
50  
51  
52  
53

54 Figure 4. Meta-analysis of the standardised mean difference of depression in those  
55  
56 isolated versus those not isolated  
57  
58  
59  
60

1  
2  
3 Studies not reporting the raw data showed that contact precautions were associated  
4 with depression OR 1.4 (95% CI 1.2 to 1.5) but not anxiety OR 0.8 (95% CI 0.7 to  
5 1.1) in a non-ICU population.[41] There was also an association with delirium OR  
6 1.40 (95% CI 1.24 to 1.51); although this was primarily among those who were newly  
7 diagnosed as needing isolation OR 1.75 (95% CI 1.60 to 1.92,  $p < 0.01$ ) rather than  
8 those who had been under contact precautions for their entire stay OR 0.97 (95% CI  
9 0.86 to 1.09,  $p = 0.60$ ).[17] Another study showed no difference in the median values  
10 for the Hospital Anxiety and Depression Scale anxiety or depression scores (HADS-A  
11 and -D), or the EuroQol Visual Analogue Scale EQ VAS scores.[42]

12  
13  
14  
15  
16  
17  
18  
19  
20  
21  
22  
23  
24  
25  
26 For non-psychological outcomes, using a difference in the risk of +/- 20% of an event  
27 as being a measure of clinical significance it appears there was a trend for less  
28 attention to be given to, and for more errors to occur in those who were isolated.  
29  
30  
31  
32  
33 However, again there was wide variation between studies. Data on these outcomes  
34 are given in Figures 5 and 6, and the non-clinically significant risks in the  
35  
36  
37  
38  
39  
40  
41  
42  
43  
44  
45  
46  
47  
48  
49  
50  
51  
52  
53  
54  
55  
56  
57  
58  
59  
60  
Supplementary Figure 1. For those outcomes associated with quality, the median risk  
ratio (with positive outcomes reversed so a higher risk ratio is associated with a worse  
outcome) was 0.94 (IQR 0.92 to 0.98), satisfaction 0.95 (IQR 0.89 to 1.01) and  
adverse events was 1.27 (0.91 to 2.5). The minimum and maximum risk ratio for  
each category was 0.49 and 1.72; 0.3 and 8; and 0.3 and 18 respectively.

[INSERT FIGURES 5 and 6 HERE]

Figure 5. Risk ratio of non-psychological events in those isolated versus not isolated  
with a RR of  $\leq 0.8$  or  $\geq 1.2$

\* outcome was measured in rate per 100 admissions

Figure 6. Standardised mean difference of non-psychological scores in those isolated versus those not isolated

FIM – functional independence measure

A study not giving raw data which looked at the rates of falls and pressure ulcers before and after a policy change that resulted in the discontinuation of contact precautions for patients with methicillin resistant *Staphylococcus aureus* (MRSA) or vancomycin resistant enterococci (VRE) found that falls and pressure ulcers were more common among those with MRSA or VRE both before the change (when they were in isolation) and afterwards (when they were not). Before the change the number of falls was 4.57 vs 2.04 per 1000 patient-days respectively ( $p < 0.0001$ ) and pressure ulcers 4.87 vs 1.22 per 1000 patient-days ( $p < 0.0001$ ). After the policy change the same numbers were falls 4.82 vs 2.10 ( $p < 0.0001$ ) and pressure ulcers 4.17 vs 1.19 per 1000 patient-days ( $p < 0.0001$ ). [39] Other studies found that staff spent less time with those on contact precautions: internal medicine interns spent less time with their isolated patients compared to non-isolated patients, the median times being 5.2 and 6.9 minutes respectively ( $p < 0.001$ ) [38]; while the mean number of contacts per hour with healthcare workers was 2.1 compared to 4.2 in those not isolated ( $p = 0.03$ ), although the duration was longer at 4.5 minutes compared to 2.8 ( $p = 0.6$ ). [40]

## Discussion

Current recommendations say that contact precautions should include a single room, with personal protective equipment consisting of a gown and gloves for all patient

1  
2  
3 contacts or contacts with potentially contaminated environmental areas.[1] This  
4  
5 review has shown that there are a number of apparently negative aspects to contact  
6  
7 precautions, in particular with regards to psychological effects and a reduction in the  
8  
9 quality of some aspects of care. These data come from studies carried out in a variety  
10  
11 of countries and different types of facilities; although there are few data from  
12  
13 particularly vulnerable populations such as the elderly.  
14  
15  
16  
17  
18

19 Although at times there are discussions as to the necessity of contact precautions for  
20  
21 drug resistant organisms, with some arguing that there is mixed evidence for or  
22  
23 against their use[49] another recent review has concluded that they are of great  
24  
25 importance in the control of epidemic and endemic multidrug-resistant  
26  
27 microorganisms.[50] The ethics of using contact precautions and other forms of  
28  
29 isolation rely on a positive assessment of the balance between the risks and benefits of  
30  
31 this to the individual concerned and that of the broader population of patients and  
32  
33 staff.[51] However, even when this assessment is positive, it is important to ensure  
34  
35 that any harm to the individual is minimised.  
36  
37  
38  
39  
40  
41

42 One way of balancing the various priorities is to use the GRADE Evidence to  
43  
44 Decision Framework, which provides criteria for making recommendations at the  
45  
46 individual, group and policy-levels, and provides a number of highly patient focussed  
47  
48 criteria for doing this. In addition to the certainty of evidence and resource  
49  
50 requirements, it also requires consideration of: the balance of desirable and  
51  
52 undesirable effects; the impact upon equity; and the feasibility and acceptability of the  
53  
54 intervention.[52] The last two of these might have very different outcomes when  
55  
56 considered at the population and individual levels; and there is certainly evidence here  
57  
58  
59  
60

1  
2  
3 that for the individual patient the balance of desirable and undesirable effects might  
4  
5 be very different to that of the broader population.  
6  
7  
8  
9

10 However, within the broad population of infected or potentially infected patients,  
11  
12 some groups might have different needs. For example a study of people isolated for  
13  
14 MERS found that while access to telephones reduced anxiety and anger; access to  
15  
16 email, text and internet increased these.[53] This was not an area investigated in any  
17  
18 depth in these studies. Another area where information may be lacking is that of age,  
19  
20 as older people in particular might feel sadness and loneliness more; and gender, as  
21  
22 as older people in particular might feel sadness and loneliness more; and gender, as  
23  
24 qualitative data suggest that women in isolation were more concerned about  
25  
26 precautions and transmission while men were more resigned, rational and tended to  
27  
28 cope better.[54]  
29  
30  
31  
32

33 In some countries, such as the United States single-rooms have become the standard  
34  
35 for new hospitals and so one might expect fewer adverse effects if everyone is in a  
36  
37 single room, this being the norm. However it may be that a single room is necessary  
38  
39 but not sufficient for these findings, and that it is the combination of a single room  
40  
41 with an infection that leads to these results. Certainly it is far from clear that the long  
42  
43 list of advantages claimed for single rooms which include reduced stress, the ability to  
44  
45 deliver better care, and a lower probability of dietary or medication errors apply to  
46  
47 this group of patients.[55]  
48  
49  
50  
51  
52

53 Caring for patients in single-rooms does have many challenges, but there is evidence  
54  
55 that these can be mitigated in a general population;[9] however the expanding  
56  
57 literature on how this can be done in a general population does not necessarily apply  
58  
59  
60

1  
2  
3 here due to the necessity of isolation procedures which are, by design, ‘a barrier’.  
4  
5 Therefore patients’ needs for greater social interaction will need a solution quite  
6  
7 different from that which might be used for a different patient population, and the  
8  
9 benefit of choice about this which single rooms offer does not apply here.[56]  
10  
11  
12  
13

14 Although this review has quantified the extent of the problem, we have not been able  
15  
16 to find solutions in the literature. Care might be improved through increased staff  
17  
18 attention with more resources being allocated to these patients, although the extra cost  
19  
20 of contact precautions is already considerable, one estimate being that it was an extra  
21  
22 \$158.90 (95% CI \$124.90 to \$192.80) per patient day.[57] Alternatively new ways of  
23  
24 working might be developed, perhaps using technology to mitigate some of these  
25  
26 problems. Technology might be particularly useful in reducing adverse events such  
27  
28 as medication or clinical errors; although increasing satisfaction and some areas of  
29  
30 quality are more likely to be achieved by increasing the availability of staff and other  
31  
32 people. The extent to which scarce resources are allocated to this may be driven in  
33  
34 part by the longevity of any negative effects; which current literature is not really able  
35  
36 to clarify. To understand this longitudinal studies are needed.  
37  
38  
39  
40  
41  
42  
43  
44

#### 45 Study strengths and limitations

46 This review suggests that infectious isolation has a number of negative effects on  
47  
48 patients. Because this evidence is comprised of cohort and case-control studies, a  
49  
50 claim for a causal relationship can not be made on this evidence, although the strong  
51  
52 and consistent effects across the studies may increase the confidence in this  
53  
54 relationship. There are some qualitative data, although more in-depth mixed-methods  
55  
56 data where those reporting negative effects are questioned about them would  
57  
58  
59  
60

1  
2  
3 strengthen the evidence on this. In some cases large effect sizes were accompanied  
4  
5 by very wide confidence intervals, suggesting that studies were underpowered, thus  
6  
7 studies with larger sample sizes would be useful. It would also be useful if there were  
8  
9 more consistent methods of examining and reporting these data, particularly outside  
10  
11 of the realms of depression and anxiety where the variety of methods makes analysis  
12  
13 of the body of evidence difficult. We were also unable to assess whether these effects  
14  
15 varied according to reason for isolation; or to understand if they are likely to be long-  
16  
17 term or simply temporary phenomena.  
18  
19  
20  
21  
22

23  
24 Although these data suggest that there is a problem, there is a clear gap both in what  
25  
26 we know about improving the experience of isolation and what can be done in  
27  
28 practical terms to make it more tolerable for patients and their families. In particular  
29  
30 older people who may be most vulnerable to these negative effects were under-  
31  
32 represented in these studies; and this group are likely to represent an increasingly  
33  
34 large proportion of those isolated.  
35  
36  
37  
38  
39  
40  
41

#### 42 Contributors

43  
44 EP, DG and JC conceived the review, EP conducted the search, EP and DG examined  
45  
46 the studies and extracted data, EP undertook the quantitative analysis, EP, DG and JC  
47  
48 wrote the discussion.  
49  
50  
51

#### 52 Funding

53  
54 This research received no specific grant from any funding agency in the public,  
55  
56 commercial or not-for-profit sector.  
57  
58  
59  
60



1  
2  
3  
4  
5  
6 Competing interests statement  
7

8 No authors have any competing interests to declare.  
9  
10  
11  
12  
13

14 Data Availability  
15

16 All data relevant to the study are included in the article or uploaded as supplementary  
17 information.  
18  
19  
20  
21  
22  
23  
24  
25  
26  
27  
28  
29  
30  
31  
32  
33  
34  
35  
36  
37  
38  
39  
40  
41  
42  
43  
44  
45  
46  
47  
48  
49  
50  
51  
52  
53  
54  
55  
56  
57  
58  
59  
60

## References

- 1 Centres for Disease Control and Prevention. Transmission-Based Precautions | Basics | Infection Control | CDC. 2007. <https://www.cdc.gov/infectioncontrol/basics/transmission-based-precautions.html> (accessed 9 Feb 2019).
- 2 Barlow GD, Knight J, McKay I, *et al.* An audit of the use of side- and isolation room facilities in a UK teaching hospital. *J Hosp Infect* 2006;**62**:110–2. doi:10.1016/j.jhin.2005.05.006
- 3 Fusco FM, Puro V, Baka A, *et al.* Isolation rooms for highly infectious diseases: an inventory of capabilities in European countries. *J Hosp Infect* 2009;**73**:15–23. doi:10.1016/j.jhin.2009.06.009
- 4 Damji S, Barlow GD, Patterson L, *et al.* An audit of the use of isolation facilities in a UK National Health Service trust. *J Hosp Infect* 2005;**60**:213–7. doi:10.1016/j.jhin.2004.11.013
- 5 Wigglesworth N, Wilcox MH. Prospective evaluation of hospital isolation room capacity. *J Hosp Infect* 2006;**63**:156–61. doi:10.1016/j.jhin.2006.02.008
- 6 Gould DJ, Drey NS, Chudleigh J, *et al.* Isolating infectious patients: organizational, clinical, and ethical issues. *Am J Infect Control* 2018;**46**:e65–9. doi:10.1016/j.ajic.2018.05.024
- 7 Dettenkofer M, Wenzler S, Amthor S, *et al.* Does disinfection of environmental surfaces influence nosocomial infection rates? A systematic review. *Am J Infect Control* 2004;**32**:84–9. doi:10.1016/j.ajic.2003.07.006

- 1  
2  
3 8 Zingg W, Holmes A, Dettenkofer M, *et al.* Hospital organisation, management,  
4 and structure for prevention of health-care-associated infection: a systematic  
5 review and expert consensus. *Lancet Infect Dis* 2015;**15**:212–24.  
6  
7 doi:10.1016/S1473-3099(14)70854-0  
8  
9  
10  
11  
12  
13 9 Simon M, Maben J, Murrells T, *et al.* Is single room hospital accommodation  
14 associated with differences in healthcare-associated infection, falls, pressure  
15 ulcers or medication errors? A natural experiment with non-equivalent controls.  
16  
17 *Journal of Health Services Research & Policy* 2016;**21**:147–55.  
18  
19 doi:10.1177/1355819615625700  
20  
21  
22  
23  
24  
25  
26 10 Barratt RL, Shaban R, Moyle W. Patient experience of source isolation: lessons  
27 for clinical practice. *Contemp Nurse* 2011;**39**:180–93. doi:10.5172/conu.2011.180  
28  
29  
30  
31  
32 11 Abad C, Fearday A, Safdar N. Adverse effects of isolation in hospitalised  
33 patients: a systematic review. *Journal of Hospital Infection* 2010;**76**:97–102.  
34  
35 doi:10.1016/j.jhin.2010.04.027  
36  
37  
38  
39  
40 12 Moher D, Liberati A, Tetzlaff J, *et al.* Preferred reporting items for systematic  
41 reviews and meta-analyses: the PRISMA statement. *BMJ* 2009;**339**:b2535.  
42  
43 doi:10.1136/bmj.b2535  
44  
45  
46  
47 13 World Health Organization. *Global action plan on antimicrobial resistance.*  
48  
49 *World Health Organization.* Geneva, Switzerland: : World Health Organization  
50  
51 2015. <http://www.who.int/iris/handle/10665/193736>  
52  
53  
54  
55 14 R Core Team. *R: A language and environment for statistical computing.* Vienna,  
56  
57 Austria: 2018. <https://www.R-project.org/>  
58  
59  
60

- 1  
2  
3 15 Schwarzer G. meta: An R package for meta-analysis. *R News* 2007;**7**:40–5.  
4  
5  
6  
7 16 Viechtbauer W. Conducting Meta-analyses in R with the R metafor package. *J*  
8  
9 *Stat Soft* 2010;**36**. doi:10.18637/jss.v036.i03  
10  
11  
12 17 Day HR, Perencevich EN, Harris AD, *et al*. Association between contact  
13  
14 precautions and delirium at a tertiary care center. *Infection Control & Hospital*  
15  
16 *Epidemiology* 2012;**33**:34–9. doi:10.1086/663340  
17  
18  
19 18 Day HR, Perencevich EN, Harris AD, *et al*. Depression, anxiety, and moods of  
20  
21 hospitalized patients under contact precautions. *Infection Control & Hospital*  
22  
23 *Epidemiology* 2013;**34**:251–8. doi:10.1086/669526  
24  
25  
26  
27 19 Lupión-Mendoza C, Antúnez-Domínguez MJ, González-Fernández C, *et al*.  
28  
29 Effects of isolation on patients and staff. *American Journal of Infection Control*  
30  
31 2015;**43**:397–9. doi:10.1016/j.ajic.2015.01.009  
32  
33  
34  
35 20 Soon MML, Madigan E, Jones KR, *et al*. An exploration of the psychologic  
36  
37 impact of contact isolation on patients in Singapore. *American Journal of*  
38  
39 *Infection Control* 2013;**41**:e111–3. doi:10.1016/j.ajic.2013.01.037  
40  
41  
42  
43 21 Tarzi S, Kennedy P, Stone S, *et al*. Methicillin-resistant *Staphylococcus aureus*:  
44  
45 psychological impact of hospitalization and isolation in an older adult population.  
46  
47 *Journal of Hospital Infection* 2001;**49**:250–4. doi:10.1053/jhin.2001.1098  
48  
49  
50  
51 22 Tran K, Bell C, Stall N, *et al*. The Effect of Hospital Isolation Precautions on  
52  
53 Patient Outcomes and Cost of Care: A Multi-Site, Retrospective, Propensity  
54  
55 Score-Matched Cohort Study. *J Gen Intern Med* 2017;**32**:262–8.  
56  
57  
58  
59 doi:10.1007/s11606-016-3862-4  
60

- 1  
2  
3 23 Guilley-Lerondeau B, Bourigault C, Guille des Buttes A-C, *et al.* Adverse effects  
4 of isolation: a prospective matched cohort study including 90 direct interviews of  
5 hospitalized patients in a French University Hospital. *European Journal of*  
6  
7  
8  
9  
10  
11  
12  
13  
14  
15  
16 24 Mehrotra P, Croft L, Day HR, *et al.* Effects of contact precautions on patient  
17 perception of care and satisfaction: A prospective cohort study. *Infection Control*  
18  
19  
20  
21  
22  
23  
24 25 Livorsi DJ, Kundu MG, Batteiger B, *et al.* Effect of contact precautions for  
25 MRSA on patient satisfaction scores. *Journal of Hospital Infection* 2015;**90**:263–  
26  
27  
28 6. doi:10.1016/j.jhin.2015.02.007  
29  
30  
31  
32 26 Evans HL, Shaffer MM, Hughes MG, *et al.* Contact isolation in surgical patients:  
33 A barrier to care? *Surgery* 2003;**134**:180–8. doi:10.1067/msy.2003.222  
34  
35  
36  
37 27 Croft LD, Liquori M, Ladd J, *et al.* The effect of contact precautions on frequency  
38 of hospital adverse events. *Infection Control & Hospital Epidemiology*  
39  
40  
41  
42  
43  
44  
45 28 Saint S, Higgins LA, Nallamotheu BK, *et al.* Do physicians examine patients in  
46 contact isolation less frequently? A brief report. *Am J Infect Control*  
47  
48  
49  
50  
51  
52  
53 29 Masse V, Valiquette L, Boukhoudmi S, *et al.* Impact of methicillin resistant  
54 Staphylococcus aureus contact isolation units on medical care. *PLoS ONE*  
55  
56  
57  
58  
59  
60

- 1  
2  
3 30 Lau D, Majumdar SR, McAlister FA. Patient isolation precautions and 30-day  
4 risk of readmission or death after hospital discharge: a prospective cohort study.  
5  
6 *International Journal of Infectious Diseases* 2016;**43**:74–6.  
7  
8 doi:10.1016/j.ijid.2015.12.018  
9  
10  
11  
12  
13 31 Spence MR, McQuaid M. The interrelationship of isolation precautions and  
14 adverse events in an acute care facility. *American Journal of Infection Control*  
15  
16 2011;**39**:154–5. doi:10.1016/j.ajic.2010.04.213  
17  
18  
19  
20  
21 32 Stelfox HT. Safety of Patients Isolated for Infection Control. *JAMA*  
22  
23 2003;**290**:1899. doi:10.1001/jama.290.14.1899  
24  
25  
26  
27 33 Gammon J. Analysis of the stressful effects of hospitalisation and source isolation  
28 on coping and psychological constructs. *Int J Nurs Pract* 1998;**4**:84–96.  
29  
30  
31  
32 34 Findik UY, Ozbaş A, Cavdar I, *et al.* Effects of the contact isolation application  
33 on anxiety and depression levels of the patients: Effects of the contact isolation  
34 application. *International Journal of Nursing Practice* 2012;**18**:340–6.  
35  
36 doi:10.1111/j.1440-172X.2012.02049.x  
37  
38  
39  
40  
41  
42  
43 35 Kennedy P, Hamilton LR. Psychological impact of the management of  
44 methicillin-resistant *Staphylococcus aureus* (MRSA) in patients with spinal cord  
45 injury. *Spinal Cord* 1997;**35**:617–9.  
46  
47  
48  
49  
50 36 Day HR, Morgan DJ, Himelhoch S, *et al.* Association between depression and  
51 contact precautions in veterans at hospital admission. *American Journal of*  
52  
53 *Infection Control* 2011;**39**:163–5. doi:10.1016/j.ajic.2010.06.024  
54  
55  
56  
57  
58  
59  
60

- 1  
2  
3 37 Colorado B, Del Toro D, Tarima S. Impact of Contact Isolation on FIM Score  
4 Change, FIM Efficiency Score, and Length of Stay in Patients in Acute Inpatient  
5 Rehabilitation Facility. *PM&R* 2014;**6**:988–91. doi:10.1016/j.pmrj.2014.05.017  
6  
7  
8  
9  
10  
11 38 Dashiell-Earp CN, Bell DS, Ang AO, *et al.* Do physicians spend less time with  
12 patients in contact isolation?: a time-motion study of internal medicine interns.  
13 *JAMA Intern Med* 2014;**174**:814–5. doi:10.1001/jamainternmed.2014.537  
14  
15  
16  
17  
18  
19 39 Gandra S, Barysaukas CM, Mack DA, *et al.* Impact of contact precautions on  
20 falls, pressure ulcers and transmission of MRSA and VRE in hospitalized  
21 patients. *Journal of Hospital Infection* 2014;**88**:170–6.  
22  
23  
24  
25  
26  
27  
28  
29 40 Kirkland KB, Weinstein JM. Adverse effects of contact isolation. *Lancet*  
30 1999;**354**:1177–8. doi:10.1016/S0140-6736(99)04196-3  
31  
32  
33  
34  
35 41 Day HR, Perencevich EN, Harris AD, *et al.* Do contact precautions cause  
36 depression? A two-year study at a tertiary care medical centre. *Journal of*  
37  
38  
39  
40  
41  
42  
43 42 Wassenberg MWM, Severs D, Bonten MJM. Psychological impact of short-term  
44 isolation measures in hospitalised patients. *Journal of Hospital Infection*  
45  
46  
47  
48  
49  
50  
51 43 Wilson DB. Practical Meta-Analysis Effect Size Calculator [Online calculator].  
52  
53  
54  
55  
56  
57  
58  
59  
60

- 1  
2  
3 44 Chittick P, Koppisetty S, Lombardo L, *et al.* Assessing patient and caregiver  
4 understanding of and satisfaction with the use of contact isolation. *American*  
5  
6 *Journal of Infection Control* 2016;**44**:657–60. doi:10.1016/j.ajic.2015.12.033  
7  
8  
9  
10  
11 45 Davies H, Rees J. Psychological effects of isolation nursing (1): Mood  
12 disturbance. *Nurs Stand* 2000;**14**:35–8. doi:10.7748/ns2000.03.14.28.35.c2799  
13  
14  
15  
16 46 Rees J, Davies HR, Birchall C, *et al.* Psychological effects of source isolation  
17 nursing (2): Patient satisfaction. *Nurs Stand* 2000;**14**:32–6.  
18  
19  
20  
21  
22  
23  
24  
25 47 Wilkins EG, Ellis ME, Dunbar EM, *et al.* Does isolation of patients with  
26  
27  
28  
29  
30  
31 48 Wells G, Shea B, O’Connell D, *et al.* The Newcastle-Ottawa Scale (NOS) for  
32  
33  
34  
35  
36  
37  
38  
39  
40  
41 49 Cohen CC, Cohen B, Shang J. Effectiveness of contact precautions against  
42  
43  
44  
45  
46  
47  
48  
49  
50  
51 50 Landelle C, Pagani L, Harbarth S. Is patient isolation the single most important  
52  
53  
54  
55  
56  
57  
58  
59  
60



- 1  
2  
3 51 Santos RP, Mayo TW, Siegel JD. Healthcare epidemiology: Active surveillance  
4 cultures and contact precautions for control of multidrug-resistant organisms:  
5 Ethical considerations. *Clinical Infectious Diseases* 2008;**47**:110–6.  
6  
7  
8  
9  
10  
11  
12  
13  
14 52 Alonso-Coello P, Oxman AD, Moberg J, *et al.* GRADE Evidence to Decision  
15 (EtD) frameworks: a systematic and transparent approach to making well  
16 informed healthcare choices. 2: Clinical practice guidelines. *BMJ* 2016;:i2089.  
17  
18  
19  
20  
21  
22  
23  
24 53 Jeong H, Yim HW, Song Y-J, *et al.* Mental health status of people isolated due to  
25 Middle East Respiratory Syndrome. *Epidemiology and Health* 2016;**38**:e2016048.  
26  
27  
28  
29  
30  
31  
32  
33  
34 54 Madsen A. Experience of source isolation during hospitalization – a qualitative  
35 study. *Antimicrobial Resistance and Infection Control* 2015;**4**. doi:10.1186/2047-  
36 2994-4-S1-P95  
37  
38  
39  
40  
41  
42  
43  
44  
45  
46  
47  
48  
49  
50  
51  
52  
53  
54  
55  
56  
57  
58  
59  
60
- 55 Rechel B, European Health Property Network, European Observatory on Health  
Systems and Policies, editors. *Investing in hospitals of the future*. Copenhagen: :  
World Health Organization, European Observatory on Health Systems and  
Policies 2009.
- 56 Persson E, Anderberg P, Kristensson Ekwall A. A room of one's own - Being  
cared for in a hospital with a single-bed room design. *Scandinavian Journal of  
Caring Sciences* 2015;**29**:340–6. doi:10.1111/scs.12168

1  
2  
3 57 Roth JA, Hornung-Winter C, Radicke I, *et al.* Direct Costs of a Contact Isolation

4  
5 Day: A Prospective Cost Analysis at a Swiss University Hospital. *Infection*

6  
7  
8 *Control & Hospital Epidemiology* 2018;**39**:101–3. doi:10.1017/ice.2017.258

9  
10  
11  
12  
13  
14  
15  
16  
17  
18  
19  
20  
21  
22  
23  
24  
25  
26  
27  
28  
29  
30  
31  
32  
33  
34  
35  
36  
37  
38  
39  
40  
41  
42  
43  
44  
45  
46  
47  
48  
49  
50  
51  
52  
53  
54  
55  
56  
57  
58  
59  
60

For peer review only

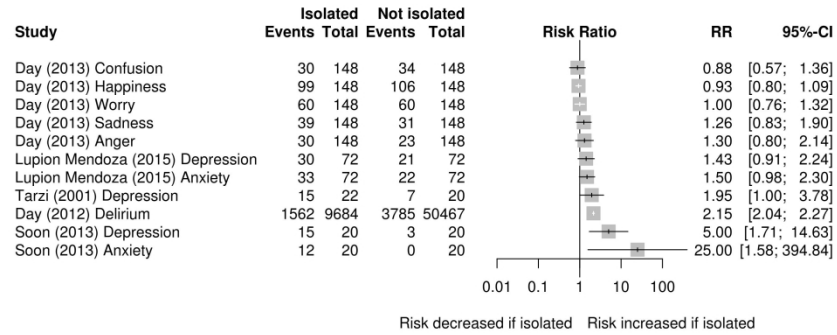

Figure 1. Risk ratio of psychological events in those isolated versus not isolated

279x127mm (300 x 300 DPI)



Figure 2. Standardised mean difference of psychological scores in those isolated versus those not isolated

279x152mm (300 x 300 DPI)

1  
2  
3  
4  
5  
6  
7  
8  
9  
10  
11  
12  
13  
14  
15  
16  
17  
18  
19  
20  
21  
22  
23  
24  
25  
26  
27  
28  
29  
30  
31  
32  
33  
34  
35  
36  
37  
38  
39  
40  
41  
42  
43  
44  
45  
46  
47  
48  
49  
50  
51  
52  
53  
54  
55  
56  
57  
58  
59  
60



Figure 3. Meta-analysis of the standardised mean difference of anxiety in those isolated versus those not isolated

169x169mm (300 x 300 DPI)



Figure 4. Meta-analysis of the standardised mean difference of depression in those isolated versus those not isolated

169x169mm (300 x 300 DPI)

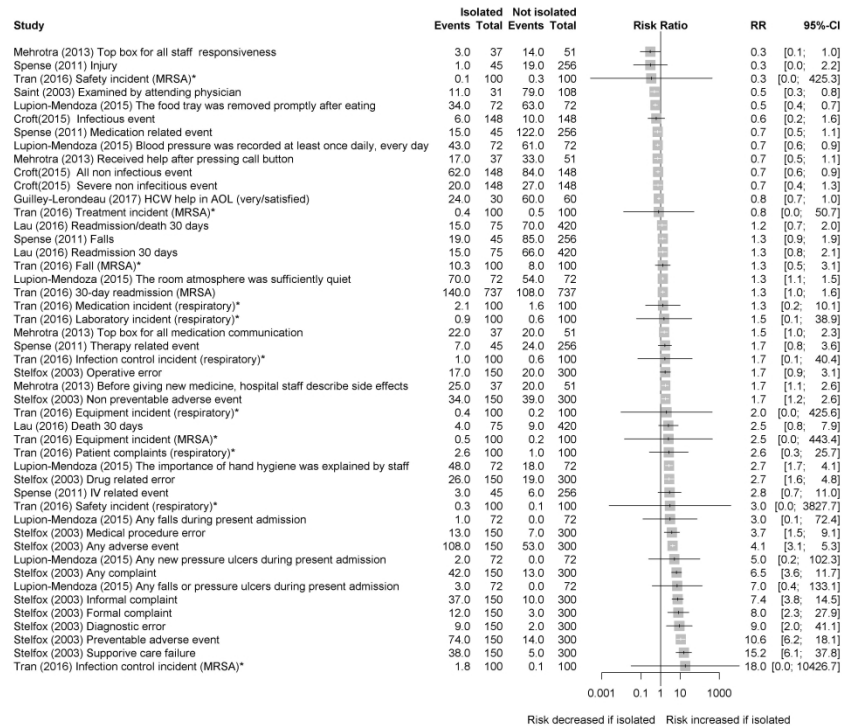

Figure 5. Risk ratio of non-psychological events in those isolated versus not isolated with a RR of  $\leq 0.8$  or  $\geq 1.2$

381x296mm (300 x 300 DPI)

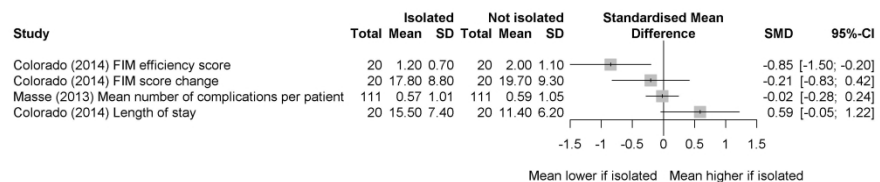

Figure 6. Standardised mean difference of non-psychological scores in those isolated versus those not isolated

321x127mm (300 x 300 DPI)



**Characteristics of studies**

| Reference            | Study type                                                                                                                                                                   | Isolated                                                                                                                                                          | Non isolated                                                                                                                                      |
|----------------------|------------------------------------------------------------------------------------------------------------------------------------------------------------------------------|-------------------------------------------------------------------------------------------------------------------------------------------------------------------|---------------------------------------------------------------------------------------------------------------------------------------------------|
| Colorado (2014)      | Retrospective matched case control study.<br>Rehabilitation facility- tertiary centre<br>United States<br>July 2009 to December 2010                                         | N20<br>Patients in contact isolation                                                                                                                              | N=20<br>Matched to patients not in contact isolation based on age, rehabilitation diagnosis, and type of insurance                                |
| Croft (2015)         | Prospective cohort<br>Medical or surgical inpatients admitted to non-intensive care unit hospital wards, United States.<br>January to November 2010.                         | N=148<br>Patients on contact precautions<br>Age: 52 (13.8)<br>% male: 53.4                                                                                        | N=148<br>Individually matched by after an initial 3-day length of stay to patients not on contact precautions.<br>Age 52.3 (14.6)<br>% male: 46.6 |
| Dashiell-Earp (2014) | Collected real-time data on the location of 15 internal medicine interns, United States.<br>October 1, 2012 to December 31, 2012                                             | 1156 encounters                                                                                                                                                   | 2467 encounters                                                                                                                                   |
| Day (2011)           | Patients admitted to the general acute care units, United States.<br>June 1, 2009 to October 30, 2009                                                                        | N=20<br>Age: 68.5 (14.7)<br>% male: 85.0                                                                                                                          | N=83<br>Age: 63.9 (12.6)<br>% male: 95.2                                                                                                          |
| Day (2011)           | A two-year retrospective cohort<br>Tertiary care, United States..<br>All general inpatients over 18 years hospitalized for >24 h<br>February 1, 2007 to January 31, 2009.    | Contact precautions private room when possible, can be cohorted<br>General N = 3138<br>Age: 51.2 (17.5) % male 58.9<br>ITU N=1694<br>Age: 54.9 (17.5) % male 61.0 | General N = 25 426<br>Age: 49.6 (19.0) % male 46.3%<br>ICU N = 5 854<br>Age: 56.0 (17.7)<br>% male 59.7                                           |
| Day (2012)           | 2-year retrospective cohort study of all non-psychiatric hospital admissions >18 years, United States.<br>February 1, 2007 to January 31, 2009                               | N = 9 684<br>Contact precautions as above<br>Mean age: 50.1 (18.8) % male 51.4                                                                                    | N = 50 458<br>Mean age: 52.3 (16.9)<br>% males 59.1                                                                                               |
| Day (2013)           | Longitudinal frequency-matched cohort study of patients admitted to general medical and surgical units, United States. Day 0, day 3 then weekly.<br>January to November 2010 | N = 148<br>Mean age: 52.0 (13.9)<br>% male 58.1                                                                                                                   | N = 148<br>Mean age: 52.3 (14.6)<br>% male 50.7                                                                                                   |

|                                              |                          |                                                                                                                                                                  |                                                                                                                   |                                                                                                                      |
|----------------------------------------------|--------------------------|------------------------------------------------------------------------------------------------------------------------------------------------------------------|-------------------------------------------------------------------------------------------------------------------|----------------------------------------------------------------------------------------------------------------------|
| 1<br>2<br>3<br>4<br>5                        | Evans (2003)             | Prospective observation; survey; retrospective review, United States. Tertiary care. June and July 2001                                                          | N 48<br>Mean age: 47.8 (2)<br>% male 85%                                                                          | N = 48<br>Mean age: 58.3 (2.4)<br>% male 75%                                                                         |
| 6<br>7<br>8<br>9<br>10                       | Findink (2012)           | Non-random quasi-experiment, Turkey<br>Age 18 to 65 Administered day 5<br>January 1, 2009 to December 31, 2009                                                   | N = 60<br>Mean age: 53.95 (18.4)<br>% male 75%                                                                    | N = 57<br>Mean age: 56.14 (17.1)<br>% male 76.3%                                                                     |
| 11<br>12<br>13<br>14<br>15<br>16<br>17       | Gammon (1998)            | Quasi experiment<br>Selected if last two numbers on their case notes even.<br>Two large District General Hospitals and one elderly care hospital, United Kingdom | N = 20<br>Placed in isolation for a minimum of 7days<br>Mean age: 61 years<br>% male: 65                          | N = 20<br>Mean age: 52 years<br>% male: 55                                                                           |
| 18<br>19<br>20<br>21<br>22<br>23             | Gandra (2014)            | Retrospective hospital-wide cohort study, United States. All patients admitted to medical-surgical inpatient units<br>November 1, 2009 to October 31, 2011       | Falls N=77<br>Mean age: 66.1 (14.3)<br>% male: 61%<br>Pressure ulcers N=82<br>Mean age: 64.5 (15.5)<br>% male: 63 | Falls N=82<br>Mean age: 63.7 (15.8)<br>% male: 51 (62%)<br>Pressure ulcers N=71<br>Mean age: 65.7 (15)<br>% male: 57 |
| 24<br>25<br>26<br>27<br>28                   | Guilley-Lerondeau (2017) | Matched cohort study with prospective inclusions<br>Interview 3 days after commencing<br>General sample. France<br>March to July 2012                            | N=30<br>First prescription of isolation precaution<br>Median age (range) 69 (32 to 91)<br>% male 47               | N=60<br>Median age (range) 64 (24 to 91)<br>% male 53                                                                |
| 29<br>30<br>31<br>32<br>33                   | Kennedy (1997)           | Cross-sectional matched-control study, United Kingdom.<br>May 1994 to November 1996                                                                              | N = 16<br>Isolated as a result of being MRSA<br>Mean age: 31.1<br>All male                                        | N = 16<br>Matched for age, sex, level of injury, and time since admission or injury                                  |
| 34<br>35                                     | Kirkland (1999)          | Observational study - 7 months<br>Medical intensive-care, United States                                                                                          | N=14                                                                                                              | N=21                                                                                                                 |
| 36<br>37<br>38<br>39                         | Lau (2016)               | Prospective cohort study.<br>Adult patients discharged from internal medicine wards, Canada<br>October 2013 to November 2014,                                    | N=75<br>Mean age 60.35 (17.83)<br>% male 59                                                                       | N=420<br>Mean age 63.31 (18.69)<br>% male 48%                                                                        |
| 40<br>41<br>42<br>43<br>44<br>45<br>46<br>47 | Livorsi (2015)           | Case-control study<br>Retrospective January 1, 2012 to                                                                                                           | N = 70<br>On contact precautions for MRSA throughout                                                              | N = 139<br>No significant differences between isolated and                                                           |

|                       |                                                                                                                                                      |                                                                                                                                                                                                    |                                                                                       |
|-----------------------|------------------------------------------------------------------------------------------------------------------------------------------------------|----------------------------------------------------------------------------------------------------------------------------------------------------------------------------------------------------|---------------------------------------------------------------------------------------|
|                       | May 31, 2012/prospective June 1, 2012 to March 31, 2013<br>'safety-net facility', United States                                                      | their hospital stay. Found to be MRSA positive during a previous hospitalization or as an outpatient, not current case                                                                             | non-isolated patients                                                                 |
| Lupi3n-Mendoza (2015) | Matched case-control study<br>Tertiary hospital, Spain<br>2011 and 2012                                                                              | N = 72<br>Adult patients admitted in isolation for =>5 days.<br>Median age (range) 62 (21-93)<br>% male 73%                                                                                        | N = 72<br>Median age (range) 69 (23-89),<br>% male 68.1%                              |
| Massee (2013)         | Retrospective case-control<br>Tertiary care, Canada                                                                                                  | N = 111<br>Matched MRSA patients with an admission diagnosis of heart failure or COPD to similar non-isolated controls<br>Median age (IQR) 80.0 (69.0-86.0)<br>% male 60.4%                        | N = 111<br>Median age (IQR) 80.0 (68.0-86.0)<br>% male 60.4%                          |
| Mehrotra (2013)       | Prospective cohort<br>Admission and on days 3, 7, 14<br>Tertiary centre, United States                                                               | N = 238<br>Segregation into a private or cohorted room<br>Mean age (SD) 52.4 (13.4)<br>% male 55.7                                                                                                 | N = 290<br>Mean age (SD) 52.9 (14.8)<br>% male 48                                     |
| Saint (2003)          | Prospective cohort study<br>2 university-affiliated medical centers, United States.<br>October 1999 to March 2000                                    | N=31                                                                                                                                                                                               | N=108                                                                                 |
| Soon (2013)           | Cross-sectional survey of cases and matched controls<br>Teaching hospital Singapore<br>June and August 2011                                          | N=20<br>Contact isolation in a cohort cubicle for the first time because of colonization or infection with a MDRO for at least 3 days<br>No statistically significant differences in age or gender | N=20                                                                                  |
| Spense (2011)         | Retrospective evaluation of incident reports<br>All patients admitted to acute care facility, United States<br>January 1, 2008 to December 31, 2008. | N=45                                                                                                                                                                                               | N=256                                                                                 |
| Stelfox (2003)        | Case control study<br>Consecutive adults isolated for at least 2 days with MRSA. Canada and United States<br>Controls patients admitted before       | General N = 78<br>Age: 69.6 (17.1)<br>% male: 45%<br>CHF N = 72<br>Age: 66.9 (14.7)                                                                                                                | General N = 156<br>Age: 65.4 (18.2)<br>% male: 51%<br>CHF N = 144<br>Age: 66.0 (14.5) |

|                   |                                                                                                                              |                                                                                                                     |                                                                         |
|-------------------|------------------------------------------------------------------------------------------------------------------------------|---------------------------------------------------------------------------------------------------------------------|-------------------------------------------------------------------------|
|                   | and after.<br>January 1, 1999, to January 1, 2000                                                                            | % male: 58                                                                                                          | % male: 54                                                              |
| Tarzi (2001)      | Cross-sectional matched case-control study<br>Care of the elderly rehabilitation wards, UK                                   | N = 22<br>Had been in isolation for at least two weeks with MRSA<br>Mean age (SD) 80 (8.4)<br>% male 27.3           | N = 20<br>Mean age (SD) 81 (9.1)<br>% male 33.3                         |
| Tran (2017)       | Propensity matched cohort study.<br>General internal medicine services, 3 hospitals, Canada<br>January 2010 to December 2012 | MRSA<br>Age: 69<br>% male 57%<br>Respiratory<br>Age: 71.7<br>% male: 53<br>Isolated for MRSA or respiratory illness | MRSA<br>Age: 69<br>% male 58%<br>Respiratory<br>Age: 70.6<br>% male: 55 |
| Wassenburg (2010) | Cross-sectional matched cohort study<br>Single university hospital,<br>Netherlands<br>November 2006 to February 2007         | N = 42<br>Age: 52 (19)<br>% male: 52                                                                                | N = 84<br>Age: 55 (16)<br>% male: 55                                    |

1  
2  
3  
4  
5  
6  
7  
8  
9  
10  
11  
12  
13  
14  
15  
16  
17  
18  
19  
20  
21  
22  
23  
24  
25  
26  
27  
28  
29  
30  
31  
32  
33  
34  
35  
36  
37  
38  
39  
40  
41  
42  
43  
44  
45  
46  
47

Excluded papers

| Reference             | Reason for exclusion         |
|-----------------------|------------------------------|
| Chittick et al (2016) | No comparative data          |
| Godsell (2013)        | Focussed on HCP              |
| Jeong (2016)          | MERS                         |
| MacKellaig (1986)     | Qualitative                  |
| Madsden (2015)        | Qualitative                  |
| Maunder (2003)        | SARS                         |
| Moran (2009)          | Focus on family centred care |
| Morgan (2011)         | Focus on process measures    |
| Rees (2000a)          | No comparative data          |
| Rees (2000a)          | No comparative data          |
| Simon (2016)          | Before and after             |
| Wilkins (1988)        | No comparative data          |

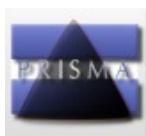

# PRISMA 2009 Flow Diagram

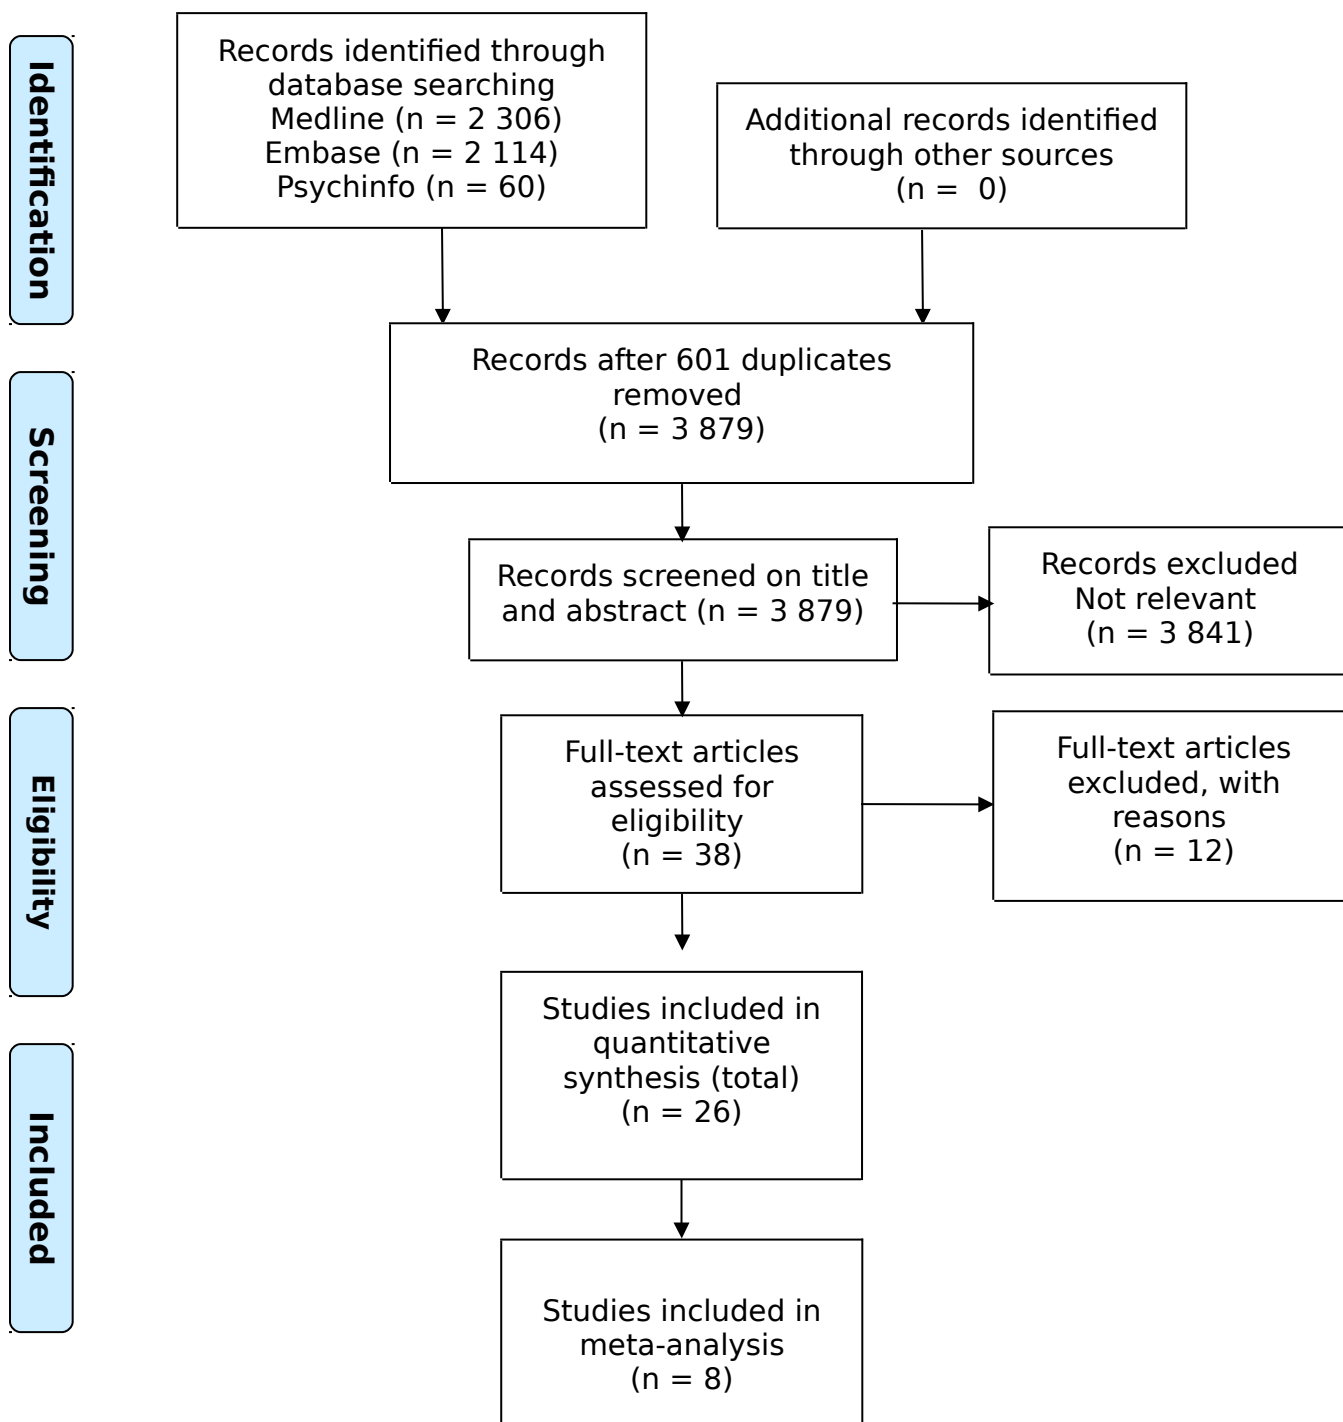

From: Moher D, Liberati A, Tetzlaff J, Altman DG, The PRISMA Group (2009). Preferred Reporting Items for Systematic Reviews and Meta-Analyses: The PRISMA Statement. PLoS Med 6(7): e1000097. doi:10.1371/journal.pmed1000097

For more information, visit [www.prisma-statement.org](http://www.prisma-statement.org).

For peer review only - <http://bmjopen.bmj.com/site/about/guidelines.xhtml>

## All RR data

|    | Reference                   | Year |
|----|-----------------------------|------|
| 1  |                             |      |
| 2  |                             |      |
| 3  |                             |      |
| 4  | 1 Croft(2015)               | 2015 |
| 5  | 2 Croft(2015)               | 2015 |
| 6  | 4 Croft(2015)               | 2015 |
| 7  |                             |      |
| 8  | 9 Guilley-Lerondeau (2017)  | 2017 |
| 9  | 15 Lau (2016)               | 2016 |
| 10 | 16 Lau (2016)               | 2016 |
| 11 | 18 Lau (2016)               | 2016 |
| 12 | 43 Lupion-Mendoza (2015)    | 2015 |
| 13 | 48 Lupion-Mendoza (2015)    | 2015 |
| 14 | 50 Lupion-Mendoza (2015)    | 2015 |
| 15 | 54 Lupion-Mendoza (2015)    | 2015 |
| 16 | 57 Lupion-Mendoza (2015)    | 2015 |
| 17 | 58 Lupion-Mendoza (2015)    | 2015 |
| 18 | 59 Lupion-Mendoza (2015)    | 2015 |
| 19 | 69 Mehrotra (2013)          | 2013 |
| 20 | 71 Mehrotra (2013)          | 2013 |
| 21 | 76 Mehrotra (2013)          | 2013 |
| 22 | 77 Mehrotra (2013)          | 2013 |
| 23 | 85 Stelfox (2003)           | 2003 |
| 24 | 86 Stelfox (2003)           | 2003 |
| 25 | 87 Stelfox (2003)           | 2003 |
| 26 | 88 Stelfox (2003)           | 2003 |
| 27 | 89 Stelfox (2003)           | 2003 |
| 28 | 90 Stelfox (2003)           | 2003 |
| 29 | 91 Stelfox (2003)           | 2003 |
| 30 | 92 Stelfox (2003)           | 2003 |
| 31 | 93 Stelfox (2003)           | 2003 |
| 32 | 94 Stelfox (2003)           | 2003 |
| 33 | 95 Stelfox (2003)           | 2003 |
| 34 | 96 Spense (2011)            | 2011 |
| 35 | 97 Spense (2011)            | 2011 |
| 36 | 98 Spense (2011)            | 2011 |
| 37 | 99 Spense (2011)            | 2011 |
| 38 | 100 Spense (2011)           | 2011 |
| 39 | 102 Saint (2003)            | 2003 |
| 40 | 103 Tran (2016)             | 2016 |
| 41 | 106 Tran (2016)             | 2016 |
| 42 | 107 Tran (2016)             | 2016 |
| 43 | 108 Tran (2016)             | 2016 |
| 44 | 109 Tran (2016)             | 2016 |
| 45 | 113 Tran (2016)             | 2016 |
| 46 | 114 Tran (2016)             | 2016 |
| 47 | 116 Tran (2016)             | 2016 |
| 48 | 117 Tran (2016)             | 2016 |
| 49 | 118 Tran (2016)             | 2016 |
| 50 | 120 Tran (2016)             | 2016 |
| 51 | 122 Tran (2016)             | 2016 |
| 52 |                             |      |
| 53 | 3 Croft(2015)               | 2015 |
| 54 | 5 Evans (2003)              | 2003 |
| 55 | 6 Evans (2003)              | 2003 |
| 56 | 7 Evans (2003)              | 2003 |
| 57 | 8 Guilley-Lerondeau (2017)  | 2017 |
| 58 | 10 Guilley-Lerondeau (2017) | 2017 |
| 59 | 11 Guilley-Lerondeau (2017) | 2017 |
| 60 |                             |      |

## All RR data

|    |                          |      |
|----|--------------------------|------|
| 12 | Guilley-Lerondeau (2017) | 2017 |
| 13 | Guilley-Lerondeau (2017) | 2017 |
| 14 | Guilley-Lerondeau (2017) | 2017 |
| 17 | Lau (2016)               | 2016 |
| 19 | Livorsi (2015)           | 2015 |
| 20 | Livorsi (2015)           | 2015 |
| 21 | Livorsi (2015)           | 2015 |
| 22 | Livorsi (2015)           | 2015 |
| 23 | Livorsi (2015)           | 2015 |
| 24 | Livorsi (2015)           | 2015 |
| 25 | Livorsi (2015)           | 2015 |
| 26 | Livorsi (2015)           | 2015 |
| 27 | Livorsi (2015)           | 2015 |
| 28 | Livorsi (2015)           | 2015 |
| 29 | Livorsi (2015)           | 2015 |
| 30 | Livorsi (2015)           | 2015 |
| 31 | Livorsi (2015)           | 2015 |
| 32 | Livorsi (2015)           | 2015 |
| 33 | Livorsi (2015)           | 2015 |
| 34 | Livorsi (2015)           | 2015 |
| 35 | Livorsi (2015)           | 2015 |
| 36 | Livorsi (2015)           | 2015 |
| 37 | Lupion-Mendoza (2015)    | 2015 |
| 38 | Lupion-Mendoza (2015)    | 2015 |
| 39 | Lupion-Mendoza (2015)    | 2015 |
| 40 | Lupion-Mendoza (2015)    | 2015 |
| 41 | Lupion-Mendoza (2015)    | 2015 |
| 42 | Lupion-Mendoza (2015)    | 2015 |
| 44 | Lupion-Mendoza (2015)    | 2015 |
| 45 | Lupion-Mendoza (2015)    | 2015 |
| 46 | Lupion-Mendoza (2015)    | 2015 |
| 47 | Lupion-Mendoza (2015)    | 2015 |
| 49 | Lupion-Mendoza (2015)    | 2015 |
| 51 | Lupion-Mendoza (2015)    | 2015 |
| 52 | Lupion-Mendoza (2015)    | 2015 |
| 53 | Lupion-Mendoza (2015)    | 2015 |
| 55 | Lupion-Mendoza (2015)    | 2015 |
| 56 | Lupion-Mendoza (2015)    | 2015 |
| 60 | Masse (2013)             | 2013 |
| 61 | Mehrotra (2013)          | 2013 |
| 62 | Mehrotra (2013)          | 2013 |
| 63 | Mehrotra (2013)          | 2013 |
| 64 | Mehrotra (2013)          | 2013 |
| 65 | Mehrotra (2013)          | 2013 |
| 66 | Mehrotra (2013)          | 2013 |
| 67 | Mehrotra (2013)          | 2013 |
| 68 | Mehrotra (2013)          | 2013 |
| 70 | Mehrotra (2013)          | 2013 |
| 72 | Mehrotra (2013)          | 2013 |
| 73 | Mehrotra (2013)          | 2013 |
| 74 | Mehrotra (2013)          | 2013 |
| 75 | Mehrotra (2013)          | 2013 |
| 78 | Mehrotra (2013)          | 2013 |
| 79 | Mehrotra (2013)          | 2013 |
| 80 | Mehrotra (2013)          | 2013 |



All RR data

|    |                    |      |
|----|--------------------|------|
| 1  |                    |      |
| 2  |                    |      |
| 3  |                    |      |
| 4  | 81 Mehrotra (2013) | 2013 |
| 5  | 82 Mehrotra (2013) | 2013 |
| 6  | 83 Mehrotra (2013) | 2013 |
| 7  | 84 Mehrotra (2013) | 2013 |
| 8  | 101 Saint (2003)   | 2003 |
| 9  | 104 Tran (2016)    | 2016 |
| 10 | 105 Tran (2016)    | 2016 |
| 11 | 110 Tran (2016)    | 2016 |
| 12 | 111 Tran (2016)    | 2016 |
| 13 | 112 Tran (2016)    | 2016 |
| 14 | 115 Tran (2016)    | 2016 |
| 15 | 119 Tran (2016)    | 2016 |
| 16 | 121 Tran (2016)    | 2016 |
| 17 | 123 Tran (2016)    | 2016 |
| 18 | 124 Tran (2016)    | 2016 |
| 19 | 125 Tran (2016)    | 2016 |
| 20 | 126 Tran (2016)    | 2016 |
| 21 | 127 Tran (2016)    | 2016 |
| 22 | 128 Tran (2016)    | 2016 |
| 23 |                    |      |
| 24 |                    |      |
| 25 |                    |      |
| 26 |                    |      |
| 27 |                    |      |
| 28 |                    |      |
| 29 |                    |      |
| 30 |                    |      |
| 31 |                    |      |
| 32 |                    |      |
| 33 |                    |      |
| 34 |                    |      |
| 35 |                    |      |
| 36 |                    |      |
| 37 |                    |      |
| 38 |                    |      |
| 39 |                    |      |
| 40 |                    |      |
| 41 |                    |      |
| 42 |                    |      |
| 43 |                    |      |
| 44 |                    |      |
| 45 |                    |      |
| 46 |                    |      |
| 47 |                    |      |
| 48 |                    |      |
| 49 |                    |      |
| 50 |                    |      |
| 51 |                    |      |
| 52 |                    |      |
| 53 |                    |      |
| 54 |                    |      |
| 55 |                    |      |
| 56 |                    |      |
| 57 |                    |      |
| 58 |                    |      |
| 59 |                    |      |
| 60 |                    |      |

For peer review only

## All RR data

| Outcome                                                          | Isolated |
|------------------------------------------------------------------|----------|
| All non infectious event                                         | 62       |
| Severe non infectitious event                                    | 20       |
| Infectious event                                                 | 6        |
| HCW help in AOL (very/satisfied)                                 | 24       |
| Readmission/death 30 days                                        | 15       |
| Readmission 30 days                                              | 15       |
| Death 30 days                                                    | 4        |
| The importance of hand hygiene was explained by staff            | 48       |
| The food tray was removed promptly after eating                  | 34       |
| The room atmosphere was sufficiently quiet                       | 70       |
| Blood pressure was recorded at least once daily, every day       | 43       |
| Any falls during present admission                               | 1        |
| Any new pressure ulcers during present admission                 | 2        |
| Any falls or pressure ulcers during present admission            | 3        |
| Received help after pressing call button                         | 17       |
| Top box for all staff responsiveness                             | 3        |
| Before giving new medicine, hospital staff describe side effects | 25       |
| Top box for all medication communication                         | 22       |
| Any complaint                                                    | 42       |
| Informal complaint                                               | 37       |
| Formal complaint                                                 | 12       |
| Any adverse event                                                | 108      |
| Non preventable adverse event                                    | 34       |
| Preventable adverse event                                        | 74       |
| Supportive care failure                                          | 38       |
| Diagnostic error                                                 | 9        |
| Operative error                                                  | 17       |
| Medical procedure error                                          | 13       |
| Drug related error                                               | 26       |
| Falls                                                            | 19       |
| Injury                                                           | 1        |
| IV related event                                                 | 3        |
| Medication related event                                         | 15       |
| Therapy related event                                            | 7        |
| Examined by attending physician                                  | 11       |
| Fall (MRSA)*                                                     | 10.3     |
| Treatment incident (MRSA)*                                       | 0.4      |
| Infection control incident (MRSA)*                               | 1.8      |
| Safety incident (MRSA)*                                          | 0.1      |
| Equipment incident (MRSA)*                                       | 0.5      |
| Medication incident (respiratory)*                               | 2.1      |
| Laboratory incident (respiratory)*                               | 0.9      |
| Infection control incident (respiratory)*                        | 1        |
| Safety incident (respiratory)*                                   | 0.3      |
| Equipment incident (respiratory)*                                | 0.4      |
| Patient complaints (respiratory)*                                | 2.6      |
| 30-day readmission (MRSA)                                        | 140      |
| Preventable non infectiouts event                                | 37       |
| Encounters per hr (no)                                           | 5        |
| ICU encounters per hr                                            | 6        |
| Floor encounters per hr                                          | 4        |
| Global hygiene (very/satisfied)                                  | 28       |
| Daily room cleaning (very/satisfied)                             | 27       |
| HCW availability (very/satisfied)                                | 25       |

|    |  |  |
|----|--|--|
| 1  |  |  |
| 2  |  |  |
| 3  |  |  |
| 4  |  |  |
| 5  |  |  |
| 6  |  |  |
| 7  |  |  |
| 8  |  |  |
| 9  |  |  |
| 10 |  |  |
| 11 |  |  |
| 12 |  |  |
| 13 |  |  |
| 14 |  |  |
| 15 |  |  |
| 16 |  |  |
| 17 |  |  |
| 18 |  |  |
| 19 |  |  |
| 20 |  |  |
| 21 |  |  |
| 22 |  |  |
| 23 |  |  |
| 24 |  |  |
| 25 |  |  |
| 26 |  |  |
| 27 |  |  |
| 28 |  |  |
| 29 |  |  |
| 30 |  |  |
| 31 |  |  |
| 32 |  |  |
| 33 |  |  |
| 34 |  |  |
| 35 |  |  |
| 36 |  |  |
| 37 |  |  |
| 38 |  |  |
| 39 |  |  |
| 40 |  |  |
| 41 |  |  |
| 42 |  |  |
| 43 |  |  |
| 44 |  |  |
| 45 |  |  |
| 46 |  |  |
| 47 |  |  |
| 48 |  |  |
| 49 |  |  |
| 50 |  |  |
| 51 |  |  |
| 52 |  |  |
| 53 |  |  |
| 54 |  |  |
| 55 |  |  |
| 56 |  |  |
| 57 |  |  |
| 58 |  |  |
| 59 |  |  |
| 60 |  |  |

## All RR data

|                                                                                        |    |
|----------------------------------------------------------------------------------------|----|
| Daily HCW presence (very/satisfied)                                                    | 27 |
| Human relation with HCW (very/satisfied)                                               | 27 |
| Global satisfaction (very/satisfied)                                                   | 25 |
| ED visit 30 days                                                                       | 22 |
| Overall rating of hospital =>9/10                                                      | 44 |
| Nurses treat you with courtesy and respect                                             | 51 |
| Nurses listen carefully                                                                | 47 |
| Nurses explain things in an understandable way                                         | 47 |
| Received help after pressing call button                                               | 28 |
| Doctors treat you with courtesy and respect                                            | 53 |
| Doctors listen carefully to you                                                        | 48 |
| Doctors explain things in an understandable way                                        | 50 |
| Room and bathroom kept clean                                                           | 42 |
| Room quiet at night                                                                    | 51 |
| Received help with bathroom/bedpan                                                     | 19 |
| Pain well controlled                                                                   | 34 |
| Hospital staff help with pain                                                          | 45 |
| Hospital staff explain new medications                                                 | 20 |
| Hospital staff describe side effects of medications                                    | 13 |
| Hospital staff discussed help after discharge                                          | 52 |
| Written information on problems to look for after discharge                            | 52 |
| Recommend hospital to friends and family                                               | 43 |
| Overall satisfaction with the professional treatment received from health care workers | 67 |
| Nurses treated the patients in polite and respectful manner (totally/partially agree)  | 70 |
| Physicians treated the patients in polite and respectful manner                        | 71 |
| Nurses provided clear information about the health problem                             | 64 |
| Physicians provided clear information about the health problem                         | 66 |
| Clear explanations were provided before all procedures                                 | 62 |
| Health care workers entered the room whenever the patient called them                  | 66 |
| Blood pressure and temperature recorded at least once a day                            | 65 |
| The physician visited daily                                                            | 69 |
| The room was comfortable                                                               | 62 |
| Room cleaning was satisfactory                                                         | 66 |
| I frequently felt lonely during admission                                              | 17 |
| Medical notes were recorded every day                                                  | 64 |
| Nurses notes were recorded every day                                                   | 64 |
| Daily temperature was recorded at least once a day, every day                          | 53 |
| Daily glycemc levels were recorded as indicated, everyday (only diabetic patients)     | 31 |
| Total number of complications                                                          | 60 |
| Nurses treat with courtesy and respect                                                 | 31 |
| Nurses listen carefully                                                                | 30 |
| Nurses explain things in understandable way                                            | 30 |
| Top box for all nursing communication                                                  | 27 |
| Doctors treat with courtesy and respect                                                | 33 |
| Doctors listen carefully                                                               | 31 |
| Doctors explain things in understandable way                                           | 29 |
| Top box for all doctor communication                                                   | 27 |
| Received help in bathroom/bedpan use                                                   | 25 |
| Pain well controlled                                                                   | 26 |
| Hospital staff help with pain                                                          | 26 |
| Top box for all pain management                                                        | 25 |
| Before giving new medicine, hospital staff tells what it is for                        | 30 |
| Spoken with about having necessary help after discharge                                | 31 |
| Written information on symptoms/problems to look for after discharge                   | 33 |
| Top box for all discharge information                                                  | 30 |

## All RR data

|    |                                                    |      |
|----|----------------------------------------------------|------|
| 1  |                                                    |      |
| 2  |                                                    |      |
| 3  |                                                    |      |
| 4  | Hospital room and bathroom kept clean (individual) | 27   |
| 5  | Area near room quiet at night (individual)         | 24   |
| 6  | Recommend hospital to friends and family (global)  | 25   |
| 7  | Overall hospital rating (global)                   | 22   |
| 8  | Examined by senior resident doctor                 | 26   |
| 9  | Medication incident (MRSA)*                        | 2.2  |
| 10 | Laboratory incident (MRSA)*                        | 0.3  |
| 11 | Any adverse event (MRSA)*                          | 12.4 |
| 12 | Patient complaints (MRSA)*                         | 1.1  |
| 13 | Fall (respiratory)*                                | 4.2  |
| 14 | Treatment incident (respiratory)*                  | 0.6  |
| 15 | Any adverse event (respiratory)*                   | 9.1  |
| 16 | Inpatient mortality (MRSA)                         | 59   |
| 17 | 30-day ED visit (MRSA)                             | 84   |
| 18 | Readmission or ED visit (respiratory)              | 167  |
| 19 | Inpatient mortality (respiratory)                  | 104  |
| 20 | 30-day readmission (respiratory)                   | 206  |
| 21 | 30-day ED visit (respiratory)                      | 164  |
| 22 | Readmission or ED visit (respiratory)              | 261  |
| 23 |                                                    |      |
| 24 |                                                    |      |
| 25 |                                                    |      |
| 26 |                                                    |      |
| 27 |                                                    |      |
| 28 |                                                    |      |
| 29 |                                                    |      |
| 30 |                                                    |      |
| 31 |                                                    |      |
| 32 |                                                    |      |
| 33 |                                                    |      |
| 34 |                                                    |      |
| 35 |                                                    |      |
| 36 |                                                    |      |
| 37 |                                                    |      |
| 38 |                                                    |      |
| 39 |                                                    |      |
| 40 |                                                    |      |
| 41 |                                                    |      |
| 42 |                                                    |      |
| 43 |                                                    |      |
| 44 |                                                    |      |
| 45 |                                                    |      |
| 46 |                                                    |      |
| 47 |                                                    |      |
| 48 |                                                    |      |
| 49 |                                                    |      |
| 50 |                                                    |      |
| 51 |                                                    |      |
| 52 |                                                    |      |
| 53 |                                                    |      |
| 54 |                                                    |      |
| 55 |                                                    |      |
| 56 |                                                    |      |
| 57 |                                                    |      |
| 58 |                                                    |      |
| 59 |                                                    |      |
| 60 |                                                    |      |

## All RR data

|    | Isolated.N | Control | Control.N | RI          | RC          | RR          | inout | Type         |
|----|------------|---------|-----------|-------------|-------------|-------------|-------|--------------|
| 1  |            |         |           |             |             |             |       |              |
| 2  |            |         |           |             |             |             |       |              |
| 3  |            |         |           |             |             |             |       |              |
| 4  | 148        | 84      | 148       | 0.418918919 | 0.567567568 | 0.738095238 | a     | AE           |
| 5  | 148        | 27      | 148       | 0.135135135 | 0.182432432 | 0.740740741 | a     | AE           |
| 6  | 148        | 10      | 148       | 0.040540541 | 0.067567568 | 0.6         | a     | AE           |
| 7  | 30         | 60      | 60        | 0.8         | 1           | 1.25        | a     | Satisfaction |
| 8  | 75         | 70      | 420       | 0.2         | 0.166666667 | 1.2         | a     | AE           |
| 9  | 75         | 66      | 420       | 0.2         | 0.157142857 | 1.272727273 | a     | AE           |
| 10 | 75         | 9       | 420       | 0.053333333 | 0.021428571 | 2.488888889 | a     | AE           |
| 11 | 72         | 18      | 72        | 0.666666667 | 0.25        | 0.375       | a     | Satisfaction |
| 12 | 72         | 63      | 72        | 0.472222222 | 0.875       | 1.852941177 | a     | Satisfaction |
| 13 | 72         | 54      | 72        | 0.972222222 | 0.75        | 0.771428572 | a     | Satisfaction |
| 14 | 72         | 61      | 72        | 0.597222222 | 0.847222222 | 0.704918033 | a     | Quality      |
| 15 | 72         | 0       | 72        | 0.013888889 | 0           | #DIV/0!     | a     | AE           |
| 16 | 72         | 0       | 72        | 0.027777778 | 0           | #DIV/0!     | a     | AE           |
| 17 | 72         | 0       | 72        | 0.041666667 | 0           | #DIV/0!     | a     | AE           |
| 18 | 37         | 33      | 51        | 0.459459459 | 0.647058824 | 1.408304501 | a     | Quality      |
| 19 | 37         | 14      | 51        | 0.081081081 | 0.274509804 | 3.385620919 | a     | Satisfaction |
| 20 | 37         | 20      | 51        | 0.675675676 | 0.392156863 | 0.580392157 | a     | Quality      |
| 21 | 37         | 20      | 51        | 0.594594595 | 0.392156863 | 0.659536542 | a     | Quality      |
| 22 | 150        | 13      | 300       | 0.28        | 0.043333333 | 6.461538462 | a     | Satisfaction |
| 23 | 150        | 10      | 300       | 0.246666667 | 0.033333333 | 7.4         | a     | Satisfaction |
| 24 | 150        | 3       | 300       | 0.08        | 0.01        | 8           | a     | Satisfaction |
| 25 | 150        | 53      | 300       | 0.72        | 0.176666667 | 4.075471698 | a     | Satisfaction |
| 26 | 150        | 39      | 300       | 0.226666667 | 0.13        | 1.743589744 | a     | AE           |
| 27 | 150        | 14      | 300       | 0.493333333 | 0.046666667 | 10.57142857 | a     | AE           |
| 28 | 150        | 5       | 300       | 0.253333333 | 0.016666667 | 15.2        | a     | AE           |
| 29 | 150        | 2       | 300       | 0.06        | 0.006666667 | 9           | a     | AE           |
| 30 | 150        | 20      | 300       | 0.113333333 | 0.066666667 | 1.7         | a     | AE           |
| 31 | 150        | 7       | 300       | 0.086666667 | 0.023333333 | 3.714285714 | a     | AE           |
| 32 | 150        | 19      | 300       | 0.173333333 | 0.063333333 | 2.736842105 | a     | AE           |
| 33 | 45         | 85      | 256       | 0.422222222 | 0.33203125  | 1.271633987 | a     | AE           |
| 34 | 45         | 19      | 256       | 0.022222222 | 0.07421875  | 0.299415205 | a     | AE           |
| 35 | 45         | 6       | 256       | 0.066666667 | 0.0234375   | 2.844444444 | a     | AE           |
| 36 | 45         | 122     | 256       | 0.333333333 | 0.4765625   | 0.699453552 | a     | AE           |
| 37 | 45         | 24      | 256       | 0.155555556 | 0.09375     | 1.659259259 | a     | AE           |
| 38 | 31         | 79      | 108       | 0.35483871  | 0.731481481 | 2.061447808 | a     | Quality      |
| 39 | 100        | 8       | 100       | 0.103       | 0.08        | 1.2875      | a     | AE           |
| 40 | 100        | 0.5     | 100       | 0.004       | 0.005       | 0.8         | a     | AE           |
| 41 | 100        | 0.1     | 100       | 0.018       | 0.0011      | 16.36363636 | a     | AE           |
| 42 | 100        | 0.3     | 100       | 0.001       | 0.003       | 0.333333333 | a     | AE           |
| 43 | 100        | 0.2     | 100       | 0.005       | 0.002       | 2.5         | a     | AE           |
| 44 | 100        | 1.6     | 100       | 0.021       | 0.016       | 1.3125      | a     | AE           |
| 45 | 100        | 0.6     | 100       | 0.009       | 0.006       | 1.5         | a     | AE           |
| 46 | 100        | 0.6     | 100       | 0.01        | 0.006       | 1.666666667 | a     | AE           |
| 47 | 100        | 0.1     | 100       | 0.003       | 0.001       | 3           | a     | AE           |
| 48 | 100        | 0.2     | 100       | 0.004       | 0.002       | 2           | a     | AE           |
| 49 | 100        | 1       | 100       | 0.026       | 0.01        | 2.6         | a     | Satisfaction |
| 50 | 737        | 108     | 737       | 0.19        | 0.147       | 1.292517007 | a     | AE           |
| 51 | 148        | 41      | 148       | 0.25        | 0.277027027 | 0.902439024 | b     | AE           |
| 52 | 485        | 11      | 1002      | 0.010309278 | 0.010978044 | 1.064870304 | b     | Quality      |
| 53 | 319        | 14      | 658       | 0.018808777 | 0.021276596 | 1.131205713 | b     | Quality      |
| 54 | 166        | 8       | 344       | 0.024096386 | 0.023255814 | 0.965116263 | b     | Quality      |
| 55 | 30         | 59      | 60        | 0.933333333 | 0.983333333 | 1.053571429 | b     | Satisfaction |
| 56 | 30         | 58      | 60        | 0.9         | 0.966666667 | 1.074074074 | b     | Satisfaction |
| 57 | 30         | 57      | 60        | 0.833333333 | 0.95        | 1.14        | b     | Satisfaction |
| 58 |            |         |           |             |             |             |       |              |
| 59 |            |         |           |             |             |             |       |              |



1  
2  
3  
4  
5  
6  
7  
8  
9  
10  
11  
12  
13  
14  
15  
16  
17  
18  
19  
20  
21  
22  
23  
24  
25  
26  
27  
28  
29  
30  
31  
32  
33  
34  
35  
36  
37  
38  
39  
40  
41  
42  
43  
44  
45  
46  
47  
48  
49  
50  
51  
52  
53  
54  
55  
56  
57  
58  
59  
60

## All RR data

|      |      |      |             |             |             |   |              |
|------|------|------|-------------|-------------|-------------|---|--------------|
| 37   | 37   | 51   | 0.72972973  | 0.725490196 | 0.994190268 | b | Quality      |
| 37   | 32   | 51   | 0.648648649 | 0.62745098  | 0.96732026  | b | Satisfaction |
| 37   | 41   | 51   | 0.675675676 | 0.803921569 | 1.189803922 | b | Satisfaction |
| 37   | 36   | 51   | 0.594594595 | 0.705882353 | 1.187165775 | b | Satisfaction |
| 31   | 94   | 108  | 0.838709677 | 0.87037037  | 1.037749288 | b | Quality      |
| 100  | 2.4  | 100  | 0.022       | 0.024       | 0.916666667 | b | AE           |
| 100  | 0.3  | 100  | 0.0027      | 0.0033      | 0.818181818 | b | AE           |
| 100  | 10.7 | 100  | 0.124       | 0.107       | 1.158878505 | b | AE           |
| 100  | 1.3  | 100  | 0.0109      | 0.0125      | 0.872       | b | Satisfaction |
| 100  | 5.1  | 100  | 0.042       | 0.051       | 0.823529412 | b | AE           |
| 100  | 0.7  | 100  | 0.006       | 0.007       | 0.857142857 | b | AE           |
| 100  | 8.9  | 100  | 0.091       | 0.089       | 1.02247191  | b | AE           |
| 737  | 52   | 737  | 0.08        | 0.07        | 1.142857143 | b | AE           |
| 737  | 86   | 737  | 0.114       | 0.117       | 0.974358974 | b | AE           |
| 737  | 142  | 737  | 0.227       | 0.193       | 1.176165803 | b | AE           |
| 1502 | 128  | 1502 | 0.069       | 0.085       | 0.811764706 | b | AE           |
| 1502 | 236  | 1502 | 0.137       | 0.157       | 0.872611465 | b | AE           |
| 1502 | 168  | 1502 | 0.109       | 0.112       | 0.973214286 | b | AE           |
| 1502 | 278  | 1502 | 0.174       | 0.185       | 0.940540541 | b | AE           |



## All RR data

|    | Good/bad | exp yi | yi    | vi           |             |
|----|----------|--------|-------|--------------|-------------|
| 1  |          |        |       |              |             |
| 2  |          |        |       |              |             |
| 3  |          |        |       |              |             |
| 4  | Good/bad | exp yi | yi    | vi           |             |
| 5  | Bad      |        | 0.74  | -0.303682414 | 0.014520281 |
| 6  | Bad      |        | 0.74  | -0.300104592 | 0.073523524 |
| 7  | Bad      |        | 0.60  | -0.510825624 | 0.253153153 |
| 8  | Good     |        | 0.80  | -0.227083588 | 0.008693745 |
| 9  | Bad      |        | 1.20  | 0.182321557  | 0.065238095 |
| 10 | Bad      |        | 1.27  | 0.241162057  | 0.066103896 |
| 11 | Bad      |        | 2.49  | 0.911836382  | 0.345396825 |
| 12 | Good     |        | 2.67  | 0.980829253  | 0.048611111 |
| 13 | Good     |        | 0.54  | -0.616774202 | 0.017507003 |
| 14 | Good     |        | 1.30  | 0.259511195  | 0.005026455 |
| 15 | Good     |        | 0.70  | -0.349673748 | 0.011871479 |
| 16 | Bad      |        | 3.00  | 1.098612289  | 2.639269406 |
| 17 | Bad      |        | 5.00  | 1.609437912  | 2.37260274  |
| 18 | Bad      |        | 7.00  | 1.945910149  | 2.258317025 |
| 19 | Good     |        | 0.71  | -0.342386497 | 0.04249169  |
| 20 | Good     |        | 0.30  | -1.219537321 | 0.358127035 |
| 21 | Good     |        | 1.72  | 0.544051271  | 0.04336513  |
| 22 | Good     |        | 1.52  | 0.4162179    | 0.048819675 |
| 23 | Bad      |        | 6.46  | 1.865867441  | 0.090732601 |
| 24 | Bad      |        | 7.40  | 2.00148      | 0.117027027 |
| 25 | Bad      |        | 8.00  | 2.079441542  | 0.406666667 |
| 26 | Bad      |        | 4.08  | 1.404986494  | 0.018127184 |
| 27 | Bad      |        | 1.74  | 0.555946059  | 0.04505279  |
| 28 | Bad      |        | 10.57 | 2.358154944  | 0.074942085 |
| 29 | Bad      |        | 15.20 | 2.721295428  | 0.216315789 |
| 30 | Bad      |        | 9.00  | 2.197224577  | 0.601111111 |
| 31 | Bad      |        | 1.70  | 0.530628251  | 0.098823529 |
| 32 | Bad      |        | 3.71  | 1.312186389  | 0.20978022  |
| 33 | Bad      |        | 2.74  | 1.006804739  | 0.081093117 |
| 34 | Bad      |        | 1.27  | 0.240302677  | 0.038267813 |
| 35 | Bad      |        | 0.30  | -1.205924024 | 1.026503107 |
| 36 | Bad      |        | 2.84  | 1.045367774  | 0.473871528 |
| 37 | Bad      |        | 0.70  | -0.357455889 | 0.048734916 |
| 38 | Bad      |        | 1.66  | 0.506371273  | 0.158395337 |
| 39 | Good     |        | 0.49  | -0.723408557 | 0.062049995 |
| 40 | Bad      |        | 1.29  | 0.252702354  | 0.202087379 |
| 41 | Bad      |        | 0.80  | -0.223143551 | 4.48        |
| 42 | Bad      |        | 18.00 | 2.890371758  | 10.53555556 |
| 43 | Bad      |        | 0.33  | -1.098612289 | 13.31333333 |
| 44 | Bad      |        | 2.50  | 0.916290732  | 6.98        |
| 45 | Bad      |        | 1.31  | 0.271933715  | 1.081190476 |
| 46 | Bad      |        | 1.50  | 0.405465108  | 2.757777778 |
| 47 | Bad      |        | 1.67  | 0.510825624  | 2.646666667 |
| 48 | Bad      |        | 3.00  | 1.098612289  | 13.31333333 |
| 49 | Bad      |        | 2.00  | 0.693147181  | 7.48        |
| 50 | Bad      |        | 2.60  | 0.955511445  | 1.364615385 |
| 51 | Bad      |        | 1.30  | 0.259511195  | 0.013688412 |
| 52 | Bad      |        | 0.90  | -0.102654154 | 0.037903757 |
| 53 | Good     |        | 0.94  | -0.06285297  | 0.287849231 |
| 54 | Good     |        | 0.88  | -0.123284032 | 0.233440685 |
| 55 | Good     |        | 1.04  | 0.035506688  | 0.366068927 |
| 56 | Good     |        | 0.95  | -0.052185753 | 0.002663438 |
| 57 | Good     |        | 0.93  | -0.071458964 | 0.004278416 |
| 58 | Good     |        | 0.88  | -0.131028262 | 0.00754386  |
| 59 | Good     |        |       |              |             |
| 60 |          |        |       |              |             |



1  
2  
3  
4  
5  
6  
7  
8  
9  
10  
11  
12  
13  
14  
15  
16  
17  
18  
19  
20  
21  
22  
23  
24  
25  
26  
27  
28  
29  
30  
31  
32  
33  
34  
35  
36  
37  
38  
39  
40  
41  
42  
43  
44  
45  
46  
47  
48  
49  
50  
51  
52  
53  
54  
55  
56  
57  
58  
59  
60

## All RR data

|      |      |              |             |
|------|------|--------------|-------------|
| Good | 0.92 | -0.088553397 | 0.00398619  |
| Good | 0.89 | -0.111570701 | 0.004241055 |
| Good | 0.83 | -0.187078253 | 0.007093105 |
| Bad  | 1.13 | 0.122461169  | 0.038914572 |
| Good | 1.03 | 0.027305451  | 0.012378689 |
| Good | 0.93 | -0.075507553 | 0.006959622 |
| Good | 0.91 | -0.093487231 | 0.009592601 |
| Good | 0.90 | -0.103656938 | 0.009180356 |
| Good | 0.88 | -0.131336002 | 0.021997301 |
| Good | 0.98 | -0.021661497 | 0.006716902 |
| Good | 0.93 | -0.070380797 | 0.008483248 |
| Good | 1.02 | 0.017376376  | 0.008095858 |
| Good | 0.96 | -0.044370248 | 0.013424748 |
| Good | 1.02 | 0.018343838  | 0.00822694  |
| Good | 0.88 | -0.129070995 | 0.025000527 |
| Good | 0.86 | -0.156088039 | 0.018069057 |
| Good | 0.87 | -0.139887958 | 0.007814204 |
| Good | 0.93 | -0.07271475  | 0.017290406 |
| Good | 0.85 | -0.166223261 | 0.047950646 |
| Good | 0.98 | -0.021479807 | 0.00403207  |
| Good | 0.95 | -0.051838018 | 0.004202366 |
| Good | 0.87 | -0.138110854 | 0.011015725 |
| Good | 0.97 | -0.029413885 | 0.001640349 |
| Good | 0.99 | -0.014184635 | 0.000592444 |
| Good | 0.99 | -0.013889112 | 0.000381857 |
| Good | 0.94 | -0.060624622 | 0.002553105 |
| Good | 1.06 | 0.062520357  | 0.00350277  |
| Good | 0.94 | -0.062520357 | 0.00350277  |
| Good | 0.93 | -0.073025135 | 0.001458244 |
| Good | 0.93 | -0.074107972 | 0.001892552 |
| Good | 0.97 | -0.028573372 | 0.000799483 |
| Good | 0.93 | -0.077558234 | 0.003276628 |
| Good | 0.94 | -0.0588405   | 0.001659452 |
| Bad  | 1.00 | 0            | 0.089869281 |
| Good | 0.98 | -0.015504187 | 0.003231838 |
| Good | 0.93 | -0.075223421 | 0.002339976 |
| Good | 0.88 | -0.124052649 | 0.007756813 |
| Good | 1.01 | 0.01091989   | 0.001918507 |
| Bad  | 0.97 | -0.032789823 | 0.014777681 |
| Good | 0.95 | -0.051767565 | 0.007845417 |
| Good | 0.96 | -0.039095014 | 0.009954277 |
| Good | 0.98 | -0.015564517 | 0.010507987 |
| Good | 0.95 | -0.04681706  | 0.016043193 |
| Good | 1.08 | 0.079745663  | 0.007477684 |
| Good | 1.02 | 0.017225306  | 0.009432718 |
| Good | 0.91 | -0.095986084 | 0.010575161 |
| Good | 1.01 | 0.005826673  | 0.017429194 |
| Good | 0.98 | -0.015564517 | 0.021936558 |
| Good | 0.90 | -0.109875196 | 0.016826668 |
| Good | 0.94 | -0.058581902 | 0.018142458 |
| Good | 0.98 | -0.015564517 | 0.021936558 |
| Good | 1.01 | 0.008533035  | 0.011088707 |
| Good | 0.95 | -0.051767565 | 0.007845417 |
| Good | 0.93 | -0.074405017 | 0.004076323 |
| Good | 0.92 | -0.084557388 | 0.008920685 |

## All RR data

|    |      |      |              |             |
|----|------|------|--------------|-------------|
| 1  |      |      |              |             |
| 2  |      |      |              |             |
| 3  |      |      |              |             |
| 4  | Good | 1.01 | 0.005826673  | 0.017429194 |
| 5  | Good | 1.03 | 0.033225648  | 0.026281797 |
| 6  | Good | 0.84 | -0.173788522 | 0.017755374 |
| 7  | Good | 0.84 | -0.171568765 | 0.026597453 |
| 8  | Good | 0.96 | -0.037054222 | 0.007582513 |
| 9  | Bad  | 0.92 | -0.087011377 | 0.851212121 |
| 10 | Bad  | 1.00 | 0            | 6.646666667 |
| 11 | Bad  | 1.16 | 0.147452731  | 0.154103105 |
| 12 | Bad  | 0.85 | -0.167054085 | 1.658321678 |
| 13 | Bad  | 0.82 | -0.194156014 | 0.414173669 |
| 14 | Bad  | 0.86 | -0.15415068  | 3.075238095 |
| 15 | Bad  | 1.02 | 0.022223137  | 0.20224966  |
| 16 | Bad  | 1.13 | 0.126293725  | 0.033466218 |
| 17 | Bad  | 0.98 | -0.023530497 | 0.020818965 |
| 18 | Bad  | 1.18 | 0.162166755  | 0.010316573 |
| 19 | Bad  | 0.81 | -0.207639365 | 0.016096327 |
| 20 | Bad  | 0.87 | -0.135955636 | 0.007760099 |
| 21 | Bad  | 0.98 | -0.024097552 | 0.010718384 |
| 22 | Bad  | 0.94 | -0.063100706 | 0.006096982 |
| 23 |      |      |              |             |
| 24 |      |      |              |             |
| 25 |      |      |              |             |
| 26 |      |      |              |             |
| 27 |      |      |              |             |
| 28 |      |      |              |             |
| 29 |      |      |              |             |
| 30 |      |      |              |             |
| 31 |      |      |              |             |
| 32 |      |      |              |             |
| 33 |      |      |              |             |
| 34 |      |      |              |             |
| 35 |      |      |              |             |
| 36 |      |      |              |             |
| 37 |      |      |              |             |
| 38 |      |      |              |             |
| 39 |      |      |              |             |
| 40 |      |      |              |             |
| 41 |      |      |              |             |
| 42 |      |      |              |             |
| 43 |      |      |              |             |
| 44 |      |      |              |             |
| 45 |      |      |              |             |
| 46 |      |      |              |             |
| 47 |      |      |              |             |
| 48 |      |      |              |             |
| 49 |      |      |              |             |
| 50 |      |      |              |             |
| 51 |      |      |              |             |
| 52 |      |      |              |             |
| 53 |      |      |              |             |
| 54 |      |      |              |             |
| 55 |      |      |              |             |
| 56 |      |      |              |             |
| 57 |      |      |              |             |
| 58 |      |      |              |             |
| 59 |      |      |              |             |
| 60 |      |      |              |             |

1  
2  
3  
4  
5  
6  
7  
8  
9  
10  
11  
12  
13  
14  
15  
16  
17  
18  
19  
20  
21  
22  
23  
24  
25  
26  
27  
28  
29  
30  
31  
32  
33  
34  
35  
36  
37  
38  
39  
40  
41  
42  
43  
44  
45  
46  
47  
48  
49  
50  
51  
52  
53  
54  
55  
56  
57  
58  
59  
60

| Reference      | Year | Outcome     | Isolated | IsolatedSD | Isolated.N | Control | ControlSD |
|----------------|------|-------------|----------|------------|------------|---------|-----------|
| 2 Kennedy (1   | 1997 | Anxiety     | 37.8     | 19.9       | 16         | 12.3    | 10.7      |
| 9 Gammon (     | 1998 | Anxiety     | 12.75    | 2.43       | 20         | 8.15    | 3.17      |
| 15 Tarzi (2001 | 2001 | Anxiety     | 15       | 3          | 22         | 8.6     | 3         |
| 16 Day (2011a  | 2011 | Anxiety/Dep | 14.35    | 1.61       | 20         | 13      | 0.8       |
| 13 Findink (20 | 2012 | Anxiety     | 7.23     | 4.1        | 61         | 6.42    | 3.9       |
| Soon (2013     | 2013 | Anxiety     |          |            |            |         |           |
| 17 Lupion-Mer  | 2015 | Anxiety     | 8.2      | 0.48       | 72         | 6.9     | 0.41      |
| 8 Lau (2016)   | 2016 | Anxiety     | 1.48     | 1.72       | 75         | 1.7     | 1.8       |

For peer review only

| Control.N | yi      | vi     |
|-----------|---------|--------|
| 16        | 1.5558  | 0.1628 |
| 20        | 1.5963  | 0.1319 |
| 20        | 2.093   | 0.1476 |
| 83        | 1.3351  | 0.0707 |
| 57        | 0.201   | 0.0341 |
|           | 2.5649  | 0.986  |
| 72        | 2.8969  | 0.0569 |
| 421       | -0.1228 | 0.0157 |

For peer review only

| Reference      | Year | Outcome    | Isolated | IsolatedSD | Isolated.N | Control | ControlSD |
|----------------|------|------------|----------|------------|------------|---------|-----------|
| 1 Kennedy (1   | 1997 | Depression | 16.5     | 9.9        | 16         | 12.3    | 10.7      |
| 10 Gammon (    | 1998 | Depression | 12.45    | 2.21       | 20         | 7.3     | 2.05      |
| Tarzi (200     | 2001 | Depression |          |            |            |         |           |
| 16 Day (2011   | 2011 | Anxiety/De | 14.3     | 1.61       | 20         | 13      | 0.8       |
| 14 Findink (20 | 2012 | Depression | 8.83     | 4.7        | 61         | 7.89    | 4.9       |
| Soon (2013     | 2013 | Depression |          |            |            |         |           |
| 18 Lupion-Mer  | 2015 | Depression | 7.8      | 0.51       | 72         | 6.6     | 0.43      |
| 7 Lau (2016)   | 2016 | Depression | 6.89     | 4.92       | 75         | 7.35    | 5.92      |

For peer review only

| Control.N | yi     | vi    |
|-----------|--------|-------|
| 16        | 0.397  | 0.127 |
| 20        | 2.368  | 0.17  |
|           | 2.101  | 0.125 |
| 83        | 1.335  | 0.071 |
| 57        | 0.195  | 0.034 |
|           | 1.562  | 0.2   |
| 72        | 2.531  | 0.05  |
| 420       | -0.079 | 0.016 |

For peer review only

1  
2  
3  
4  
5  
6  
7  
8  
9  
10  
11  
12  
13  
14  
15  
16  
17  
18  
19  
20  
21  
22  
23  
24  
25  
26  
27  
28  
29  
30  
31  
32  
33  
34  
35  
36  
37  
38  
39  
40  
41  
42  
43  
44  
45  
46  
47  
48  
49  
50  
51  
52  
53  
54  
55  
56  
57  
58  
59  
60

**Case-control studies**

|                                                                                                                                                                                                                                                                          | Colorado (2014)                      | Kennedy (1997)                                                                                                | Livorsi (2015)                                                        | Lupion (2015)                                                         | Masse (2013)                     | Soon (2013)                                | Tarzi (2001)                                                                                          |
|--------------------------------------------------------------------------------------------------------------------------------------------------------------------------------------------------------------------------------------------------------------------------|--------------------------------------|---------------------------------------------------------------------------------------------------------------|-----------------------------------------------------------------------|-----------------------------------------------------------------------|----------------------------------|--------------------------------------------|-------------------------------------------------------------------------------------------------------|
| 1) <u>Is the case definition adequate?</u><br>a) yes, with independent validation *<br>b) yes, eg record linkage or based on self reports<br>c) no description                                                                                                           | *                                    | *                                                                                                             | *                                                                     | *                                                                     | *                                | *                                          | *                                                                                                     |
| 2) <u>Representativeness of the cases</u><br>a) consecutive or obviously representative series of cases *<br>b) potential for selection biases or not stated                                                                                                             | b                                    | b                                                                                                             | *                                                                     | b                                                                     | b                                | *                                          | *                                                                                                     |
| 3) <u>Selection of Controls</u><br>a) community controls (studies of hospital patients) *<br>b) hospital controls<br>c) no description                                                                                                                                   | *                                    | *                                                                                                             | *                                                                     | *                                                                     | *                                | *                                          | *                                                                                                     |
| 4) <u>Definition of Controls</u><br>a) no history of disease (endpoint) *<br>b) no description of source                                                                                                                                                                 | *                                    |                                                                                                               |                                                                       | *                                                                     |                                  |                                            |                                                                                                       |
| <b>Comparability</b>                                                                                                                                                                                                                                                     |                                      |                                                                                                               |                                                                       |                                                                       |                                  |                                            |                                                                                                       |
| 1) <u>Comparability of cases and controls on the basis of the design or analysis</u><br>a) study controls for diagnosis *<br>b) study controls for any additional factor *                                                                                               | *<br>* (l)                           | *<br>* (l, g)                                                                                                 |                                                                       | *<br>* (g)                                                            | *<br>* (g)                       | *<br>* (l, g)                              | *<br>* (l, g)                                                                                         |
| <b>Outcome</b>                                                                                                                                                                                                                                                           |                                      |                                                                                                               |                                                                       |                                                                       |                                  |                                            |                                                                                                       |
| 1) <u>Ascertainment of exposure</u><br>a) secure record (eg surgical records) *<br>b) structured interview where blind to case/control status *<br>c) interview not blinded to case/control status<br>d) written self report or medical record only<br>e) no description | *                                    | *                                                                                                             | *                                                                     | *                                                                     | *                                | *                                          | *                                                                                                     |
| 2) <u>Same method of ascertainment for cases and controls</u><br>a) yes *<br>b) no                                                                                                                                                                                       | Functional Independence Measure ## * | Functional Independence Measure; Beck Inventory Depression; State Anxiety Inventory; Profile Mood States ## * | Hospital Consumer Assessment of Healthcare Providers and Systems ## * | Hospital Consumer Assessment of Healthcare Providers and Systems ## * | Charlston Comorbidity Index ## * | Hospital Anxiety and Depression Scale ## * | Geriatric Depression Scale; Profile of Mood States; Abbreviated Mental Test Score; Barthel Index ## * |
| 3) <u>Non-Response rate</u><br>a) same rate for both groups *<br>b) non respondents described<br>c) rate different and no designation                                                                                                                                    | *                                    | *                                                                                                             | *                                                                     | *                                                                     |                                  |                                            | *                                                                                                     |

**Cohort studies (1)**

| Selection                                                                                                                                                                                                                                                                                                                      | Croft (2015)                 | Day (2011) a                               | Day (2011) b    | Day (2012)                       | Day (2013)                                  | Evans (2003)                   | Findink (2012)                             | Guilley (2017)                     |
|--------------------------------------------------------------------------------------------------------------------------------------------------------------------------------------------------------------------------------------------------------------------------------------------------------------------------------|------------------------------|--------------------------------------------|-----------------|----------------------------------|---------------------------------------------|--------------------------------|--------------------------------------------|------------------------------------|
| 1) <u>Representativeness of the exposed cohort</u><br>a) truly representative of the average patient in the community *<br>b) somewhat representative of the average patient in the community *<br>c) selected group of users eg nurses, volunteers<br>d) no description of the derivation of the cohort                       | *                            | *                                          | *               | *                                | * b                                         | c                              | *b                                         | *b                                 |
| 2) <u>Selection of the non exposed cohort</u><br>a) drawn from the same community as the exposed cohort *<br>b) drawn from a different source<br>c) no description of the derivation of the non exposed cohort                                                                                                                 | *                            | *                                          | *               | *                                | *                                           | *                              | *                                          | *                                  |
| 3) <u>Ascertainment of exposure</u><br>a) secure record (eg surgical records) *<br>b) structured interview *<br>c) written self report<br>d) no description                                                                                                                                                                    | *                            | *                                          | *               | *                                | *                                           | *                              | *                                          | *                                  |
| 4) <u>Demonstration that outcome of interest was not present at start of study</u><br>a) yes *<br>b) no                                                                                                                                                                                                                        | *                            | b                                          | b               | *                                | *                                           | *                              |                                            | *                                  |
| <b>Comparability</b>                                                                                                                                                                                                                                                                                                           |                              |                                            |                 |                                  |                                             |                                |                                            |                                    |
| 1) Comparability of cohorts on the basis of the design or analysis<br>a) study controls for diagnosis *<br>b) study controls for any additional factor *                                                                                                                                                                       | *<br>*<br>(l,g)              |                                            | *<br>*<br>(l,g) | *<br>*<br>(l,g)                  | *<br>*<br>(l,g)                             |                                |                                            | * (g)                              |
| <b>Outcome</b>                                                                                                                                                                                                                                                                                                                 |                              |                                            |                 |                                  |                                             |                                |                                            |                                    |
| 1) <u>Assessment of outcome</u><br>a) independent blind assessment *<br>b) record linkage *<br>c) self report<br>d) no description                                                                                                                                                                                             | Global Trigger Tool<br>### * | Hospital Anxiety and Depression Scale ## * | *               | Clinical diagnosis of delirium * | Hospital Anxiety and Depression Scale ### * | Clinical encounters per hour * | Hospital Anxiety and Depression Scale ## * | State-Trait Anxiety Inventory ## * |
| 2) <u>Was follow-up long enough for outcomes to occur</u><br>a) yes (during hospitalisation or immediately afterwards) *<br>b) no                                                                                                                                                                                              | *                            | *                                          | *               | *                                | * 3 days                                    | *                              | *                                          |                                    |
| 3) <u>Adequacy of follow up of cohorts</u><br>a) complete follow up - all subjects accounted for *<br>b) subjects lost to follow up unlikely to introduce bias - small number lost - > 90 % follow up, or description provided of those lost) *<br>c) follow up rate < 90% and no description of those lost<br>d) no statement | *                            | *                                          | *               | *                                | *                                           | *                              | *                                          | *                                  |

Community – was hospital population  
Time to outcome of interest – question is regarding outcome during isolation

a – age  
g- gender  
l – LOS

# own scale  
## validated scale/s used appropriately



## Cohort studies (2)

| Selection                                                                                                                                                                                                                                                                                                                      | Kirkland (1999) | Lau (2016)                                                                   | Mehotra (2013)                                                           | Stelfox (2003)               | Spense (2011)       | Saint (2003)             | Tran (2016)         | Wassenberg (2010)                                 |
|--------------------------------------------------------------------------------------------------------------------------------------------------------------------------------------------------------------------------------------------------------------------------------------------------------------------------------|-----------------|------------------------------------------------------------------------------|--------------------------------------------------------------------------|------------------------------|---------------------|--------------------------|---------------------|---------------------------------------------------|
| 1) <u>Representativeness of the exposed cohort</u><br>a) truly representative of the average patient in the community *<br>b) somewhat representative of the average patient in the community *<br>c) selected group of users eg nurses, volunteers<br>d) no description of the derivation of the cohort                       | *b              | *                                                                            | *                                                                        | *                            | b                   | *                        | *                   | *                                                 |
| 2) <u>Selection of the non exposed cohort</u><br>a) drawn from the same community as the exposed cohort *<br>b) drawn from a different source<br>c) no description of the derivation of the non exposed cohort                                                                                                                 | *               | *                                                                            | *                                                                        | *                            | *                   | *                        | *                   | *                                                 |
| 3) <u>Ascertainment of exposure</u><br>a) secure record (eg surgical records) *<br>b) structured interview *<br>c) written self report<br>d) no description                                                                                                                                                                    | *               | *b                                                                           | *b                                                                       | *                            | *                   | *                        | *                   | *                                                 |
| 4) <u>Demonstration that outcome of interest was not present at start of study</u><br>a) yes *<br>b) no                                                                                                                                                                                                                        | *               | *                                                                            | *                                                                        | *                            | *                   | *                        | *                   | *                                                 |
| <b>Comparability</b>                                                                                                                                                                                                                                                                                                           |                 |                                                                              |                                                                          |                              |                     |                          |                     |                                                   |
| 1) Comparability of cohorts on the basis of the design or analysis<br>a) study controls for diagnosis *<br>b) study controls for any additional factor *                                                                                                                                                                       |                 | * (g)                                                                        | *<br>* (l,g)                                                             | *<br>* (l,g)                 |                     | *                        | *<br>* (l,g)        | (l,g)                                             |
| <b>Outcome</b>                                                                                                                                                                                                                                                                                                                 |                 |                                                                              |                                                                          |                              |                     |                          |                     |                                                   |
| 1) <u>Assessment of outcome</u><br>a) independent blind assessment *<br>b) record linkage *<br>c) self report<br>d) no description                                                                                                                                                                                             | *<br>#          | Patient Health Questionnaire-9; CQ-5D<br>c telephone /health records<br>## * | Hospital Consumer Assessment of Healthcare Providers and Systems<br>## * | Clinical satisfaction<br># * | Clinical outcomes * | Observation of doctors * | Clinical outcomes * | EQ5-D; Hospital Anxiety and Depression Scale ## * |
| 2) <u>Was follow-up long enough for outcomes to occur</u><br>a) yes (during hospitalisation or immediately afterwards) *<br>b) no                                                                                                                                                                                              | *               |                                                                              | *                                                                        | *                            | *                   | *                        | *                   | *                                                 |
| 3) <u>Adequacy of follow up of cohorts</u><br>a) complete follow up - all subjects accounted for *<br>b) subjects lost to follow up unlikely to introduce bias - small number lost - > 90 % follow up, or description provided of those lost) *<br>c) follow up rate < 90% and no description of those lost<br>d) no statement | *               |                                                                              | 37/278 contact;<br>51/290 non                                            | *                            | *                   |                          | *                   | *                                                 |

## General notes

Community – the population of interest was a hospital population

Time to outcome of interest – question is regarding outcome during isolation or shortly afterwards

1  
2  
3  
4  
5  
6  
7  
8  
9  
10  
11  
12  
13  
14  
15  
16  
17  
18  
19  
20  
21  
22  
23  
24  
25  
26  
27  
28  
29  
30  
31  
32  
33  
34  
35  
36  
37  
38  
39  
40  
41  
42  
43  
44  
45  
46  
47  
48  
49  
50  
51  
52  
53  
54  
55  
56  
57  
58  
59  
60



381x465mm (300 x 300 DPI)

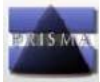

# PRISMA 2009 Checklist

1  
2  
3  
4  
5  
6  
7  
8  
9  
10  
11  
12  
13  
14  
15  
16  
17  
18  
19  
20  
21  
22  
23  
24  
25  
26  
27  
28  
29  
30  
31  
32  
33  
34  
35  
36  
37  
38  
39  
40  
41  
42  
43  
44  
45  
46  
47

| Section/topic                      | #  | Checklist item                                                                                                                                                                                                                                                                                              | Reported on page # |
|------------------------------------|----|-------------------------------------------------------------------------------------------------------------------------------------------------------------------------------------------------------------------------------------------------------------------------------------------------------------|--------------------|
| <b>TITLE</b>                       |    |                                                                                                                                                                                                                                                                                                             |                    |
| Title                              | 1  | Identify the report as a systematic review, meta-analysis, or both.                                                                                                                                                                                                                                         | 1                  |
| <b>ABSTRACT</b>                    |    |                                                                                                                                                                                                                                                                                                             |                    |
| Structured summary                 | 2  | Provide a structured summary including, as applicable: background; objectives; data sources; study eligibility criteria, participants, and interventions; study appraisal and synthesis methods; results; limitations; conclusions and implications of key findings; systematic review registration number. | 1-2                |
| <b>INTRODUCTION</b>                |    |                                                                                                                                                                                                                                                                                                             |                    |
| Rationale                          | 3  | Describe the rationale for the review in the context of what is already known.                                                                                                                                                                                                                              | 3                  |
| Objectives                         | 4  | Provide an explicit statement of questions being addressed with reference to participants, interventions, comparisons, outcomes, and study design (PICOS).                                                                                                                                                  | 4-5                |
| <b>METHODS</b>                     |    |                                                                                                                                                                                                                                                                                                             |                    |
| Protocol and registration          | 5  | Indicate if a review protocol exists, if and where it can be accessed (e.g., Web address), and, if available, provide registration information including registration number.                                                                                                                               | 5                  |
| Eligibility criteria               | 6  | Specify study characteristics (e.g., PICOS, length of follow-up) and report characteristics (e.g., years considered, language, publication status) used as criteria for eligibility, giving rationale.                                                                                                      | 5                  |
| Information sources                | 7  | Describe all information sources (e.g., databases with dates of coverage, contact with study authors to identify additional studies) in the search and date last searched.                                                                                                                                  | 5                  |
| Search                             | 8  | Present full electronic search strategy for at least one database, including any limits used, such that it could be repeated.                                                                                                                                                                               | Suppl information  |
| Study selection                    | 9  | State the process for selecting studies (i.e., screening, eligibility, included in systematic review, and, if applicable, included in the meta-analysis).                                                                                                                                                   | 5                  |
| Data collection process            | 10 | Describe method of data extraction from reports (e.g., piloted forms, independently, in duplicate) and any processes for obtaining and confirming data from investigators.                                                                                                                                  | 5                  |
| Data items                         | 11 | List and define all variables for which data were sought (e.g., PICOS, funding sources) and any assumptions and simplifications made.                                                                                                                                                                       | 5                  |
| Risk of bias in individual studies | 12 | Describe methods used for assessing risk of bias of individual studies (including specification of whether this was done at the study or outcome level), and how this information is to be used in any data synthesis.                                                                                      | 7                  |
| Summary measures                   | 13 | State the principal summary measures (e.g., risk ratio, difference in means).                                                                                                                                                                                                                               | 6-7                |
| Synthesis of results               | 14 | Describe the methods of handling data and combining results of studies, if done, including measures of consistency (e.g., $I^2$ ) for each meta-analysis.                                                                                                                                                   | 6-7                |

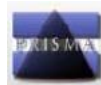

# PRISMA 2009 Checklist

Page 1 of 2

| Section/topic                 | #  | Checklist item                                                                                                                                                                                           | Reported on page # |
|-------------------------------|----|----------------------------------------------------------------------------------------------------------------------------------------------------------------------------------------------------------|--------------------|
| Risk of bias across studies   | 15 | Specify any assessment of risk of bias that may affect the cumulative evidence (e.g., publication bias, selective reporting within studies).                                                             | 7-8                |
| Additional analyses           | 16 | Describe methods of additional analyses (e.g., sensitivity or subgroup analyses, meta-regression), if done, indicating which were pre-specified.                                                         | None               |
| <b>RESULTS</b>                |    |                                                                                                                                                                                                          |                    |
| Study selection               | 17 | Give numbers of studies screened, assessed for eligibility, and included in the review, with reasons for exclusions at each stage, ideally with a flow diagram.                                          | 6                  |
| Study characteristics         | 18 | For each study, present characteristics for which data were extracted (e.g., study size, PICOS, follow-up period) and provide the citations.                                                             | Suppl information  |
| Risk of bias within studies   | 19 | Present data on risk of bias of each study and, if available, any outcome level assessment (see item 12).                                                                                                | Suppl information  |
| Results of individual studies | 20 | For all outcomes considered (benefits or harms), present, for each study: (a) simple summary data for each intervention group (b) effect estimates and confidence intervals, ideally with a forest plot. | Figures            |
| Synthesis of results          | 21 | Present results of each meta-analysis done, including confidence intervals and measures of consistency.                                                                                                  | None               |
| Risk of bias across studies   | 22 | Present results of any assessment of risk of bias across studies (see Item 15).                                                                                                                          | 8-9                |
| Additional analysis           | 23 | Give results of additional analyses, if done (e.g., sensitivity or subgroup analyses, meta-regression [see Item 16]).                                                                                    | None               |
| <b>DISCUSSION</b>             |    |                                                                                                                                                                                                          |                    |
| Summary of evidence           | 24 | Summarize the main findings including the strength of evidence for each main outcome; consider their relevance to key groups (e.g., healthcare providers, users, and policy makers).                     | 8-11               |
| Limitations                   | 25 | Discuss limitations at study and outcome level (e.g., risk of bias), and at review-level (e.g., incomplete retrieval of identified research, reporting bias).                                            | 14                 |
| Conclusions                   | 26 | Provide a general interpretation of the results in the context of other evidence, and implications for future research.                                                                                  | 14                 |
| <b>FUNDING</b>                |    |                                                                                                                                                                                                          |                    |
| Funding                       | 27 | Describe sources of funding for the systematic review and other support (e.g., supply of data); role of funders for the systematic review.                                                               | None               |

From: Moher D, Liberati A, Tetzlaff J, Altman DG, The PRISMA Group (2009). Preferred Reporting Items for Systematic Reviews and Meta-Analyses: The PRISMA Statement. PLoS Med 6(7): e1000097. doi:10.1371/journal.pmed1000097

For more information, visit: [www.prisma-statement.org](http://www.prisma-statement.org).

For peer review only - <http://bmjopen.bmj.com/site/about/guidelines.xhtml>

# BMJ Open

## Impact of isolation on hospitalised patients who are infectious: systematic review with meta-analysis

|                                 |                                                                                                                                                                                                                          |
|---------------------------------|--------------------------------------------------------------------------------------------------------------------------------------------------------------------------------------------------------------------------|
| Journal:                        | <i>BMJ Open</i>                                                                                                                                                                                                          |
| Manuscript ID                   | bmjopen-2019-030371.R3                                                                                                                                                                                                   |
| Article Type:                   | Original research                                                                                                                                                                                                        |
| Date Submitted by the Author:   | 03-Dec-2019                                                                                                                                                                                                              |
| Complete List of Authors:       | Purssell, Edward; City, University of London, School of Health Sciences<br>Gould, Dinah; City, University of London, School of Health Sciences<br>Chudleigh, Jane; City, University of London, School of Health Sciences |
| <b>Primary Subject Heading</b>: | Infectious diseases                                                                                                                                                                                                      |
| Secondary Subject Heading:      | Mental health, Nursing, Patient-centred medicine                                                                                                                                                                         |
| Keywords:                       | Infection control < INFECTIOUS DISEASES, Anxiety disorders < PSYCHIATRY, Quality in health care < HEALTH SERVICES ADMINISTRATION & MANAGEMENT                                                                            |
|                                 |                                                                                                                                                                                                                          |

SCHOLARONE™  
Manuscripts



I, the Submitting Author has the right to grant and does grant on behalf of all authors of the Work (as defined in the below author licence), an exclusive licence and/or a non-exclusive licence for contributions from authors who are: i) UK Crown employees; ii) where BMJ has agreed a CC-BY licence shall apply, and/or iii) in accordance with the terms applicable for US Federal Government officers or employees acting as part of their official duties; on a worldwide, perpetual, irrevocable, royalty-free basis to BMJ Publishing Group Ltd ("BMJ") its licensees and where the relevant Journal is co-owned by BMJ to the co-owners of the Journal, to publish the Work in this journal and any other BMJ products and to exploit all rights, as set out in our [licence](#).

The Submitting Author accepts and understands that any supply made under these terms is made by BMJ to the Submitting Author unless you are acting as an employee on behalf of your employer or a postgraduate student of an affiliated institution which is paying any applicable article publishing charge ("APC") for Open Access articles. Where the Submitting Author wishes to make the Work available on an Open Access basis (and intends to pay the relevant APC), the terms of reuse of such Open Access shall be governed by a Creative Commons licence – details of these licences and which [Creative Commons](#) licence will apply to this Work are set out in our licence referred to above.

Other than as permitted in any relevant BMJ Author's Self Archiving Policies, I confirm this Work has not been accepted for publication elsewhere, is not being considered for publication elsewhere and does not duplicate material already published. I confirm all authors consent to publication of this Work and authorise the granting of this licence.

1  
2  
3 **Impact of isolation on hospitalised patients who are infectious:**  
4 **systematic review with meta-analysis**  
5  
6

7 Edward Purssell, City, University of London, London, UK  
8 Dinah Gould, City, University of London, London, UK  
9 Jane Chudleigh, City, University of London, London, UK  
10  
11  
12

13 Corresponding author:

14 Edward Purssell,  
15 School of Health Sciences,  
16 City, University of London,  
17 1 Myddleton Street,  
18 London EC1R 1UW  
19

20  
21 Telephone: 07782 374217

22 Fax: None

23 Email: [edward.purssell@city.ac.uk](mailto:edward.purssell@city.ac.uk)  
24  
25

26  
27 Keywords: Contact isolation; Infection control (MeSH); Patient isolation (MeSH);  
28 Quarantine (MeSH)  
29

30  
31 Word count - excluding title page, references, figures and tables – 3 301  
32  
33  
34  
35  
36  
37  
38  
39  
40  
41  
42  
43  
44  
45  
46  
47  
48  
49  
50  
51  
52  
53  
54  
55  
56  
57  
58  
59  
60

1  
2  
3 **Impact of isolation on hospitalised patients who are infectious: systematic review**  
4  
5 **with quantitative and meta-analysis**  
6  
7  
8  
9

10 **Abstract**  
11  
12

13  
14  
15 Objective

16  
17 To systematically review the literature exploring impact of isolation on hospitalised  
18 patients who are infectious: psychological and non-psychological outcomes  
19  
20  
21  
22

23  
24 Design

25  
26 Systematic review with meta-analysis  
27  
28  
29

30  
31 Data Sources

32  
33 Embase, Medline and Psycinfo were searched from inception until December 2018.  
34  
35 Reference lists and Google Scholar were also handsearched.  
36  
37  
38  
39

40  
41 Results

42  
43 Twenty six papers published from database inception until December 2018 were  
44 reviewed. A wide range of psychological and non-psychological outcomes were  
45 reported. There was a marked trend for isolated patients to exhibit higher levels of  
46 depression, the pooled standardised mean difference being 1.28 (95% CI: 0.47 to  
47 2.09) and anxiety 1.45 (95% CI: 0.56 to 2.34), although both had high levels of  
48 heterogeneity; and worse outcomes for a range of care-related factors but with  
49 significant variation.  
50  
51  
52  
53  
54  
55  
56  
57  
58  
59  
60



## Conclusion

The review indicates that isolation to contain risk of infection has negative consequences for segregated patients. Although strength of the evidence is weak, comprising primarily single centre convenience samples, consistency of the effects may strengthen this conclusion. More research needs to be undertaken to examine this relationship and develop and test interventions to reduce the negative effects of isolation.

## Strengths and limitations of this study

- This review covers a wide variety of literature from a range of different clinical areas.
- Data collected and the methods of collecting data on the impact of isolation is varied across studies.
- These data do not show if these effects are temporary, or in most cases if they are clinically significant.

## Funding statement

This research received no specific grant from any funding agency in the public, commercial or not-for-profit sectors

## Competing interests statement

No authors have any competing interests to declare

## Introduction

Isolation is an established part of any infection prevention programme. Its purpose is to prevent the transmission of antibiotic-resistant pathogens, those that are highly contagious or cause serious infection.[1] The effectiveness of isolation has been questioned however [2–5] and it can be challenging to undertake, especially if patients' lack of understanding of the need for segregation, boredom or distress result in uncooperative behaviour. [6] A recent survey exploring the care of patients isolated for infectious conditions suggests that in clinical practice the main issues are identifying which patients need to be isolated as quickly as possible and prioritising which patients should be segregated when isolation accommodation is in short supply. Infection preventionists were aware that isolation could have negative effects on patients such as increased risk of anxiety, depression and falls and felt that more should be done to prevent these risks.[6]

Although single rooms are assumed to reduce infection risk, evidence of ability to contain spread is equivocal [7,8] and a recent study conducted in an all-single-room hospital was unable to demonstrate lower infection rates than in hospitals where most care takes place in open wards. [9] This study identified advantages and disadvantages of single room accommodation, whereas isolating infectious patients is generally assumed to result in adverse outcomes.[10]

A systematic review reported eight years ago indicated higher levels of anxiety, depression, perceptions of stigmatisation and a higher incidence of falls, medication errors and other incidents that detract from patient safety among patients who were isolated compared to those who were not.[11] This review reported studies undertaken

1  
2  
3 before 2010 and included patients whose experiences are unlikely to be comparable:  
4  
5 children and adults and those isolated to reduce their own risk of infection as well as  
6  
7 infectious patients. The review was not reported according to standards currently  
8  
9 expected for systematic reviews [12] and presents a qualitative description of patient  
10  
11 outcomes only. A more rigorously reported and up-to-date systematic review is  
12  
13 indicated in view of increasing concern about satisfaction with health care and patient  
14  
15 safety and increasing emphasis on infection prevention as part of the global strategy  
16  
17 to reduce risks of antimicrobial resistance.[13]  
18  
19  
20  
21  
22  
23

24 We undertook a systematic review of the literature to establish the effects of infection  
25  
26 related isolation on psychological and non-psychological care-related outcomes in  
27  
28 adults. This review is therefore more focussed than that previously undertaken which  
29  
30 also included those in protective isolation, and contains a significant body of literature  
31  
32 published since 2010.  
33  
34  
35  
36

### 37 **Method**

38  
39 The eligibility criteria for inclusion was that studies should compare quantitative data  
40  
41 on psychological or non-psychological outcomes in adult patients who are in infective  
42  
43 isolation with those not isolated. Purely symptomatic/disease progression outcomes  
44  
45 were not included, neither were those looking at patients isolated due to  
46  
47 immunosuppression. Studies not containing comparative data between those isolated  
48  
49 and not isolated were also excluded. Search terms were: Patient isolation; cross  
50  
51 infection; contact isolation; respiratory, source or contact isolation; droplet, airborne  
52  
53 or contact precautions; cubicle; MRSA or methicillin resistant *Staphylococcus aureus*;  
54  
55 patient safety or harm; depression; anxiety; adaptation; stress; patient satisfaction;  
56  
57  
58  
59  
60

1  
2  
3 quality of life. These were searched as free-text and index terms where these existed.  
4  
5 The information sources used were Embase, Medline and Psycinfo, which were  
6  
7 searched from inception until December 2018. The full Medline search is shown in  
8  
9 Supplementary File 1. Reference lists and Google Scholar were also handsearched.  
10  
11 Characteristics of included and excluded papers are shown in Supplementary File 2.  
12  
13 The PRISMA flow-chart is given in Supplementary File 3. No protocol was  
14  
15 published in advance.  
16  
17  
18  
19  
20

21 Studies were initially screened for relevance by one author (EP), with the final stage  
22  
23 being undertaken by two (EP, DG). Data were extracted and checked by two authors  
24  
25 (DG, EP); where there were disagreements data were rechecked for relevance and  
26  
27 accuracy. Where available, raw data were extracted and entered into a spreadsheet,  
28  
29 and depending upon the nature of the data either the risk ratio (where numbers of  
30  
31 patients were given) or standardised mean difference (where other statistics were  
32  
33 given) calculated. Results were then presented as forest plots.  
34  
35  
36  
37  
38  
39

40 Due to the variety of different settings and methods it was deemed that the  
41  
42 methodological and clinical heterogeneity was too broad to pool results; apart from  
43  
44 those related to anxiety and depression, for which results were pooled using the  
45  
46 random-effects model. This model assumes that the observed effect from each study  
47  
48 is estimating a related but different true effect, allowing for between-study variation  
49  
50 to be calculated in the form of heterogeneity statistics. All calculations and plots were  
51  
52 produced using the meta and metafor packages in R.[14–16] Where raw data were  
53  
54 not provided the summary results are given in the text but not the forest plots. All data  
55  
56 relevant to the study are included in the article or uploaded as Supplementary File 3.  
57  
58  
59  
60

## Patient and Public Involvement

No patient involved.

## Results

A total of 3 879 papers were retrieved from the three databases; of which 38 were assessed for eligibility by reading the full text. Of these 13 studies provided data suitable for the calculation of risk ratio, 5 giving psychological outcomes,[17–21] and 12 non-psychological;[19,22–32] and 8 provided data for the calculation of standardised mean differences, 6 giving psychological outcomes,[21,30,33–36] and 2 non-psychological.[29,37] A further 6 studies did not provide raw data but are included in the results; 3 each giving psychological outcomes[38–40] and non-psychological outcomes.[17,41,42] Meta-analyses were possible on two outcomes: anxiety and depression from 8 studies using standardised mean difference. [19–21,30,33–36] Where only risk ratio data were given[20,21] conversion to standardised mean difference was undertaken using the Campbell Collaboration calculator (<https://campbellcollaboration.org/research-resources/effect-size-calculator.html>).[43]

Where it was not possible to pool outcome data because of methodological and clinical heterogeneity, the data from studies are shown as forest plots but without meta-analysis. The forest plots contain results from the studies where sufficient data were given to calculate either the risk ratio or standardised mean difference. A number of studies provided data on those under contact precautions, but no comparative data and so were not included.[44–47]

1  
2  
3  
4  
5 Because of the large number of non-psychological outcomes for which RR could be  
6 calculated, it was decided that a change of 20% (i.e. a RR of 0.8 or less, or 1.2 or  
7 more) would be clinically significant, regardless of the statistical significance. This  
8 was a pragmatic decision, and all results are shown in Supplementary File 4. Results  
9 are shown in Figures 1 to 6. Supplementary Figure 1 contains results that did not  
10 meet our criteria for being clinically significant. Outcomes were classified into one of  
11 three categories: those to do with quality of care; satisfaction of care; and adverse  
12 events from which median values and interquartile ranges were calculated.  
13  
14  
15  
16  
17  
18  
19  
20  
21  
22  
23  
24  
25

26 The studies included were primarily single-centre and consisted of case-control,  
27 cross-sectional and cohort studies. Risk of bias was assessed using the Newcastle-  
28 Ottawa scale, full details of each study and its risk of bias are in the Supplementary  
29 File 5.[48] Overall, although these studies have limited generalisability, there did not  
30 appear to be significant cause for concern regarding bias within the limitations  
31 inherent in these study designs. Most studies used established or validated tools[17–  
32 21,23–25,27,29,30,33–37] or clinical outcomes.[22,26,28,31,32]  
33  
34  
35  
36  
37  
38  
39  
40  
41  
42  
43  
44

45 The data from the comparative studies suggest that although in many cases infective  
46 isolation precautions make little difference to psychological outcomes, where it does  
47 make a difference this is primarily negative. There were significant declines in mean  
48 scores related to control and self-esteem, and in many studies increases in the mean  
49 scores for risk of anxiety and depression. However, these findings were not  
50 consistent, and some larger studies showed little or no difference between the groups  
51 for these outcomes. These are shown in Figures 1 and 2 respectively.  
52  
53  
54  
55  
56  
57  
58  
59  
60

1  
2  
3  
4  
5  
6 [INSERT FIGURES 1 and 2 HERE]  
7  
8  
9

10 Figure 1. Risk ratio of psychological events in those isolated versus not isolated  
11  
12

13  
14  
15 Figure 2. Standardised mean difference of psychological scores in those isolated  
16  
17 versus those not isolated  
18  
19

20  
21 For the 8 studies reporting data on anxiety the pooled SMD was 1.45 (95% CI: 0.56 to  
22 2.34); although within this there was significant heterogeneity ( $Q = 168.11$ ,  $df = 7$ ,  $p$   
23  $< 0.0001$ ;  $I^2 = 95.84\%$ ). This was primarily caused by two studies [30,34] which  
24 showed lower levels of anxiety than the remaining studies. For depression the SMD  
25 was 1.28 (95% CI: 0.47 to 2.09); again with significant heterogeneity ( $Q = 154.5$ ,  $df =$   
26 7,  $p < 0.0001$ ;  $I^2 = 95.47\%$ ), in this case the studies falling into two categories, those  
27 with lower [30,34,35] and higher depression scores among those  
28 isolated.[19,20,33,36] The forest plots for these outcomes are shown in Figures 3 and  
29 4 respectively.  
30  
31  
32  
33  
34  
35  
36  
37  
38  
39  
40  
41  
42  
43  
44  
45  
46  
47  
48  
49  
50  
51  
52  
53  
54  
55  
56  
57  
58  
59  
60

[INSERT FIGURES 3 and 4 HERE]

Figure 3. Meta-analysis of the standardised mean difference of anxiety in those  
isolated versus those not isolated

Figure 4. Meta-analysis of the standardised mean difference of depression in those  
isolated versus those not isolated

1  
2  
3  
4  
5  
6 Studies not reporting the raw data showed that contact precautions were associated  
7  
8 with depression OR 1.4 (95% CI 1.2 to 1.5) but not anxiety OR 0.8 (95% CI 0.7 to  
9  
10 1.1) in a non-ICU population.[41] There was also an association with delirium OR  
11  
12 1.40 (95% CI 1.24 to 1.51); although this was primarily among those who were newly  
13  
14 diagnosed as needing isolation OR 1.75 (95% CI 1.60 to 1.92,  $p<0.01$ ) rather than  
15  
16 those who had been under contact precautions for their entire stay OR 0.97 (95% CI  
17  
18 0.86 to 1.09,  $p=0.60$ ).[17] Another study showed no difference in the median values  
19  
20 for the Hospital Anxiety and Depression Scale anxiety or depression scores (HADS-A  
21  
22 and -D), or the EuroQol Visual Analogue Scale EQ VAS scores.[42]  
23  
24  
25  
26  
27

28 For non-psychological outcomes, using a difference in the risk of +/- 20% of an event  
29  
30 as being a measure of clinical significance it appears there was a trend for less  
31  
32 attention to be given to, and for more errors to occur in those who were isolated.  
33  
34 However, again there was wide variation between studies. Data on these outcomes  
35  
36 are given in Figures 5 and 6, and the non-clinically significant risks in the  
37  
38 Supplementary Figure 1. For those outcomes associated with quality, the median risk  
39  
40 ratio (with positive outcomes reversed so a higher risk ratio is associated with a worse  
41  
42 outcome) was 0.94 (IQR 0.92 to 0.98), satisfaction 0.95 (IQR 0.89 to 1.01) and  
43  
44 adverse events was 1.27 (0.91 to 2.5). The minimum and maximum risk ratio for  
45  
46 each category was 0.49 and 1.72; 0.3 and 8; and 0.3 and 18 respectively.  
47  
48  
49  
50  
51  
52  
53

54 [INSERT FIGURES 5 and 6 HERE]  
55  
56  
57  
58  
59  
60



1  
2  
3 Figure 5. Risk ratio of non-psychological events in those isolated versus not isolated  
4  
5 with a RR of  $\leq 0.8$  or  $\geq 1.2$

6  
7  
8 \* outcome was measured in rate per 100 admissions  
9

10  
11  
12 Figure 6. Standardised mean difference of non-psychological scores in those isolated  
13  
14 versus those not isolated

15  
16  
17 FIM – functional independence measure  
18

19  
20  
21 A study not giving raw data which looked at the rates of falls and pressure ulcers  
22  
23 before and after a policy change that resulted in the discontinuation of contact  
24  
25 precautions for patients with methicillin resistant *Staphylococcus aureus* (MRSA) or  
26  
27 vancomycin resistant enterococci (VRE) found that falls and pressure ulcers were  
28  
29 more common among those with MRSA or VRE both before the change (when they  
30  
31 were in isolation) and afterwards (when they were not). Before the change the number  
32  
33 of falls was 4.57 vs 2.04 per 1000 patient-days respectively ( $p < 0.0001$ ) and pressure  
34  
35 ulcers 4.87 vs 1.22 per 1000 patient-days ( $p < 0.0001$ ). After the policy change the  
36  
37 same numbers were falls 4.82 vs 2.10 ( $p < 0.0001$ ) and pressure ulcers 4.17 vs 1.19 per  
38  
39 1000 patient-days ( $p < 0.0001$ ).[39] Other studies found that staff spent less time with  
40  
41 those on contact precautions: internal medicine interns spent less time with their  
42  
43 isolated patients compared to non-isolated patients, the median times being 5.2 and  
44  
45 6.9 minutes respectively ( $p < 0.001$ )[38]; while the mean number of contacts per hour  
46  
47 with healthcare workers was 2.1 compared to 4.2 in those not isolated ( $p = 0.03$ ),  
48  
49 although the duration was longer at 4.5 minutes compared to 2.8 ( $p = 0.6$ ).[40]  
50  
51  
52  
53  
54  
55  
56  
57

## 58 **Discussion**

59  
60

1  
2  
3 Current recommendations say that contact precautions should include a single room,  
4  
5 with personal protective equipment consisting of a gown and gloves for all patient  
6  
7 contacts or contacts with potentially contaminated environmental areas.[1] This  
8  
9 review has shown that there are a number of apparently negative aspects to contact  
10  
11 precautions, in particular with regards to psychological effects and a reduction in the  
12  
13 quality of some aspects of care. These data come from studies carried out in a variety  
14  
15 of countries and different types of facilities; although there are few data from  
16  
17 particularly vulnerable populations such as the elderly.  
18  
19  
20  
21  
22

23  
24 Although at times there are discussions as to the necessity of contact precautions for  
25  
26 drug resistant organisms, with some arguing that that there is mixed evidence for or  
27  
28 against their use[49] another recent review has concluded that they are of great  
29  
30 importance in the control of epidemic and endemic multidrug-resistant  
31  
32 microorganisms.[50] The ethics of using contact precautions and other forms of  
33  
34 isolation rely on a positive assessment of the balance between the risks and benefits of  
35  
36 this to the individual concerned and that of the broader population of patients and  
37  
38 staff.[51] However, even when this assessment is positive, it is important to ensure  
39  
40 that any harm to the individual is minimised.  
41  
42  
43  
44  
45

46  
47 One way of balancing the various priorities is to use the GRADE Evidence to  
48  
49 Decision Framework, which provides criteria for making recommendations at the  
50  
51 individual, group and policy-levels, and provides a number of highly patient focussed  
52  
53 criteria for doing this. In addition to the certainty of evidence and resource  
54  
55 requirements, it also requires consideration of: the balance of desirable and  
56  
57 undesirable effects; the impact upon equity; and the feasibility and acceptability of the  
58  
59  
60

1  
2  
3 intervention.[52] The last two of these might have very different outcomes when  
4  
5 considered at the population and individual levels; and there is certainly evidence here  
6  
7 that for the individual patient the balance of desirable and undesirable effects might  
8  
9 be very different to that of the broader population.  
10  
11  
12  
13

14  
15 However, within the broad population of infected or potentially infected patients,  
16  
17 some groups might have different needs. For example a study of people isolated for  
18  
19 MERS found that while access to telephones reduced anxiety and anger; access to  
20  
21 email, text and internet increased these.[53] This was not an area investigated in any  
22  
23 depth in these studies. Another area where information may be lacking is that of age,  
24  
25 as older people in particular might feel sadness and loneliness more; and gender, as  
26  
27 qualitative data suggest that women in isolation were more concerned about  
28  
29 precautions and transmission while men were more resigned, rational and tended to  
30  
31 cope better.[54]  
32  
33  
34  
35  
36  
37

38 In some countries, such as the United States single-rooms have become the standard  
39  
40 for new hospitals and so one might expect fewer adverse effects if everyone is in a  
41  
42 single room, this being the norm. However it may be that a single room is necessary  
43  
44 but not sufficient for these findings, and that it is the combination of a single room  
45  
46 with an infection that leads to these results. Certainly it is far from clear that the long  
47  
48 list of advantages claimed for single rooms which include reduced stress, the ability to  
49  
50 deliver better care, and a lower probability of dietary or medication errors apply to  
51  
52 this group of patients.[55]  
53  
54  
55  
56  
57  
58  
59  
60

1  
2  
3 Caring for patients in single-rooms does have many challenges, but there is evidence  
4 that these can be mitigated in a general population;[9] however the expanding  
5 literature on how this can be done in a general population does not necessarily apply  
6 here due to the necessity of isolation procedures which are, by design, ‘a barrier’.  
7  
8 Therefore patients’ needs for greater social interaction will need a solution quite  
9 different from that which might be used for a different patient population, and the  
10 benefit of choice about this which single rooms offer does not apply here.[56]  
11  
12

13  
14  
15  
16  
17  
18  
19  
20  
21 Although this review has quantified the extent of the problem, we have not been able  
22 to find solutions in the literature. Care might be improved through increased staff  
23 attention with more resources being allocated to these patients, although the extra cost  
24 of contact precautions is already considerable, one estimate being that it was an extra  
25 \$158.90 (95% CI \$124.90 to \$192.80) per patient day.[57] Alternatively new ways of  
26 working might be developed, perhaps using technology to mitigate some of these  
27 problems. Technology might be particularly useful in reducing adverse events such  
28 as medication or clinical errors; although increasing satisfaction and some areas of  
29 quality are more likely to be achieved by increasing the availability of staff and other  
30 people. The extent to which scarce resources are allocated to this may be driven in  
31 part by the longevity of any negative effects; which current literature is not really able  
32 to clarify. To understand this longitudinal studies are needed.  
33  
34  
35  
36  
37  
38  
39  
40  
41  
42  
43  
44  
45  
46  
47  
48  
49  
50

### 51 Study strengths and limitations

52  
53 This review suggests that infectious isolation has a number of negative effects on  
54 patients. Because this evidence is comprised of cohort and case-control studies, a  
55 claim for a causal relationship can not be made on this evidence, although the strong  
56  
57  
58  
59  
60

1  
2  
3 and consistent effects across the studies may increase the confidence in this  
4  
5 relationship. There are some qualitative data, although more in-depth mixed-methods  
6  
7 data where those reporting negative effects are questioned about them would  
8  
9 strengthen the evidence on this. In some cases large effect sizes were accompanied  
10  
11 by very wide confidence intervals, suggesting that studies were underpowered, thus  
12  
13 studies with larger sample sizes would be useful. It would also be useful if there were  
14  
15 more consistent methods of examining and reporting these data, particularly outside  
16  
17 of the realms of depression and anxiety where the variety of methods makes analysis  
18  
19 of the body of evidence difficult. We were also unable to assess whether these effects  
20  
21 varied according to reason for isolation; or to understand if they are likely to be long-  
22  
23 term or simply temporary phenomena.  
24  
25  
26  
27  
28  
29

30 Although these data suggest that there is a problem, there is a clear gap both in what  
31  
32 we know about improving the experience of isolation and what can be done in  
33  
34 practical terms to make it more tolerable for patients and their families. In particular  
35  
36 older people who may be most vulnerable to these negative effects were under-  
37  
38 represented in these studies; and this group are likely to represent an increasingly  
39  
40 large proportion of those isolated.  
41  
42  
43  
44  
45  
46  
47  
48

#### 49 Contributors

50  
51 EP, DG and JC conceived the review, EP conducted the search, EP and DG examined  
52  
53 the studies and extracted data, EP undertook the quantitative analysis, EP, DG and JC  
54  
55 wrote the discussion.  
56  
57  
58  
59  
60

1  
2  
3 Funding  
4

5 This research received no specific grant from any funding agency in the public,  
6 commercial or not-for-profit sector.  
7  
8  
9

10  
11  
12 Competing interests statement  
13

14 No authors have any competing interests to declare.  
15  
16

17  
18  
19  
20  
21 Data Availability  
22

23 All data relevant to the study are included in the article or uploaded as supplementary  
24 information.  
25  
26  
27  
28  
29  
30  
31  
32  
33  
34  
35  
36  
37  
38  
39  
40  
41  
42  
43  
44  
45  
46  
47  
48  
49  
50  
51  
52  
53  
54  
55  
56  
57  
58  
59  
60

## References

- 1 Centres for Disease Control and Prevention. Transmission-Based Precautions | Basics | Infection Control | CDC. 2007. <https://www.cdc.gov/infectioncontrol/basics/transmission-based-precautions.html> (accessed 9 Feb 2019).
- 2 Barlow GD, Knight J, McKay I, *et al.* An audit of the use of side- and isolation room facilities in a UK teaching hospital. *J Hosp Infect* 2006;**62**:110–2. doi:10.1016/j.jhin.2005.05.006
- 3 Fusco FM, Puro V, Baka A, *et al.* Isolation rooms for highly infectious diseases: an inventory of capabilities in European countries. *J Hosp Infect* 2009;**73**:15–23. doi:10.1016/j.jhin.2009.06.009
- 4 Damji S, Barlow GD, Patterson L, *et al.* An audit of the use of isolation facilities in a UK National Health Service trust. *J Hosp Infect* 2005;**60**:213–7. doi:10.1016/j.jhin.2004.11.013
- 5 Wigglesworth N, Wilcox MH. Prospective evaluation of hospital isolation room capacity. *J Hosp Infect* 2006;**63**:156–61. doi:10.1016/j.jhin.2006.02.008
- 6 Gould DJ, Drey NS, Chudleigh J, *et al.* Isolating infectious patients: organizational, clinical, and ethical issues. *Am J Infect Control* 2018;**46**:e65–9. doi:10.1016/j.ajic.2018.05.024
- 7 Dettenkofer M, Wenzler S, Amthor S, *et al.* Does disinfection of environmental surfaces influence nosocomial infection rates? A systematic review. *Am J Infect Control* 2004;**32**:84–9. doi:10.1016/j.ajic.2003.07.006

- 1  
2  
3 8 Zingg W, Holmes A, Dettenkofer M, *et al.* Hospital organisation, management,  
4 and structure for prevention of health-care-associated infection: a systematic  
5 review and expert consensus. *Lancet Infect Dis* 2015;**15**:212–24.  
6  
7 doi:10.1016/S1473-3099(14)70854-0  
8  
9  
10  
11  
12  
13 9 Simon M, Maben J, Murrells T, *et al.* Is single room hospital accommodation  
14 associated with differences in healthcare-associated infection, falls, pressure  
15 ulcers or medication errors? A natural experiment with non-equivalent controls.  
16  
17 *Journal of Health Services Research & Policy* 2016;**21**:147–55.  
18  
19 doi:10.1177/1355819615625700  
20  
21  
22  
23  
24  
25  
26 10 Barratt RL, Shaban R, Moyle W. Patient experience of source isolation: lessons  
27 for clinical practice. *Contemp Nurse* 2011;**39**:180–93. doi:10.5172/conu.2011.180  
28  
29  
30  
31  
32 11 Abad C, Fearday A, Safdar N. Adverse effects of isolation in hospitalised  
33 patients: a systematic review. *Journal of Hospital Infection* 2010;**76**:97–102.  
34  
35 doi:10.1016/j.jhin.2010.04.027  
36  
37  
38  
39  
40 12 Moher D, Liberati A, Tetzlaff J, *et al.* Preferred reporting items for systematic  
41 reviews and meta-analyses: the PRISMA statement. *BMJ* 2009;**339**:b2535.  
42  
43 doi:10.1136/bmj.b2535  
44  
45  
46  
47 13 World Health Organization. *Global action plan on antimicrobial resistance.*  
48  
49 *World Health Organization.* Geneva, Switzerland: : World Health Organization  
50  
51 2015. <http://www.who.int/iris/handle/10665/193736>  
52  
53  
54  
55 14 R Core Team. *R: A language and environment for statistical computing.* Vienna,  
56  
57 Austria: 2018. <https://www.R-project.org/>  
58  
59  
60



- 1  
2  
3 15 Schwarzer G. meta: An R package for meta-analysis. *R News* 2007;**7**:40–5.  
4  
5  
6  
7 16 Viechtbauer W. Conducting Meta-analyses in R with the R metafor package. *J*  
8  
9 *Stat Soft* 2010;**36**. doi:10.18637/jss.v036.i03  
10  
11  
12 17 Day HR, Perencevich EN, Harris AD, *et al*. Association between contact  
13  
14 precautions and delirium at a tertiary care center. *Infection Control & Hospital*  
15  
16 *Epidemiology* 2012;**33**:34–9. doi:10.1086/663340  
17  
18  
19 18 Day HR, Perencevich EN, Harris AD, *et al*. Depression, anxiety, and moods of  
20  
21 hospitalized patients under contact precautions. *Infection Control & Hospital*  
22  
23 *Epidemiology* 2013;**34**:251–8. doi:10.1086/669526  
24  
25  
26  
27 19 Lupión-Mendoza C, Antúnez-Domínguez MJ, González-Fernández C, *et al*.  
28  
29 Effects of isolation on patients and staff. *American Journal of Infection Control*  
30  
31 2015;**43**:397–9. doi:10.1016/j.ajic.2015.01.009  
32  
33  
34  
35 20 Soon MML, Madigan E, Jones KR, *et al*. An exploration of the psychologic  
36  
37 impact of contact isolation on patients in Singapore. *American Journal of*  
38  
39 *Infection Control* 2013;**41**:e111–3. doi:10.1016/j.ajic.2013.01.037  
40  
41  
42  
43 21 Tarzi S, Kennedy P, Stone S, *et al*. Methicillin-resistant *Staphylococcus aureus*:  
44  
45 psychological impact of hospitalization and isolation in an older adult population.  
46  
47 *Journal of Hospital Infection* 2001;**49**:250–4. doi:10.1053/jhin.2001.1098  
48  
49  
50  
51 22 Tran K, Bell C, Stall N, *et al*. The Effect of Hospital Isolation Precautions on  
52  
53 Patient Outcomes and Cost of Care: A Multi-Site, Retrospective, Propensity  
54  
55 Score-Matched Cohort Study. *J Gen Intern Med* 2017;**32**:262–8.  
56  
57  
58  
59 doi:10.1007/s11606-016-3862-4  
60

- 1  
2  
3 23 Guilley-Lerondeau B, Bourigault C, Guille des Buttes A-C, *et al.* Adverse effects  
4 of isolation: a prospective matched cohort study including 90 direct interviews of  
5 hospitalized patients in a French University Hospital. *European Journal of*  
6 *Clinical Microbiology & Infectious Diseases* 2017;**36**:75–80.  
7  
8 doi:10.1007/s10096-016-2772-z  
9  
10  
11  
12  
13  
14  
15 24 Mehrotra P, Croft L, Day HR, *et al.* Effects of contact precautions on patient  
16 perception of care and satisfaction: A prospective cohort study. *Infection Control*  
17 *& Hospital Epidemiology* 2013;**34**:1087–93. doi:10.1086/673143  
18  
19  
20  
21  
22  
23 25 Livorsi DJ, Kundu MG, Batteiger B, *et al.* Effect of contact precautions for  
24 MRSA on patient satisfaction scores. *Journal of Hospital Infection* 2015;**90**:263–  
25  
26 6. doi:10.1016/j.jhin.2015.02.007  
27  
28  
29  
30  
31 26 Evans HL, Shaffer MM, Hughes MG, *et al.* Contact isolation in surgical patients:  
32 A barrier to care? *Surgery* 2003;**134**:180–8. doi:10.1067/msy.2003.222  
33  
34  
35  
36  
37 27 Croft LD, Liquori M, Ladd J, *et al.* The effect of contact precautions on frequency  
38 of hospital adverse events. *Infection Control & Hospital Epidemiology*  
39 2015;**36**:1268–74. doi:10.1017/ice.2015.192  
40  
41  
42  
43  
44  
45 28 Saint S, Higgins LA, Nallamothu BK, *et al.* Do physicians examine patients in  
46 contact isolation less frequently? A brief report. *Am J Infect Control*  
47 2003;**31**:354–6.  
48  
49  
50  
51  
52  
53 29 Masse V, Valiquette L, Boukhoudmi S, *et al.* Impact of methicillin resistant  
54 *Staphylococcus aureus* contact isolation units on medical care. *PLoS ONE*  
55 2013;**8**:e57057. doi:10.1371/journal.pone.0057057  
56  
57  
58  
59  
60

- 1  
2  
3 30 Lau D, Majumdar SR, McAlister FA. Patient isolation precautions and 30-day  
4 risk of readmission or death after hospital discharge: a prospective cohort study.  
5  
6 *International Journal of Infectious Diseases* 2016;**43**:74–6.  
7  
8 doi:10.1016/j.ijid.2015.12.018  
9  
10  
11  
12  
13 31 Spence MR, McQuaid M. The interrelationship of isolation precautions and  
14 adverse events in an acute care facility. *American Journal of Infection Control*  
15  
16 2011;**39**:154–5. doi:10.1016/j.ajic.2010.04.213  
17  
18  
19  
20  
21 32 Stelfox HT. Safety of Patients Isolated for Infection Control. *JAMA*  
22  
23 2003;**290**:1899. doi:10.1001/jama.290.14.1899  
24  
25  
26  
27 33 Gammon J. Analysis of the stressful effects of hospitalisation and source isolation  
28 on coping and psychological constructs. *Int J Nurs Pract* 1998;**4**:84–96.  
29  
30  
31  
32 34 Findik UY, Ozbaş A, Cavdar I, *et al.* Effects of the contact isolation application  
33 on anxiety and depression levels of the patients: Effects of the contact isolation  
34 application. *International Journal of Nursing Practice* 2012;**18**:340–6.  
35  
36 doi:10.1111/j.1440-172X.2012.02049.x  
37  
38  
39  
40  
41  
42  
43 35 Kennedy P, Hamilton LR. Psychological impact of the management of  
44 methicillin-resistant *Staphylococcus aureus* (MRSA) in patients with spinal cord  
45 injury. *Spinal Cord* 1997;**35**:617–9.  
46  
47  
48  
49  
50 36 Day HR, Morgan DJ, Himelhoch S, *et al.* Association between depression and  
51 contact precautions in veterans at hospital admission. *American Journal of*  
52  
53 *Infection Control* 2011;**39**:163–5. doi:10.1016/j.ajic.2010.06.024  
54  
55  
56  
57  
58  
59  
60

- 1  
2  
3 37 Colorado B, Del Toro D, Tarima S. Impact of Contact Isolation on FIM Score  
4 Change, FIM Efficiency Score, and Length of Stay in Patients in Acute Inpatient  
5 Rehabilitation Facility. *PM&R* 2014;**6**:988–91. doi:10.1016/j.pmrj.2014.05.017  
6  
7  
8  
9  
10  
11 38 Dashiell-Earp CN, Bell DS, Ang AO, *et al.* Do physicians spend less time with  
12 patients in contact isolation?: a time-motion study of internal medicine interns.  
13 *JAMA Intern Med* 2014;**174**:814–5. doi:10.1001/jamainternmed.2014.537  
14  
15  
16  
17  
18  
19 39 Gandra S, Barysaukas CM, Mack DA, *et al.* Impact of contact precautions on  
20 falls, pressure ulcers and transmission of MRSA and VRE in hospitalized  
21 patients. *Journal of Hospital Infection* 2014;**88**:170–6.  
22  
23  
24  
25  
26  
27  
28  
29 40 Kirkland KB, Weinstein JM. Adverse effects of contact isolation. *Lancet*  
30 1999;**354**:1177–8. doi:10.1016/S0140-6736(99)04196-3  
31  
32  
33  
34  
35 41 Day HR, Perencevich EN, Harris AD, *et al.* Do contact precautions cause  
36 depression? A two-year study at a tertiary care medical centre. *Journal of*  
37  
38  
39  
40  
41  
42  
43 42 Wassenberg MWM, Severs D, Bonten MJM. Psychological impact of short-term  
44 isolation measures in hospitalised patients. *Journal of Hospital Infection*  
45  
46  
47  
48  
49  
50  
51 43 Wilson DB. Practical Meta-Analysis Effect Size Calculator [Online calculator].  
52  
53  
54  
55  
56  
57  
58  
59  
60

- 1  
2  
3 44 Chittick P, Koppisetty S, Lombardo L, *et al.* Assessing patient and caregiver  
4 understanding of and satisfaction with the use of contact isolation. *American*  
5 *Journal of Infection Control* 2016;**44**:657–60. doi:10.1016/j.ajic.2015.12.033  
6  
7  
8  
9  
10  
11 45 Davies H, Rees J. Psychological effects of isolation nursing (1): Mood  
12 disturbance. *Nurs Stand* 2000;**14**:35–8. doi:10.7748/ns2000.03.14.28.35.c2799  
13  
14  
15  
16 46 Rees J, Davies HR, Birchall C, *et al.* Psychological effects of source isolation  
17 nursing (2): Patient satisfaction. *Nurs Stand* 2000;**14**:32–6.  
18  
19  
20  
21  
22  
23  
24  
25 47 Wilkins EG, Ellis ME, Dunbar EM, *et al.* Does isolation of patients with  
26 infections induce mental illness? *J Infect* 1988;**17**:43–7.  
27  
28  
29  
30 48 Wells G, Shea B, O’Connell D, *et al.* The Newcastle-Ottawa Scale (NOS) for  
31 assessing the quality of nonrandomised studies in meta-analyses.  
32  
33  
34  
35 2019.[http://www.ohri.ca/programs/clinical\\_epidemiology/oxford.asp](http://www.ohri.ca/programs/clinical_epidemiology/oxford.asp) (accessed 14  
36 Aug 2019).  
37  
38  
39  
40 49 Cohen CC, Cohen B, Shang J. Effectiveness of contact precautions against  
41 multidrug-resistant organism transmission in acute care: a systematic review of  
42 the literature. *Journal of Hospital Infection* 2015;**90**:275–84.  
43  
44  
45  
46  
47  
48  
49  
50 50 Landelle C, Pagani L, Harbarth S. Is patient isolation the single most important  
51 measure to prevent the spread of multidrug-resistant pathogens? *Virulence*  
52  
53  
54  
55  
56  
57  
58  
59  
60

- 1  
2  
3 51 Santos RP, Mayo TW, Siegel JD. Healthcare epidemiology: Active surveillance  
4 cultures and contact precautions for control of multidrug-resistant organisms:  
5 Ethical considerations. *Clinical Infectious Diseases* 2008;**47**:110–6.  
6  
7 doi:10.1086/588789  
8  
9  
10  
11  
12  
13 52 Alonso-Coello P, Oxman AD, Moberg J, *et al.* GRADE Evidence to Decision  
14 (EtD) frameworks: a systematic and transparent approach to making well  
15 informed healthcare choices. 2: Clinical practice guidelines. *BMJ* 2016;:i2089.  
16  
17 doi:10.1136/bmj.i2089  
18  
19  
20  
21  
22  
23 53 Jeong H, Yim HW, Song Y-J, *et al.* Mental health status of people isolated due to  
24 Middle East Respiratory Syndrome. *Epidemiology and Health* 2016;**38**:e2016048.  
25  
26 doi:10.4178/epih.e2016048  
27  
28  
29  
30  
31 54 Madsen A. Experience of source isolation during hospitalization – a qualitative  
32 study. *Antimicrobial Resistance and Infection Control* 2015;**4**. doi:10.1186/2047-  
33 2994-4-S1-P95  
34  
35  
36  
37  
38  
39 55 Rechel B, European Health Property Network, European Observatory on Health  
40 Systems and Policies, editors. *Investing in hospitals of the future*. Copenhagen: :  
41 World Health Organization, European Observatory on Health Systems and  
42 Policies 2009.  
43  
44  
45  
46  
47  
48  
49 56 Persson E, Anderberg P, Kristensson Ekwall A. A room of one's own - Being  
50 cared for in a hospital with a single-bed room design. *Scandinavian Journal of*  
51 *Caring Sciences* 2015;**29**:340–6. doi:10.1111/scs.12168  
52  
53  
54  
55  
56  
57  
58  
59  
60

1  
2  
3 57 Roth JA, Hornung-Winter C, Radicke I, *et al.* Direct Costs of a Contact Isolation

4  
5 Day: A Prospective Cost Analysis at a Swiss University Hospital. *Infection*

6  
7  
8 *Control & Hospital Epidemiology* 2018;**39**:101–3. doi:10.1017/ice.2017.258  
9  
10  
11  
12  
13  
14  
15  
16  
17  
18  
19  
20  
21  
22  
23  
24  
25  
26  
27  
28  
29  
30  
31  
32  
33  
34  
35  
36  
37  
38  
39  
40  
41  
42  
43  
44  
45  
46  
47  
48  
49  
50  
51  
52  
53  
54  
55  
56  
57  
58  
59  
60

1  
2  
3  
4  
5  
6  
7  
8  
9  
10  
11  
12  
13  
14  
15  
16  
17  
18  
19  
20  
21  
22  
23  
24  
25  
26  
27  
28  
29  
30  
31  
32  
33  
34  
35  
36  
37  
38  
39  
40  
41  
42  
43  
44  
45  
46  
47  
48  
49  
50  
51  
52  
53  
54  
55  
56  
57  
58  
59  
60

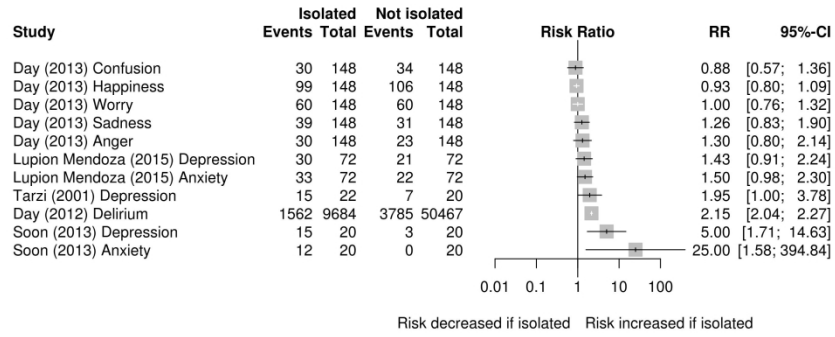

Figure 1. Risk ratio of psychological events in those isolated versus not isolated

279x127mm (300 x 300 DPI)





Figure 2. Standardised mean difference of psychological scores in those isolated versus those not isolated

279x152mm (300 x 300 DPI)

1  
2  
3  
4  
5  
6  
7  
8  
9  
10  
11  
12  
13  
14  
15  
16  
17  
18  
19  
20  
21  
22  
23  
24  
25  
26  
27  
28  
29  
30  
31  
32  
33  
34  
35  
36  
37  
38  
39  
40  
41  
42  
43  
44  
45  
46  
47  
48  
49  
50  
51  
52  
53  
54  
55  
56  
57  
58  
59  
60

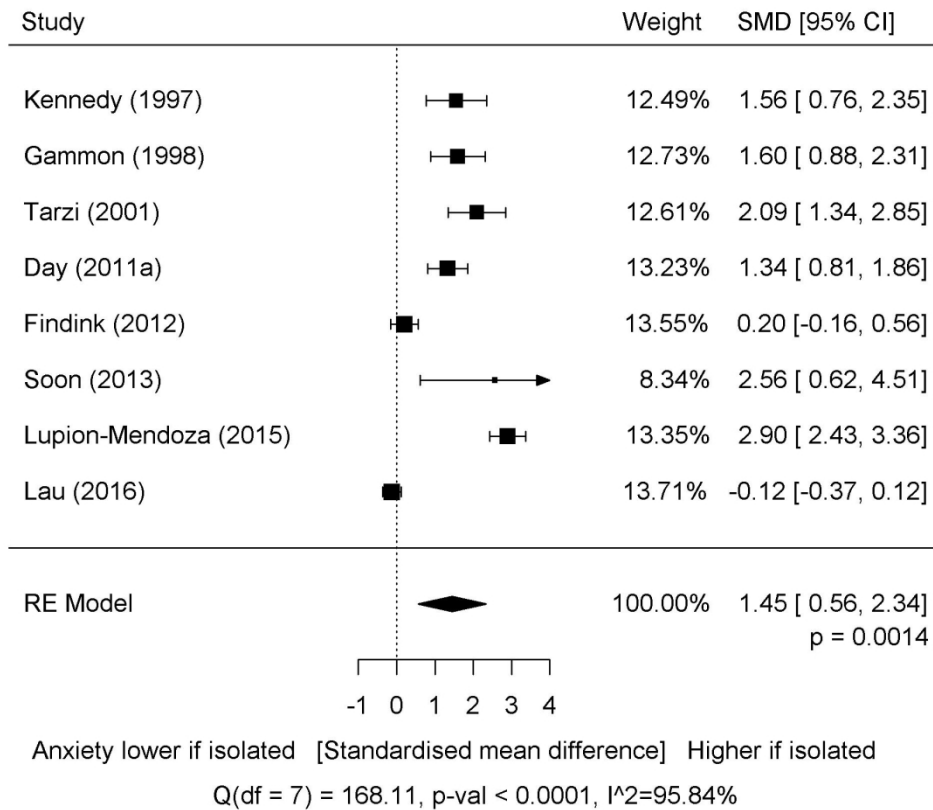

Figure 3. Meta-analysis of the standardised mean difference of anxiety in those isolated versus those not isolated

169x169mm (300 x 300 DPI)



Figure 4. Meta-analysis of the standardised mean difference of depression in those isolated versus those not isolated

169x169mm (300 x 300 DPI)



Figure 5. Risk ratio of non-psychological events in those isolated versus not isolated with a RR of  $\leq 0.8$  or  $> 1.2$

381x296mm (300 x 300 DPI)



Figure 6. Standardised mean difference of non-psychological scores in those isolated versus those not isolated

321x127mm (300 x 300 DPI)

1  
2  
3  
4  
5  
6  
7  
8  
9  
10  
11  
12  
13  
14  
15  
16  
17  
18  
19  
20  
21  
22  
23  
24  
25  
26  
27  
28  
29  
30  
31  
32  
33  
34  
35  
36  
37  
38  
39  
40  
41  
42  
43  
44  
45  
46  
47  
48  
49  
50  
51  
52  
53  
54  
55  
56  
57  
58  
59  
60



381x465mm (300 x 300 DPI)

1  
2  
3 Supplementary File 1. Search strategy - Medline  
4  
5  
6

- 7 1. patient isolation.mp. or exp Patient Isolation/  
8  
9 2. exp Cross Infection/ or contact isolation.mp.  
10  
11 3. respiratory isolation.mp.  
12  
13 4. source isolation.mp.  
14  
15 5. contact isolation.mp.  
16  
17 6. droplet precautions.mp.  
18  
19 7. airborne precautions.mp.  
20  
21 8. contact precautions.mp.  
22  
23 9. cubicle.mp.  
24  
25 10. mrsa.mp. or exp Methicillin-Resistant Staphylococcus aureus/  
26  
27 11. 1 or 2 or 3 or 4 or 5 or 6 or 7 or 8 or 9 or 10  
28  
29 12. patient safety.mp. or exp Patient Safety/  
30  
31 13. patient harm.mp. or exp Patient Harm/  
32  
33 14. depression.mp. or exp DEPRESSION/  
34  
35 15. exp ANXIETY/ or anxiety.mp.  
36  
37 16. adaptation.mp. or exp ADAPTATION, PSYCHOLOGICAL/  
38  
39 17. exp STRESS, PSYCHOLOGICAL/ or stress.mp.  
40  
41 18. patient satisfaction.mp. or exp Patient Satisfaction/  
42  
43 19. quality of life.mp. or exp "Quality of Life"/  
44  
45 20. 12 or 13 or 14 or 15 or 16 or 17 or 18 or 19 or 20  
46  
47 21. 11 and 20  
48  
49  
50  
51  
52  
53  
54  
55  
56  
57  
58  
59  
60

**Characteristics of studies**

| Reference            | Study type                                                                                                                                                                   | Isolated                                                                                                                                                          | Non isolated                                                                                                                                      |
|----------------------|------------------------------------------------------------------------------------------------------------------------------------------------------------------------------|-------------------------------------------------------------------------------------------------------------------------------------------------------------------|---------------------------------------------------------------------------------------------------------------------------------------------------|
| Colorado (2014)      | Retrospective matched case control study.<br>Rehabilitation facility- tertiary centre<br>United States<br>July 2009 to December 2010                                         | N20<br>Patients in contact isolation                                                                                                                              | N=20<br>Matched to patients not in contact isolation based on age, rehabilitation diagnosis, and type of insurance                                |
| Croft (2015)         | Prospective cohort<br>Medical or surgical inpatients admitted to non-intensive care unit hospital wards, United States.<br>January to November 2010.                         | N=148<br>Patients on contact precautions<br>Age: 52 (13.8)<br>% male: 53.4                                                                                        | N=148<br>Individually matched by after an initial 3-day length of stay to patients not on contact precautions.<br>Age 52.3 (14.6)<br>% male: 46.6 |
| Dashiell-Earp (2014) | Collected real-time data on the location of 15 internal medicine interns, United States.<br>October 1, 2012 to December 31, 2012                                             | 1156 encounters                                                                                                                                                   | 2467 encounters                                                                                                                                   |
| Day (2011)           | Patients admitted to the general acute care units, United States.<br>June 1, 2009 to October 30, 2009                                                                        | N=20<br>Age: 68.5 (14.7)<br>% male: 85.0                                                                                                                          | N=83<br>Age: 63.9 (12.6)<br>% male: 95.2                                                                                                          |
| Day (2011)           | A two-year retrospective cohort<br>Tertiary care, United States..<br>All general inpatients over 18 years hospitalized for >24 h<br>February 1, 2007 to January 31, 2009.    | Contact precautions private room when possible, can be cohorted<br>General N = 3138<br>Age: 51.2 (17.5) % male 58.9<br>ITU N=1694<br>Age: 54.9 (17.5) % male 61.0 | General N = 25 426<br>Age: 49.6 (19.0) % male 46.3%<br>ICU N = 5 854<br>Age: 56.0 (17.7)<br>% male 59.7                                           |
| Day (2012)           | 2-year retrospective cohort study of all non-psychiatric hospital admissions >18 years, United States.<br>February 1, 2007 to January 31, 2009                               | N = 9 684<br>Contact precautions as above<br>Mean age: 50.1 (18.8) % male 51.4                                                                                    | N = 50 458<br>Mean age: 52.3 (16.9)<br>% males 59.1                                                                                               |
| Day (2013)           | Longitudinal frequency-matched cohort study of patients admitted to general medical and surgical units, United States. Day 0, day 3 then weekly.<br>January to November 2010 | N = 148<br>Mean age: 52.0 (13.9)<br>% male 58.1                                                                                                                   | N = 148<br>Mean age: 52.3 (14.6)<br>% male 50.7                                                                                                   |



|                                        |                          |                                                                                                                                                                  |                                                                                                                   |                                                                                                                      |
|----------------------------------------|--------------------------|------------------------------------------------------------------------------------------------------------------------------------------------------------------|-------------------------------------------------------------------------------------------------------------------|----------------------------------------------------------------------------------------------------------------------|
| 1<br>2<br>3<br>4<br>5                  | Evans (2003)             | Prospective observation; survey; retrospective review, United States. Tertiary care. June and July 2001                                                          | N 48<br>Mean age: 47.8 (2)<br>% male 85%                                                                          | N = 48<br>Mean age: 58.3 (2.4)<br>% male 75%                                                                         |
| 6<br>7<br>8<br>9<br>10                 | Findink (2012)           | Non-random quasi-experiment, Turkey<br>Age 18 to 65 Administered day 5<br>January 1, 2009 to December 31, 2009                                                   | N = 60<br>Mean age: 53.95 (18.4)<br>% male 75%                                                                    | N = 57<br>Mean age: 56.14 (17.1)<br>% male 76.3%                                                                     |
| 11<br>12<br>13<br>14<br>15<br>16<br>17 | Gammon (1998)            | Quasi experiment<br>Selected if last two numbers on their case notes even.<br>Two large District General Hospitals and one elderly care hospital, United Kingdom | N = 20<br>Placed in isolation for a minimum of 7days<br>Mean age: 61 years<br>% male: 65                          | N = 20<br>Mean age: 52 years<br>% male: 55                                                                           |
| 18<br>19<br>20<br>21<br>22<br>23       | Gandra (2014)            | Retrospective hospital-wide cohort study, United States. All patients admitted to medical-surgical inpatient units<br>November 1, 2009 to October 31, 2011       | Falls N=77<br>Mean age: 66.1 (14.3)<br>% male: 61%<br>Pressure ulcers N=82<br>Mean age: 64.5 (15.5)<br>% male: 63 | Falls N=82<br>Mean age: 63.7 (15.8)<br>% male: 51 (62%)<br>Pressure ulcers N=71<br>Mean age: 65.7 (15)<br>% male: 57 |
| 24<br>25<br>26<br>27<br>28             | Guilley-Lerondeau (2017) | Matched cohort study with prospective inclusions<br>Interview 3 days after commencing<br>General sample. France<br>March to July 2012                            | N=30<br>First prescription of isolation precaution<br>Median age (range) 69 (32 to 91)<br>% male 47               | N=60<br>Median age (range) 64 (24 to 91)<br>% male 53                                                                |
| 29<br>30<br>31<br>32<br>33             | Kennedy (1997)           | Cross-sectional matched-control study, United Kingdom.<br>May 1994 to November 1996                                                                              | N = 16<br>Isolated as a result of being MRSA<br>Mean age: 31.1<br>All male                                        | N = 16<br>Matched for age, sex, level of injury, and time since admission or injury                                  |
| 34<br>35                               | Kirkland (1999)          | Observational study - 7 months<br>Medical intensive-care, United States                                                                                          | N=14                                                                                                              | N=21                                                                                                                 |
| 36<br>37<br>38<br>39                   | Lau (2016)               | Prospective cohort study.<br>Adult patients discharged from internal medicine wards, Canada<br>October 2013 to November 2014,                                    | N=75<br>Mean age 60.35 (17.83)<br>% male 59                                                                       | N=420<br>Mean age 63.31 (18.69)<br>% male 48%                                                                        |
| 40<br>41<br>42<br>43                   | Livorsi (2015)           | Case-control study<br>Retrospective January 1, 2012 to                                                                                                           | N = 70<br>On contact precautions for MRSA throughout                                                              | N = 139<br>No significant differences between isolated and                                                           |

1  
2  
3  
4  
5  
6  
7  
8  
9  
10  
11  
12  
13  
14  
15  
16  
17  
18  
19  
20  
21  
22  
23  
24  
25  
26  
27  
28  
29  
30  
31  
32  
33  
34  
35  
36  
37  
38  
39  
40  
41  
42  
43  
44  
45  
46  
47

|                       |                                                                                                                                                      |                                                                                                                                                                                                    |                                                                                       |
|-----------------------|------------------------------------------------------------------------------------------------------------------------------------------------------|----------------------------------------------------------------------------------------------------------------------------------------------------------------------------------------------------|---------------------------------------------------------------------------------------|
|                       | May 31, 2012/prospective June 1, 2012 to March 31, 2013<br>'safety-net facility', United States                                                      | their hospital stay. Found to be MRSA positive during a previous hospitalization or as an outpatient, not current case                                                                             | non-isolated patients                                                                 |
| Lupi3n-Mendoza (2015) | Matched case-control study<br>Tertiary hospital, Spain<br>2011 and 2012                                                                              | N = 72<br>Adult patients admitted in isolation for =>5 days.<br>Median age (range) 62 (21-93)<br>% male 73%                                                                                        | N = 72<br>Median age (range) 69 (23-89),<br>% male 68.1%                              |
| Massee (2013)         | Retrospective case-control<br>Tertiary care, Canada                                                                                                  | N = 111<br>Matched MRSA patients with an admission diagnosis of heart failure or COPD to similar non-isolated controls<br>Median age (IQR) 80.0 (69.0-86.0)<br>% male 60.4%                        | N = 111<br>Median age (IQR) 80.0 (68.0-86.0)<br>% male 60.4%                          |
| Mehrotra (2013)       | Prospective cohort<br>Admission and on days 3, 7, 14<br>Tertiary centre, United States                                                               | N = 238<br>Segregation into a private or cohorted room<br>Mean age (SD) 52.4 (13.4)<br>% male 55.7                                                                                                 | N = 290<br>Mean age (SD) 52.9 (14.8)<br>% male 48                                     |
| Saint (2003)          | Prospective cohort study<br>2 university-affiliated medical centers, United States.<br>October 1999 to March 2000                                    | N=31                                                                                                                                                                                               | N=108                                                                                 |
| Soon (2013)           | Cross-sectional survey of cases and matched controls<br>Teaching hospital Singapore<br>June and August 2011                                          | N=20<br>Contact isolation in a cohort cubicle for the first time because of colonization or infection with a MDRO for at least 3 days<br>No statistically significant differences in age or gender | N=20                                                                                  |
| Spense (2011)         | Retrospective evaluation of incident reports<br>All patients admitted to acute care facility, United States<br>January 1, 2008 to December 31, 2008. | N=45                                                                                                                                                                                               | N=256                                                                                 |
| Stelfox (2003)        | Case control study<br>Consecutive adults isolated for at least 2 days with MRSA. Canada and United States<br>Controls patients admitted before       | General N = 78<br>Age: 69.6 (17.1)<br>% male: 45%<br>CHF N = 72<br>Age: 66.9 (14.7)                                                                                                                | General N = 156<br>Age: 65.4 (18.2)<br>% male: 51%<br>CHF N = 144<br>Age: 66.0 (14.5) |

|                   |                                                                                                                              |                                                                                                                     |                                                                         |
|-------------------|------------------------------------------------------------------------------------------------------------------------------|---------------------------------------------------------------------------------------------------------------------|-------------------------------------------------------------------------|
|                   | and after.<br>January 1, 1999, to January 1, 2000                                                                            | % male: 58                                                                                                          | % male: 54                                                              |
| Tarzi (2001)      | Cross-sectional matched case-control study<br>Care of the elderly rehabilitation wards, UK                                   | N = 22<br>Had been in isolation for at least two weeks with MRSA<br>Mean age (SD) 80 (8.4)<br>% male 27.3           | N = 20<br>Mean age (SD) 81 (9.1)<br>% male 33.3                         |
| Tran (2017)       | Propensity matched cohort study.<br>General internal medicine services, 3 hospitals, Canada<br>January 2010 to December 2012 | MRSA<br>Age: 69<br>% male 57%<br>Respiratory<br>Age: 71.7<br>% male: 53<br>Isolated for MRSA or respiratory illness | MRSA<br>Age: 69<br>% male 58%<br>Respiratory<br>Age: 70.6<br>% male: 55 |
| Wassenburg (2010) | Cross-sectional matched cohort study<br>Single university hospital,<br>Netherlands<br>November 2006 to February 2007         | N = 42<br>Age: 52 (19)<br>% male: 52                                                                                | N = 84<br>Age: 55 (16)<br>% male: 55                                    |

1  
2  
3  
4  
5  
6  
7  
8  
9  
10  
11  
12  
13  
14  
15  
16  
17  
18  
19  
20  
21  
22  
23  
24  
25  
26  
27  
28  
29  
30  
31  
32  
33  
34  
35  
36  
37  
38  
39  
40  
41  
42  
43  
44  
45  
46  
47

Excluded papers

| Reference             | Reason for exclusion         |
|-----------------------|------------------------------|
| Chittick et al (2016) | No comparative data          |
| Godsell (2013)        | Focussed on HCP              |
| Jeong (2016)          | MERS                         |
| MacKellaig (1986)     | Qualitative                  |
| Madsden (2015)        | Qualitative                  |
| Maunder (2003)        | SARS                         |
| Moran (2009)          | Focus on family centred care |
| Morgan (2011)         | Focus on process measures    |
| Rees (2000a)          | No comparative data          |
| Rees (2000a)          | No comparative data          |
| Simon (2016)          | Before and after             |
| Wilkins (1988)        | No comparative data          |



## PRISMA 2009 Flow Diagram

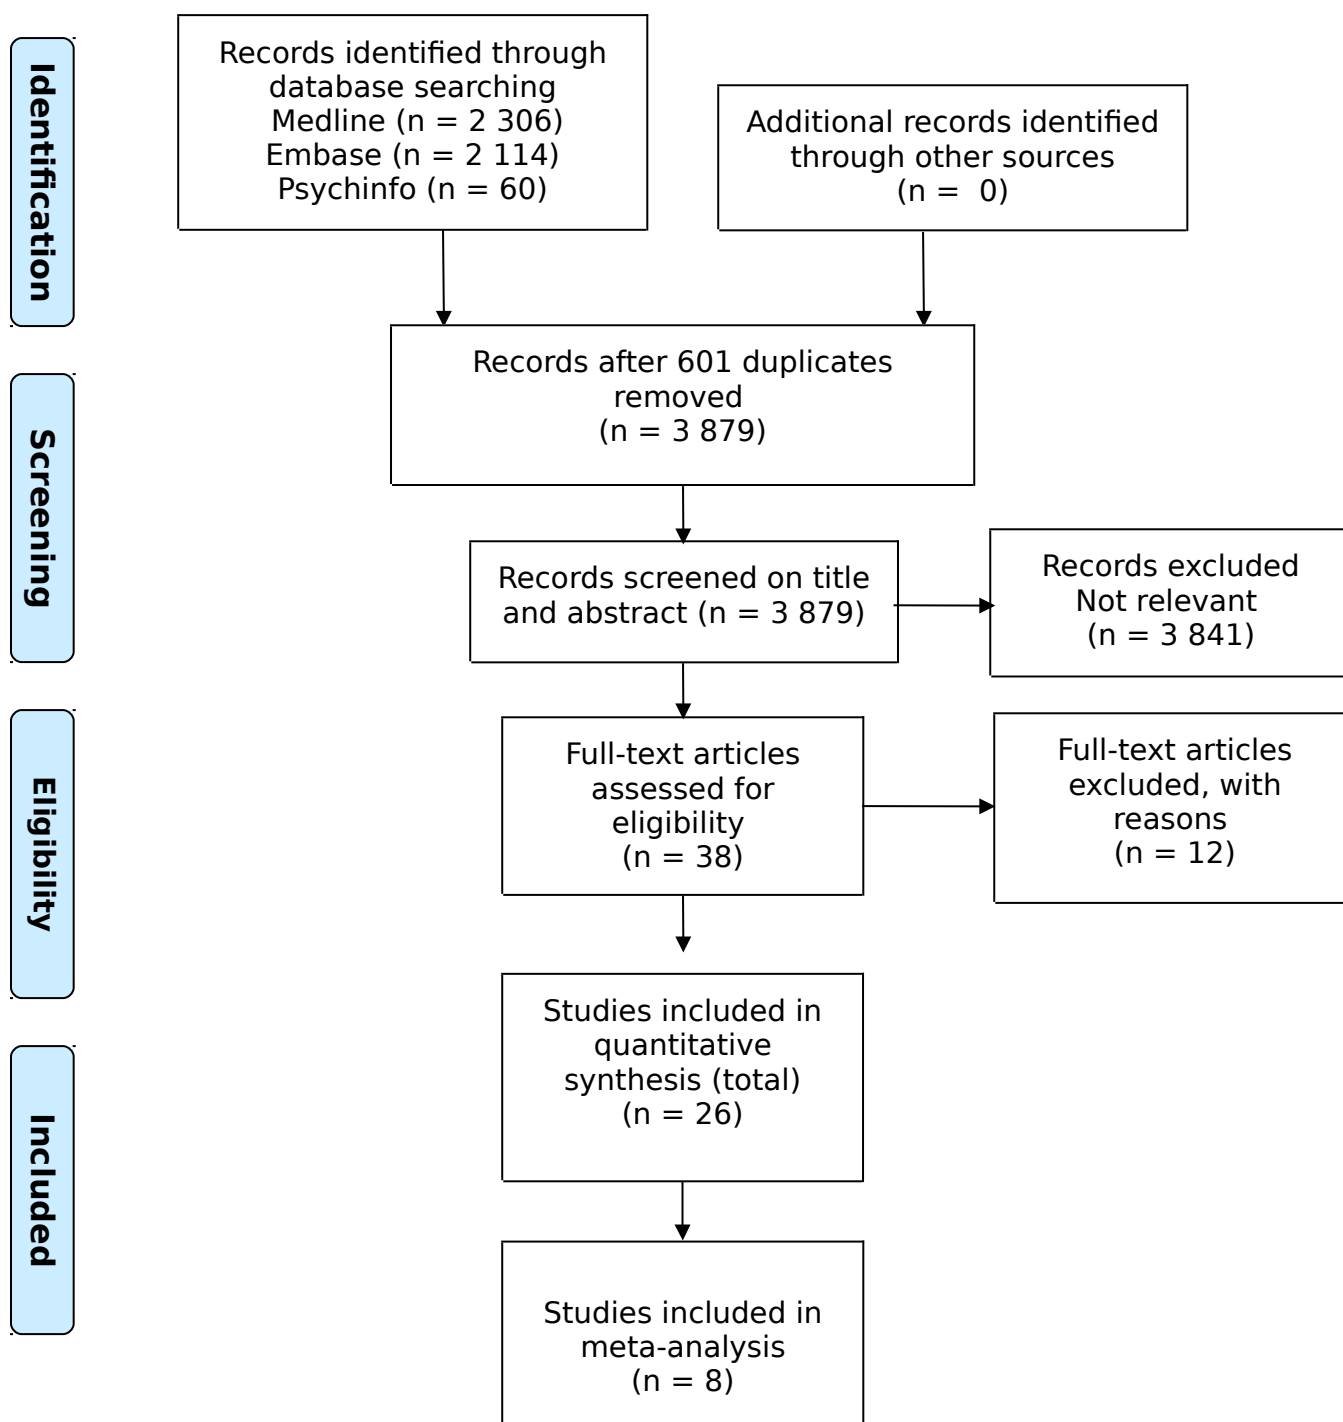

56 From: Moher D, Liberati A, Tetzlaff J, Altman DG, The PRISMA Group (2009). Preferred Reporting Items for Systematic Reviews and Meta-Analyses: The PRISMA Statement. PLoS Med 6(7): e1000097. doi:10.1371/journal.pmed1000097

58 **For more information, visit [www.prisma-statement.org](http://www.prisma-statement.org).**

59 For peer review only - <http://bmjopen.bmj.com/site/about/guidelines.xhtml>

60

## All RR data

|    | Reference                   | Year |
|----|-----------------------------|------|
| 1  |                             |      |
| 2  |                             |      |
| 3  |                             |      |
| 4  | 1 Croft(2015)               | 2015 |
| 5  | 2 Croft(2015)               | 2015 |
| 6  | 4 Croft(2015)               | 2015 |
| 7  | 9 Guilley-Lerondeau (2017)  | 2017 |
| 8  | 15 Lau (2016)               | 2016 |
| 9  | 16 Lau (2016)               | 2016 |
| 10 | 18 Lau (2016)               | 2016 |
| 11 | 43 Lupion-Mendoza (2015)    | 2015 |
| 12 | 48 Lupion-Mendoza (2015)    | 2015 |
| 13 | 50 Lupion-Mendoza (2015)    | 2015 |
| 14 | 54 Lupion-Mendoza (2015)    | 2015 |
| 15 | 57 Lupion-Mendoza (2015)    | 2015 |
| 16 | 58 Lupion-Mendoza (2015)    | 2015 |
| 17 | 59 Lupion-Mendoza (2015)    | 2015 |
| 18 | 69 Mehrotra (2013)          | 2013 |
| 19 | 71 Mehrotra (2013)          | 2013 |
| 20 | 76 Mehrotra (2013)          | 2013 |
| 21 | 77 Mehrotra (2013)          | 2013 |
| 22 | 85 Stelfox (2003)           | 2003 |
| 23 | 86 Stelfox (2003)           | 2003 |
| 24 | 87 Stelfox (2003)           | 2003 |
| 25 | 88 Stelfox (2003)           | 2003 |
| 26 | 89 Stelfox (2003)           | 2003 |
| 27 | 90 Stelfox (2003)           | 2003 |
| 28 | 91 Stelfox (2003)           | 2003 |
| 29 | 92 Stelfox (2003)           | 2003 |
| 30 | 93 Stelfox (2003)           | 2003 |
| 31 | 94 Stelfox (2003)           | 2003 |
| 32 | 95 Stelfox (2003)           | 2003 |
| 33 | 96 Spense (2011)            | 2011 |
| 34 | 97 Spense (2011)            | 2011 |
| 35 | 98 Spense (2011)            | 2011 |
| 36 | 99 Spense (2011)            | 2011 |
| 37 | 100 Spense (2011)           | 2011 |
| 38 | 102 Saint (2003)            | 2003 |
| 39 | 103 Tran (2016)             | 2016 |
| 40 | 106 Tran (2016)             | 2016 |
| 41 | 107 Tran (2016)             | 2016 |
| 42 | 108 Tran (2016)             | 2016 |
| 43 | 109 Tran (2016)             | 2016 |
| 44 | 113 Tran (2016)             | 2016 |
| 45 | 114 Tran (2016)             | 2016 |
| 46 | 116 Tran (2016)             | 2016 |
| 47 | 117 Tran (2016)             | 2016 |
| 48 | 118 Tran (2016)             | 2016 |
| 49 | 120 Tran (2016)             | 2016 |
| 50 | 122 Tran (2016)             | 2016 |
| 51 | 3 Croft(2015)               | 2015 |
| 52 | 5 Evans (2003)              | 2003 |
| 53 | 6 Evans (2003)              | 2003 |
| 54 | 7 Evans (2003)              | 2003 |
| 55 | 8 Guilley-Lerondeau (2017)  | 2017 |
| 56 | 10 Guilley-Lerondeau (2017) | 2017 |
| 57 | 11 Guilley-Lerondeau (2017) | 2017 |
| 58 |                             |      |
| 59 |                             |      |
| 60 |                             |      |

## All RR data

|    |                          |      |
|----|--------------------------|------|
| 12 | Guilley-Lerondeau (2017) | 2017 |
| 13 | Guilley-Lerondeau (2017) | 2017 |
| 14 | Guilley-Lerondeau (2017) | 2017 |
| 17 | Lau (2016)               | 2016 |
| 19 | Livorsi (2015)           | 2015 |
| 20 | Livorsi (2015)           | 2015 |
| 21 | Livorsi (2015)           | 2015 |
| 22 | Livorsi (2015)           | 2015 |
| 23 | Livorsi (2015)           | 2015 |
| 24 | Livorsi (2015)           | 2015 |
| 25 | Livorsi (2015)           | 2015 |
| 26 | Livorsi (2015)           | 2015 |
| 27 | Livorsi (2015)           | 2015 |
| 28 | Livorsi (2015)           | 2015 |
| 29 | Livorsi (2015)           | 2015 |
| 30 | Livorsi (2015)           | 2015 |
| 31 | Livorsi (2015)           | 2015 |
| 32 | Livorsi (2015)           | 2015 |
| 33 | Livorsi (2015)           | 2015 |
| 34 | Livorsi (2015)           | 2015 |
| 35 | Livorsi (2015)           | 2015 |
| 36 | Livorsi (2015)           | 2015 |
| 37 | Lupion-Mendoza (2015)    | 2015 |
| 38 | Lupion-Mendoza (2015)    | 2015 |
| 39 | Lupion-Mendoza (2015)    | 2015 |
| 40 | Lupion-Mendoza (2015)    | 2015 |
| 41 | Lupion-Mendoza (2015)    | 2015 |
| 42 | Lupion-Mendoza (2015)    | 2015 |
| 44 | Lupion-Mendoza (2015)    | 2015 |
| 45 | Lupion-Mendoza (2015)    | 2015 |
| 46 | Lupion-Mendoza (2015)    | 2015 |
| 47 | Lupion-Mendoza (2015)    | 2015 |
| 49 | Lupion-Mendoza (2015)    | 2015 |
| 51 | Lupion-Mendoza (2015)    | 2015 |
| 52 | Lupion-Mendoza (2015)    | 2015 |
| 53 | Lupion-Mendoza (2015)    | 2015 |
| 55 | Lupion-Mendoza (2015)    | 2015 |
| 56 | Lupion-Mendoza (2015)    | 2015 |
| 60 | Masse (2013)             | 2013 |
| 61 | Mehrotra (2013)          | 2013 |
| 62 | Mehrotra (2013)          | 2013 |
| 63 | Mehrotra (2013)          | 2013 |
| 64 | Mehrotra (2013)          | 2013 |
| 65 | Mehrotra (2013)          | 2013 |
| 66 | Mehrotra (2013)          | 2013 |
| 67 | Mehrotra (2013)          | 2013 |
| 68 | Mehrotra (2013)          | 2013 |
| 70 | Mehrotra (2013)          | 2013 |
| 72 | Mehrotra (2013)          | 2013 |
| 73 | Mehrotra (2013)          | 2013 |
| 74 | Mehrotra (2013)          | 2013 |
| 75 | Mehrotra (2013)          | 2013 |
| 78 | Mehrotra (2013)          | 2013 |
| 79 | Mehrotra (2013)          | 2013 |
| 80 | Mehrotra (2013)          | 2013 |

All RR data

|    |                    |      |
|----|--------------------|------|
| 1  |                    |      |
| 2  |                    |      |
| 3  |                    |      |
| 4  | 81 Mehrotra (2013) | 2013 |
| 5  | 82 Mehrotra (2013) | 2013 |
| 6  | 83 Mehrotra (2013) | 2013 |
| 7  | 84 Mehrotra (2013) | 2013 |
| 8  | 101 Saint (2003)   | 2003 |
| 9  | 104 Tran (2016)    | 2016 |
| 10 | 105 Tran (2016)    | 2016 |
| 11 | 110 Tran (2016)    | 2016 |
| 12 | 111 Tran (2016)    | 2016 |
| 13 | 112 Tran (2016)    | 2016 |
| 14 | 115 Tran (2016)    | 2016 |
| 15 | 119 Tran (2016)    | 2016 |
| 16 | 121 Tran (2016)    | 2016 |
| 17 | 123 Tran (2016)    | 2016 |
| 18 | 124 Tran (2016)    | 2016 |
| 19 | 125 Tran (2016)    | 2016 |
| 20 | 126 Tran (2016)    | 2016 |
| 21 | 127 Tran (2016)    | 2016 |
| 22 | 128 Tran (2016)    | 2016 |
| 23 |                    |      |
| 24 |                    |      |
| 25 |                    |      |
| 26 |                    |      |
| 27 |                    |      |
| 28 |                    |      |
| 29 |                    |      |
| 30 |                    |      |
| 31 |                    |      |
| 32 |                    |      |
| 33 |                    |      |
| 34 |                    |      |
| 35 |                    |      |
| 36 |                    |      |
| 37 |                    |      |
| 38 |                    |      |
| 39 |                    |      |
| 40 |                    |      |
| 41 |                    |      |
| 42 |                    |      |
| 43 |                    |      |
| 44 |                    |      |
| 45 |                    |      |
| 46 |                    |      |
| 47 |                    |      |
| 48 |                    |      |
| 49 |                    |      |
| 50 |                    |      |
| 51 |                    |      |
| 52 |                    |      |
| 53 |                    |      |
| 54 |                    |      |
| 55 |                    |      |
| 56 |                    |      |
| 57 |                    |      |
| 58 |                    |      |
| 59 |                    |      |
| 60 |                    |      |

For peer review only



## All RR data

| Outcome                                                          | Isolated |
|------------------------------------------------------------------|----------|
| All non infectious event                                         | 62       |
| Severe non infectitious event                                    | 20       |
| Infectious event                                                 | 6        |
| HCW help in AOL (very/satisfied)                                 | 24       |
| Readmission/death 30 days                                        | 15       |
| Readmission 30 days                                              | 15       |
| Death 30 days                                                    | 4        |
| The importance of hand hygiene was explained by staff            | 48       |
| The food tray was removed promptly after eating                  | 34       |
| The room atmosphere was sufficiently quiet                       | 70       |
| Blood pressure was recorded at least once daily, every day       | 43       |
| Any falls during present admission                               | 1        |
| Any new pressure ulcers during present admission                 | 2        |
| Any falls or pressure ulcers during present admission            | 3        |
| Received help after pressing call button                         | 17       |
| Top box for all staff responsiveness                             | 3        |
| Before giving new medicine, hospital staff describe side effects | 25       |
| Top box for all medication communication                         | 22       |
| Any complaint                                                    | 42       |
| Informal complaint                                               | 37       |
| Formal complaint                                                 | 12       |
| Any adverse event                                                | 108      |
| Non preventable adverse event                                    | 34       |
| Preventable adverse event                                        | 74       |
| Supportive care failure                                          | 38       |
| Diagnostic error                                                 | 9        |
| Operative error                                                  | 17       |
| Medical procedure error                                          | 13       |
| Drug related error                                               | 26       |
| Falls                                                            | 19       |
| Injury                                                           | 1        |
| IV related event                                                 | 3        |
| Medication related event                                         | 15       |
| Therapy related event                                            | 7        |
| Examined by attending physician                                  | 11       |
| Fall (MRSA)*                                                     | 10.3     |
| Treatment incident (MRSA)*                                       | 0.4      |
| Infection control incident (MRSA)*                               | 1.8      |
| Safety incident (MRSA)*                                          | 0.1      |
| Equipment incident (MRSA)*                                       | 0.5      |
| Medication incident (respiratory)*                               | 2.1      |
| Laboratory incident (respiratory)*                               | 0.9      |
| Infection control incident (respiratory)*                        | 1        |
| Safety incident (respiratory)*                                   | 0.3      |
| Equipment incident (respiratory)*                                | 0.4      |
| Patient complaints (respiratory)*                                | 2.6      |
| 30-day readmission (MRSA)                                        | 140      |
| Preventable non infectiouts event                                | 37       |
| Encounters per hr (no)                                           | 5        |
| ICU encounters per hr                                            | 6        |
| Floor encounters per hr                                          | 4        |
| Global hygiene (very/satisfied)                                  | 28       |
| Daily room cleaning (very/satisfied)                             | 27       |
| HCW availability (very/satisfied)                                | 25       |

|    |  |  |
|----|--|--|
| 1  |  |  |
| 2  |  |  |
| 3  |  |  |
| 4  |  |  |
| 5  |  |  |
| 6  |  |  |
| 7  |  |  |
| 8  |  |  |
| 9  |  |  |
| 10 |  |  |
| 11 |  |  |
| 12 |  |  |
| 13 |  |  |
| 14 |  |  |
| 15 |  |  |
| 16 |  |  |
| 17 |  |  |
| 18 |  |  |
| 19 |  |  |
| 20 |  |  |
| 21 |  |  |
| 22 |  |  |
| 23 |  |  |
| 24 |  |  |
| 25 |  |  |
| 26 |  |  |
| 27 |  |  |
| 28 |  |  |
| 29 |  |  |
| 30 |  |  |
| 31 |  |  |
| 32 |  |  |
| 33 |  |  |
| 34 |  |  |
| 35 |  |  |
| 36 |  |  |
| 37 |  |  |
| 38 |  |  |
| 39 |  |  |
| 40 |  |  |
| 41 |  |  |
| 42 |  |  |
| 43 |  |  |
| 44 |  |  |
| 45 |  |  |
| 46 |  |  |
| 47 |  |  |
| 48 |  |  |
| 49 |  |  |
| 50 |  |  |
| 51 |  |  |
| 52 |  |  |
| 53 |  |  |
| 54 |  |  |
| 55 |  |  |
| 56 |  |  |
| 57 |  |  |
| 58 |  |  |
| 59 |  |  |
| 60 |  |  |

## All RR data

|                                                                                        |    |
|----------------------------------------------------------------------------------------|----|
| Daily HCW presence (very/satisfied)                                                    | 27 |
| Human relation with HCW (very/satisfied)                                               | 27 |
| Global satisfaction (very/satisfied)                                                   | 25 |
| ED visit 30 days                                                                       | 22 |
| Overall rating of hospital =>9/10                                                      | 44 |
| Nurses treat you with courtesy and respect                                             | 51 |
| Nurses listen carefully                                                                | 47 |
| Nurses explain things in an understandable way                                         | 47 |
| Received help after pressing call button                                               | 28 |
| Doctors treat you with courtesy and respect                                            | 53 |
| Doctors listen carefully to you                                                        | 48 |
| Doctors explain things in an understandable way                                        | 50 |
| Room and bathroom kept clean                                                           | 42 |
| Room quiet at night                                                                    | 51 |
| Received help with bathroom/bedpan                                                     | 19 |
| Pain well controlled                                                                   | 34 |
| Hospital staff help with pain                                                          | 45 |
| Hospital staff explain new medications                                                 | 20 |
| Hospital staff describe side effects of medications                                    | 13 |
| Hospital staff discussed help after discharge                                          | 52 |
| Written information on problems to look for after discharge                            | 52 |
| Recommend hospital to friends and family                                               | 43 |
| Overall satisfaction with the professional treatment received from health care workers | 67 |
| Nurses treated the patients in polite and respectful manner (totally/partially agree)  | 70 |
| Physicians treated the patients in polite and respectful manner                        | 71 |
| Nurses provided clear information about the health problem                             | 64 |
| Physicians provided clear information about the health problem                         | 66 |
| Clear explanations were provided before all procedures                                 | 62 |
| Health care workers entered the room whenever the patient called them                  | 66 |
| Blood pressure and temperature recorded at least once a day                            | 65 |
| The physician visited daily                                                            | 69 |
| The room was comfortable                                                               | 62 |
| Room cleaning was satisfactory                                                         | 66 |
| I frequently felt lonely during admission                                              | 17 |
| Medical notes were recorded every day                                                  | 64 |
| Nurses notes were recorded every day                                                   | 64 |
| Daily temperature was recorded at least once a day, every day                          | 53 |
| Daily glycemc levels were recorded as indicated, everyday (only diabetic patients)     | 31 |
| Total number of complications                                                          | 60 |
| Nurses treat with courtesy and respect                                                 | 31 |
| Nurses listen carefully                                                                | 30 |
| Nurses explain things in understandable way                                            | 30 |
| Top box for all nursing communication                                                  | 27 |
| Doctors treat with courtesy and respect                                                | 33 |
| Doctors listen carefully                                                               | 31 |
| Doctors explain things in understandable way                                           | 29 |
| Top box for all doctor communication                                                   | 27 |
| Received help in bathroom/bedpan use                                                   | 25 |
| Pain well controlled                                                                   | 26 |
| Hospital staff help with pain                                                          | 26 |
| Top box for all pain management                                                        | 25 |
| Before giving new medicine, hospital staff tells what it is for                        | 30 |
| Spoken with about having necessary help after discharge                                | 31 |
| Written information on symptoms/problems to look for after discharge                   | 33 |
| Top box for all discharge information                                                  | 30 |

## All RR data

|    |                                                    |      |
|----|----------------------------------------------------|------|
| 1  |                                                    |      |
| 2  |                                                    |      |
| 3  |                                                    |      |
| 4  | Hospital room and bathroom kept clean (individual) | 27   |
| 5  | Area near room quiet at night (individual)         | 24   |
| 6  | Recommend hospital to friends and family (global)  | 25   |
| 7  | Overall hospital rating (global)                   | 22   |
| 8  | Examined by senior resident doctor                 | 26   |
| 9  | Medication incident (MRSA)*                        | 2.2  |
| 10 | Laboratory incident (MRSA)*                        | 0.3  |
| 11 | Any adverse event (MRSA)*                          | 12.4 |
| 12 | Patient complaints (MRSA)*                         | 1.1  |
| 13 | Fall (respiratory)*                                | 4.2  |
| 14 | Treatment incident (respiratory)*                  | 0.6  |
| 15 | Any adverse event (respiratory)*                   | 9.1  |
| 16 | Inpatient mortality (MRSA)                         | 59   |
| 17 | 30-day ED visit (MRSA)                             | 84   |
| 18 | Readmission or ED visit (respiratory)              | 167  |
| 19 | Inpatient mortality (respiratory)                  | 104  |
| 20 | 30-day readmission (respiratory)                   | 206  |
| 21 | 30-day ED visit (respiratory)                      | 164  |
| 22 | Readmission or ED visit (respiratory)              | 261  |
| 23 |                                                    |      |
| 24 |                                                    |      |
| 25 |                                                    |      |
| 26 |                                                    |      |
| 27 |                                                    |      |
| 28 |                                                    |      |
| 29 |                                                    |      |
| 30 |                                                    |      |
| 31 |                                                    |      |
| 32 |                                                    |      |
| 33 |                                                    |      |
| 34 |                                                    |      |
| 35 |                                                    |      |
| 36 |                                                    |      |
| 37 |                                                    |      |
| 38 |                                                    |      |
| 39 |                                                    |      |
| 40 |                                                    |      |
| 41 |                                                    |      |
| 42 |                                                    |      |
| 43 |                                                    |      |
| 44 |                                                    |      |
| 45 |                                                    |      |
| 46 |                                                    |      |
| 47 |                                                    |      |
| 48 |                                                    |      |
| 49 |                                                    |      |
| 50 |                                                    |      |
| 51 |                                                    |      |
| 52 |                                                    |      |
| 53 |                                                    |      |
| 54 |                                                    |      |
| 55 |                                                    |      |
| 56 |                                                    |      |
| 57 |                                                    |      |
| 58 |                                                    |      |
| 59 |                                                    |      |
| 60 |                                                    |      |

## All RR data

|    | Isolated.N | Control | Control.N | RI          | RC          | RR          | inout | Type         |
|----|------------|---------|-----------|-------------|-------------|-------------|-------|--------------|
| 1  |            |         |           |             |             |             |       |              |
| 2  |            |         |           |             |             |             |       |              |
| 3  |            |         |           |             |             |             |       |              |
| 4  | 148        | 84      | 148       | 0.418918919 | 0.567567568 | 0.738095238 | a     | AE           |
| 5  | 148        | 27      | 148       | 0.135135135 | 0.182432432 | 0.740740741 | a     | AE           |
| 6  | 148        | 10      | 148       | 0.040540541 | 0.067567568 | 0.6         | a     | AE           |
| 7  | 30         | 60      | 60        | 0.8         | 1           | 1.25        | a     | Satisfaction |
| 8  | 75         | 70      | 420       | 0.2         | 0.166666667 | 1.2         | a     | AE           |
| 9  | 75         | 66      | 420       | 0.2         | 0.157142857 | 1.272727273 | a     | AE           |
| 10 | 75         | 9       | 420       | 0.053333333 | 0.021428571 | 2.488888889 | a     | AE           |
| 11 | 72         | 18      | 72        | 0.666666667 | 0.25        | 0.375       | a     | Satisfaction |
| 12 | 72         | 63      | 72        | 0.472222222 | 0.875       | 1.852941177 | a     | Satisfaction |
| 13 | 72         | 54      | 72        | 0.972222222 | 0.75        | 0.771428572 | a     | Satisfaction |
| 14 | 72         | 61      | 72        | 0.597222222 | 0.847222222 | 0.704918033 | a     | Quality      |
| 15 | 72         | 0       | 72        | 0.013888889 | 0           | #DIV/0!     | a     | AE           |
| 16 | 72         | 0       | 72        | 0.027777778 | 0           | #DIV/0!     | a     | AE           |
| 17 | 72         | 0       | 72        | 0.041666667 | 0           | #DIV/0!     | a     | AE           |
| 18 | 37         | 33      | 51        | 0.459459459 | 0.647058824 | 1.408304501 | a     | Quality      |
| 19 | 37         | 14      | 51        | 0.081081081 | 0.274509804 | 3.385620919 | a     | Satisfaction |
| 20 | 37         | 20      | 51        | 0.675675676 | 0.392156863 | 0.580392157 | a     | Quality      |
| 21 | 37         | 20      | 51        | 0.594594595 | 0.392156863 | 0.659536542 | a     | Quality      |
| 22 | 150        | 13      | 300       | 0.28        | 0.043333333 | 6.461538462 | a     | Satisfaction |
| 23 | 150        | 10      | 300       | 0.246666667 | 0.033333333 | 7.4         | a     | Satisfaction |
| 24 | 150        | 3       | 300       | 0.08        | 0.01        | 8           | a     | Satisfaction |
| 25 | 150        | 53      | 300       | 0.72        | 0.176666667 | 4.075471698 | a     | Satisfaction |
| 26 | 150        | 39      | 300       | 0.226666667 | 0.13        | 1.743589744 | a     | AE           |
| 27 | 150        | 14      | 300       | 0.493333333 | 0.046666667 | 10.57142857 | a     | AE           |
| 28 | 150        | 5       | 300       | 0.253333333 | 0.016666667 | 15.2        | a     | AE           |
| 29 | 150        | 2       | 300       | 0.06        | 0.006666667 | 9           | a     | AE           |
| 30 | 150        | 20      | 300       | 0.113333333 | 0.066666667 | 1.7         | a     | AE           |
| 31 | 150        | 7       | 300       | 0.086666667 | 0.023333333 | 3.714285714 | a     | AE           |
| 32 | 150        | 19      | 300       | 0.173333333 | 0.063333333 | 2.736842105 | a     | AE           |
| 33 | 45         | 85      | 256       | 0.422222222 | 0.33203125  | 1.271633987 | a     | AE           |
| 34 | 45         | 19      | 256       | 0.022222222 | 0.07421875  | 0.299415205 | a     | AE           |
| 35 | 45         | 6       | 256       | 0.066666667 | 0.0234375   | 2.844444444 | a     | AE           |
| 36 | 45         | 122     | 256       | 0.333333333 | 0.4765625   | 0.699453552 | a     | AE           |
| 37 | 45         | 24      | 256       | 0.155555556 | 0.09375     | 1.659259259 | a     | AE           |
| 38 | 31         | 79      | 108       | 0.35483871  | 0.731481481 | 2.061447808 | a     | Quality      |
| 39 | 100        | 8       | 100       | 0.103       | 0.08        | 1.2875      | a     | AE           |
| 40 | 100        | 0.5     | 100       | 0.004       | 0.005       | 0.8         | a     | AE           |
| 41 | 100        | 0.1     | 100       | 0.018       | 0.0011      | 16.36363636 | a     | AE           |
| 42 | 100        | 0.3     | 100       | 0.001       | 0.003       | 0.333333333 | a     | AE           |
| 43 | 100        | 0.2     | 100       | 0.005       | 0.002       | 2.5         | a     | AE           |
| 44 | 100        | 1.6     | 100       | 0.021       | 0.016       | 1.3125      | a     | AE           |
| 45 | 100        | 0.6     | 100       | 0.009       | 0.006       | 1.5         | a     | AE           |
| 46 | 100        | 0.6     | 100       | 0.01        | 0.006       | 1.666666667 | a     | AE           |
| 47 | 100        | 0.1     | 100       | 0.003       | 0.001       | 3           | a     | AE           |
| 48 | 100        | 0.2     | 100       | 0.004       | 0.002       | 2           | a     | AE           |
| 49 | 100        | 1       | 100       | 0.026       | 0.01        | 2.6         | a     | Satisfaction |
| 50 | 737        | 108     | 737       | 0.19        | 0.147       | 1.292517007 | a     | AE           |
| 51 | 148        | 41      | 148       | 0.25        | 0.277027027 | 0.902439024 | b     | AE           |
| 52 | 485        | 11      | 1002      | 0.010309278 | 0.010978044 | 1.064870304 | b     | Quality      |
| 53 | 319        | 14      | 658       | 0.018808777 | 0.021276596 | 1.131205713 | b     | Quality      |
| 54 | 166        | 8       | 344       | 0.024096386 | 0.023255814 | 0.965116263 | b     | Quality      |
| 55 | 30         | 59      | 60        | 0.933333333 | 0.983333333 | 1.053571429 | b     | Satisfaction |
| 56 | 30         | 58      | 60        | 0.9         | 0.966666667 | 1.074074074 | b     | Satisfaction |
| 57 | 30         | 57      | 60        | 0.833333333 | 0.95        | 1.14        | b     | Satisfaction |
| 58 |            |         |           |             |             |             |       |              |
| 59 |            |         |           |             |             |             |       |              |
| 60 |            |         |           |             |             |             |       |              |

All RR data

|    |     |     |     |             |             |             |   |              |  |
|----|-----|-----|-----|-------------|-------------|-------------|---|--------------|--|
| 1  |     |     |     |             |             |             |   |              |  |
| 2  |     |     |     |             |             |             |   |              |  |
| 3  |     |     |     |             |             |             |   |              |  |
| 4  | 30  | 59  | 60  | 0.9         | 0.983333333 | 1.092592592 | b | Satisfaction |  |
| 5  | 30  | 60  | 60  | 0.9         | 1           | 1.111111111 | b | Satisfaction |  |
| 6  | 30  | 60  | 60  | 0.833333333 | 1           | 1.2         | b | Satisfaction |  |
| 7  | 75  | 109 | 420 | 0.293333333 | 0.25952381  | 1.130275229 | b | AE           |  |
| 8  | 68  | 85  | 135 | 0.647058824 | 0.62962963  | 0.973063973 | b | Satisfaction |  |
| 9  | 69  | 110 | 138 | 0.739130435 | 0.797101449 | 1.078431372 | b | Satisfaction |  |
| 10 | 70  | 101 | 137 | 0.671428571 | 0.737226277 | 1.097996583 | b | Satisfaction |  |
| 11 | 69  | 102 | 135 | 0.68115942  | 0.755555556 | 1.109219859 | b | Satisfaction |  |
| 12 | 52  | 70  | 114 | 0.538461538 | 0.614035088 | 1.140350879 | b | Satisfaction |  |
| 13 | 70  | 106 | 137 | 0.757142857 | 0.773722628 | 1.021897811 | b | Satisfaction |  |
| 14 | 68  | 103 | 136 | 0.705882353 | 0.757352941 | 1.072916666 | b | Satisfaction |  |
| 15 | 68  | 99  | 137 | 0.735294118 | 0.722627737 | 0.982773722 | b | Satisfaction |  |
| 16 | 68  | 82  | 127 | 0.617647059 | 0.645669291 | 1.045369328 | b | Satisfaction |  |
| 17 | 70  | 98  | 137 | 0.728571429 | 0.715328467 | 0.981823386 | b | Satisfaction |  |
| 18 | 30  | 49  | 68  | 0.633333333 | 0.720588235 | 1.137770898 | b | Satisfaction |  |
| 19 | 62  | 75  | 117 | 0.548387097 | 0.641025641 | 1.16892911  | b | Satisfaction |  |
| 20 | 62  | 96  | 115 | 0.725806452 | 0.834782609 | 1.150144927 | b | Satisfaction |  |
| 21 | 27  | 47  | 59  | 0.740740741 | 0.796610169 | 1.075423728 | b | Satisfaction |  |
| 22 | 25  | 35  | 57  | 0.52        | 0.614035088 | 1.180836708 | b | Satisfaction |  |
| 23 | 61  | 108 | 124 | 0.852459016 | 0.870967742 | 1.021712159 | b | Satisfaction |  |
| 24 | 62  | 106 | 120 | 0.838709677 | 0.883333333 | 1.053205128 | b | Satisfaction |  |
| 25 | 67  | 98  | 133 | 0.641791045 | 0.736842105 | 1.148102814 | b | Satisfaction |  |
| 26 | 72  | 69  | 72  | 0.930555556 | 0.958333333 | 1.029850745 | b | Satisfaction |  |
| 27 | 72  | 71  | 72  | 0.972222222 | 0.986111111 | 1.014285714 | b | Satisfaction |  |
| 28 | 72  | 72  | 72  | 0.986111111 | 1           | 1.014084507 | b | Satisfaction |  |
| 29 | 72  | 68  | 72  | 0.888888889 | 0.944444444 | 1.062499999 | b | Satisfaction |  |
| 30 | 72  | 62  | 72  | 0.916666667 | 0.861111111 | 0.939393939 | b | Satisfaction |  |
| 31 | 72  | 66  | 72  | 0.861111111 | 0.916666667 | 1.06451613  | b | Satisfaction |  |
| 32 | 72  | 71  | 72  | 0.916666667 | 0.986111111 | 1.075757575 | b | Satisfaction |  |
| 33 | 72  | 70  | 72  | 0.902777778 | 0.972222222 | 1.076923076 | b | Quality      |  |
| 34 | 72  | 71  | 72  | 0.958333333 | 0.986111111 | 1.028985507 | b | Quality      |  |
| 35 | 72  | 67  | 72  | 0.861111111 | 0.930555556 | 1.080645162 | b | Satisfaction |  |
| 36 | 72  | 70  | 72  | 0.916666667 | 0.972222222 | 1.06060606  | b | Quality      |  |
| 37 | 72  | 17  | 72  | 0.236111111 | 0.236111111 | 1           | b | Satisfaction |  |
| 38 | 72  | 65  | 72  | 0.888888889 | 0.902777778 | 1.015625    | b | Quality      |  |
| 39 | 72  | 69  | 72  | 0.888888889 | 0.958333333 | 1.078124999 | b | Quality      |  |
| 40 | 72  | 60  | 72  | 0.736111111 | 0.833333333 | 1.132075471 | b | Quality      |  |
| 41 | 31  | 18  | 18  | 1           | 1           | 1           | b | Quality      |  |
| 42 | 111 | 62  | 111 | 0.540540541 | 0.558558559 | 0.967741935 | b | Satisfaction |  |
| 43 | 37  | 45  | 51  | 0.837837838 | 0.882352941 | 1.053130929 | b | Satisfaction |  |
| 44 | 37  | 43  | 51  | 0.810810811 | 0.843137255 | 1.039869281 | b | Satisfaction |  |
| 45 | 37  | 42  | 51  | 0.810810811 | 0.823529412 | 1.015686275 | b | Satisfaction |  |
| 46 | 37  | 39  | 51  | 0.72972973  | 0.764705882 | 1.047930282 | b | Satisfaction |  |
| 47 | 37  | 42  | 51  | 0.891891892 | 0.823529412 | 0.923351159 | b | Satisfaction |  |
| 48 | 37  | 42  | 51  | 0.837837838 | 0.823529412 | 0.982922201 | b | Satisfaction |  |
| 49 | 37  | 44  | 51  | 0.783783784 | 0.862745098 | 1.100743745 | b | Satisfaction |  |
| 50 | 37  | 37  | 51  | 0.72972973  | 0.725490196 | 0.994190268 | b | Satisfaction |  |
| 51 | 37  | 35  | 51  | 0.675675676 | 0.68627451  | 1.015686274 | b | Quality      |  |
| 52 | 37  | 40  | 51  | 0.702702703 | 0.784313725 | 1.116138762 | b | Quality      |  |
| 53 | 37  | 38  | 51  | 0.702702703 | 0.745098039 | 1.060331824 | b | Quality      |  |
| 54 | 37  | 35  | 51  | 0.675675676 | 0.68627451  | 1.015686274 | b | Quality      |  |
| 55 | 37  | 41  | 51  | 0.810810811 | 0.803921569 | 0.991503268 | b | Quality      |  |
| 56 | 37  | 45  | 51  | 0.837837838 | 0.882352941 | 1.053130929 | b | Quality      |  |
| 57 | 37  | 49  | 51  | 0.891891892 | 0.960784314 | 1.077243019 | b | Quality      |  |
| 58 | 37  | 45  | 51  | 0.810810811 | 0.882352941 | 1.088235294 | b | Quality      |  |
| 59 |     |     |     |             |             |             |   |              |  |
| 60 |     |     |     |             |             |             |   |              |  |

## All RR data

|    |      |      |      |             |             |             |   |              |
|----|------|------|------|-------------|-------------|-------------|---|--------------|
| 1  |      |      |      |             |             |             |   |              |
| 2  |      |      |      |             |             |             |   |              |
| 3  |      |      |      |             |             |             |   |              |
| 4  | 37   | 37   | 51   | 0.72972973  | 0.725490196 | 0.994190268 | b | Quality      |
| 5  | 37   | 32   | 51   | 0.648648649 | 0.62745098  | 0.96732026  | b | Satisfaction |
| 6  | 37   | 41   | 51   | 0.675675676 | 0.803921569 | 1.189803922 | b | Satisfaction |
| 7  | 37   | 36   | 51   | 0.594594595 | 0.705882353 | 1.187165775 | b | Satisfaction |
| 8  | 31   | 94   | 108  | 0.838709677 | 0.87037037  | 1.037749288 | b | Quality      |
| 9  | 100  | 2.4  | 100  | 0.022       | 0.024       | 0.916666667 | b | AE           |
| 10 | 100  | 0.3  | 100  | 0.0027      | 0.0033      | 0.818181818 | b | AE           |
| 11 | 100  | 10.7 | 100  | 0.124       | 0.107       | 1.158878505 | b | AE           |
| 12 | 100  | 1.3  | 100  | 0.0109      | 0.0125      | 0.872       | b | Satisfaction |
| 13 | 100  | 5.1  | 100  | 0.042       | 0.051       | 0.823529412 | b | AE           |
| 14 | 100  | 0.7  | 100  | 0.006       | 0.007       | 0.857142857 | b | AE           |
| 15 | 100  | 8.9  | 100  | 0.091       | 0.089       | 1.02247191  | b | AE           |
| 16 | 737  | 52   | 737  | 0.08        | 0.07        | 1.142857143 | b | AE           |
| 17 | 737  | 86   | 737  | 0.114       | 0.117       | 0.974358974 | b | AE           |
| 18 | 737  | 142  | 737  | 0.227       | 0.193       | 1.176165803 | b | AE           |
| 19 | 1502 | 128  | 1502 | 0.069       | 0.085       | 0.811764706 | b | AE           |
| 20 | 1502 | 236  | 1502 | 0.137       | 0.157       | 0.872611465 | b | AE           |
| 21 | 1502 | 168  | 1502 | 0.109       | 0.112       | 0.973214286 | b | AE           |
| 22 | 1502 | 278  | 1502 | 0.174       | 0.185       | 0.940540541 | b | AE           |
| 23 |      |      |      |             |             |             |   |              |
| 24 |      |      |      |             |             |             |   |              |
| 25 |      |      |      |             |             |             |   |              |
| 26 |      |      |      |             |             |             |   |              |
| 27 |      |      |      |             |             |             |   |              |
| 28 |      |      |      |             |             |             |   |              |
| 29 |      |      |      |             |             |             |   |              |
| 30 |      |      |      |             |             |             |   |              |
| 31 |      |      |      |             |             |             |   |              |
| 32 |      |      |      |             |             |             |   |              |
| 33 |      |      |      |             |             |             |   |              |
| 34 |      |      |      |             |             |             |   |              |
| 35 |      |      |      |             |             |             |   |              |
| 36 |      |      |      |             |             |             |   |              |
| 37 |      |      |      |             |             |             |   |              |
| 38 |      |      |      |             |             |             |   |              |
| 39 |      |      |      |             |             |             |   |              |
| 40 |      |      |      |             |             |             |   |              |
| 41 |      |      |      |             |             |             |   |              |
| 42 |      |      |      |             |             |             |   |              |
| 43 |      |      |      |             |             |             |   |              |
| 44 |      |      |      |             |             |             |   |              |
| 45 |      |      |      |             |             |             |   |              |
| 46 |      |      |      |             |             |             |   |              |
| 47 |      |      |      |             |             |             |   |              |
| 48 |      |      |      |             |             |             |   |              |
| 49 |      |      |      |             |             |             |   |              |
| 50 |      |      |      |             |             |             |   |              |
| 51 |      |      |      |             |             |             |   |              |
| 52 |      |      |      |             |             |             |   |              |
| 53 |      |      |      |             |             |             |   |              |
| 54 |      |      |      |             |             |             |   |              |
| 55 |      |      |      |             |             |             |   |              |
| 56 |      |      |      |             |             |             |   |              |
| 57 |      |      |      |             |             |             |   |              |
| 58 |      |      |      |             |             |             |   |              |
| 59 |      |      |      |             |             |             |   |              |
| 60 |      |      |      |             |             |             |   |              |

## All RR data

|    | Good/bad | exp yi | yi    | vi           |             |
|----|----------|--------|-------|--------------|-------------|
| 1  |          |        |       |              |             |
| 2  |          |        |       |              |             |
| 3  |          |        |       |              |             |
| 4  | Good/bad | exp yi | yi    | vi           |             |
| 5  | Bad      |        | 0.74  | -0.303682414 | 0.014520281 |
| 6  | Bad      |        | 0.74  | -0.300104592 | 0.073523524 |
| 7  | Bad      |        | 0.60  | -0.510825624 | 0.253153153 |
| 8  | Good     |        | 0.80  | -0.227083588 | 0.008693745 |
| 9  | Bad      |        | 1.20  | 0.182321557  | 0.065238095 |
| 10 | Bad      |        | 1.27  | 0.241162057  | 0.066103896 |
| 11 | Bad      |        | 2.49  | 0.911836382  | 0.345396825 |
| 12 | Good     |        | 2.67  | 0.980829253  | 0.048611111 |
| 13 | Good     |        | 0.54  | -0.616774202 | 0.017507003 |
| 14 | Good     |        | 1.30  | 0.259511195  | 0.005026455 |
| 15 | Good     |        | 0.70  | -0.349673748 | 0.011871479 |
| 16 | Bad      |        | 3.00  | 1.098612289  | 2.639269406 |
| 17 | Bad      |        | 5.00  | 1.609437912  | 2.37260274  |
| 18 | Bad      |        | 7.00  | 1.945910149  | 2.258317025 |
| 19 | Good     |        | 0.71  | -0.342386497 | 0.04249169  |
| 20 | Good     |        | 0.30  | -1.219537321 | 0.358127035 |
| 21 | Good     |        | 1.72  | 0.544051271  | 0.04336513  |
| 22 | Good     |        | 1.52  | 0.4162179    | 0.048819675 |
| 23 | Bad      |        | 6.46  | 1.865867441  | 0.090732601 |
| 24 | Bad      |        | 7.40  | 2.00148      | 0.117027027 |
| 25 | Bad      |        | 8.00  | 2.079441542  | 0.406666667 |
| 26 | Bad      |        | 4.08  | 1.404986494  | 0.018127184 |
| 27 | Bad      |        | 1.74  | 0.555946059  | 0.04505279  |
| 28 | Bad      |        | 10.57 | 2.358154944  | 0.074942085 |
| 29 | Bad      |        | 15.20 | 2.721295428  | 0.216315789 |
| 30 | Bad      |        | 9.00  | 2.197224577  | 0.601111111 |
| 31 | Bad      |        | 1.70  | 0.530628251  | 0.098823529 |
| 32 | Bad      |        | 3.71  | 1.312186389  | 0.20978022  |
| 33 | Bad      |        | 2.74  | 1.006804739  | 0.081093117 |
| 34 | Bad      |        | 1.27  | 0.240302677  | 0.038267813 |
| 35 | Bad      |        | 0.30  | -1.205924024 | 1.026503107 |
| 36 | Bad      |        | 2.84  | 1.045367774  | 0.473871528 |
| 37 | Bad      |        | 0.70  | -0.357455889 | 0.048734916 |
| 38 | Bad      |        | 1.66  | 0.506371273  | 0.158395337 |
| 39 | Good     |        | 0.49  | -0.723408557 | 0.062049995 |
| 40 | Bad      |        | 1.29  | 0.252702354  | 0.202087379 |
| 41 | Bad      |        | 0.80  | -0.223143551 | 4.48        |
| 42 | Bad      |        | 18.00 | 2.890371758  | 10.53555556 |
| 43 | Bad      |        | 0.33  | -1.098612289 | 13.31333333 |
| 44 | Bad      |        | 2.50  | 0.916290732  | 6.98        |
| 45 | Bad      |        | 1.31  | 0.271933715  | 1.081190476 |
| 46 | Bad      |        | 1.50  | 0.405465108  | 2.757777778 |
| 47 | Bad      |        | 1.67  | 0.510825624  | 2.646666667 |
| 48 | Bad      |        | 3.00  | 1.098612289  | 13.31333333 |
| 49 | Bad      |        | 2.00  | 0.693147181  | 7.48        |
| 50 | Bad      |        | 2.60  | 0.955511445  | 1.364615385 |
| 51 | Bad      |        | 1.30  | 0.259511195  | 0.013688412 |
| 52 | Bad      |        | 0.90  | -0.102654154 | 0.037903757 |
| 53 | Good     |        | 0.94  | -0.06285297  | 0.287849231 |
| 54 | Good     |        | 0.88  | -0.123284032 | 0.233440685 |
| 55 | Good     |        | 1.04  | 0.035506688  | 0.366068927 |
| 56 | Good     |        | 0.95  | -0.052185753 | 0.002663438 |
| 57 | Good     |        | 0.93  | -0.071458964 | 0.004278416 |
| 58 | Good     |        | 0.88  | -0.131028262 | 0.00754386  |
| 59 | Good     |        |       |              |             |
| 60 |          |        |       |              |             |



1  
2  
3  
4  
5  
6  
7  
8  
9  
10  
11  
12  
13  
14  
15  
16  
17  
18  
19  
20  
21  
22  
23  
24  
25  
26  
27  
28  
29  
30  
31  
32  
33  
34  
35  
36  
37  
38  
39  
40  
41  
42  
43  
44  
45  
46  
47  
48  
49  
50  
51  
52  
53  
54  
55  
56  
57  
58  
59  
60

## All RR data

|      |      |              |             |
|------|------|--------------|-------------|
| Good | 0.92 | -0.088553397 | 0.00398619  |
| Good | 0.89 | -0.111570701 | 0.004241055 |
| Good | 0.83 | -0.187078253 | 0.007093105 |
| Bad  | 1.13 | 0.122461169  | 0.038914572 |
| Good | 1.03 | 0.027305451  | 0.012378689 |
| Good | 0.93 | -0.075507553 | 0.006959622 |
| Good | 0.91 | -0.093487231 | 0.009592601 |
| Good | 0.90 | -0.103656938 | 0.009180356 |
| Good | 0.88 | -0.131336002 | 0.021997301 |
| Good | 0.98 | -0.021661497 | 0.006716902 |
| Good | 0.93 | -0.070380797 | 0.008483248 |
| Good | 1.02 | 0.017376376  | 0.008095858 |
| Good | 0.96 | -0.044370248 | 0.013424748 |
| Good | 1.02 | 0.018343838  | 0.00822694  |
| Good | 0.88 | -0.129070995 | 0.025000527 |
| Good | 0.86 | -0.156088039 | 0.018069057 |
| Good | 0.87 | -0.139887958 | 0.007814204 |
| Good | 0.93 | -0.07271475  | 0.017290406 |
| Good | 0.85 | -0.166223261 | 0.047950646 |
| Good | 0.98 | -0.021479807 | 0.00403207  |
| Good | 0.95 | -0.051838018 | 0.004202366 |
| Good | 0.87 | -0.138110854 | 0.011015725 |
| Good | 0.97 | -0.029413885 | 0.001640349 |
| Good | 0.99 | -0.014184635 | 0.000592444 |
| Good | 0.99 | -0.013889112 | 0.000381857 |
| Good | 0.94 | -0.060624622 | 0.002553105 |
| Good | 1.06 | 0.062520357  | 0.00350277  |
| Good | 0.94 | -0.062520357 | 0.00350277  |
| Good | 0.93 | -0.073025135 | 0.001458244 |
| Good | 0.93 | -0.074107972 | 0.001892552 |
| Good | 0.97 | -0.028573372 | 0.000799483 |
| Good | 0.93 | -0.077558234 | 0.003276628 |
| Good | 0.94 | -0.0588405   | 0.001659452 |
| Bad  | 1.00 | 0            | 0.089869281 |
| Good | 0.98 | -0.015504187 | 0.003231838 |
| Good | 0.93 | -0.075223421 | 0.002339976 |
| Good | 0.88 | -0.124052649 | 0.007756813 |
| Good | 1.01 | 0.01091989   | 0.001918507 |
| Bad  | 0.97 | -0.032789823 | 0.014777681 |
| Good | 0.95 | -0.051767565 | 0.007845417 |
| Good | 0.96 | -0.039095014 | 0.009954277 |
| Good | 0.98 | -0.015564517 | 0.010507987 |
| Good | 0.95 | -0.04681706  | 0.016043193 |
| Good | 1.08 | 0.079745663  | 0.007477684 |
| Good | 1.02 | 0.017225306  | 0.009432718 |
| Good | 0.91 | -0.095986084 | 0.010575161 |
| Good | 1.01 | 0.005826673  | 0.017429194 |
| Good | 0.98 | -0.015564517 | 0.021936558 |
| Good | 0.90 | -0.109875196 | 0.016826668 |
| Good | 0.94 | -0.058581902 | 0.018142458 |
| Good | 0.98 | -0.015564517 | 0.021936558 |
| Good | 1.01 | 0.008533035  | 0.011088707 |
| Good | 0.95 | -0.051767565 | 0.007845417 |
| Good | 0.93 | -0.074405017 | 0.004076323 |
| Good | 0.92 | -0.084557388 | 0.008920685 |



## All RR data

|    |      |      |              |             |
|----|------|------|--------------|-------------|
| 3  | Good | 1.01 | 0.005826673  | 0.017429194 |
| 4  | Good | 1.03 | 0.033225648  | 0.026281797 |
| 5  | Good | 0.84 | -0.173788522 | 0.017755374 |
| 6  | Good | 0.84 | -0.171568765 | 0.026597453 |
| 7  | Good | 0.96 | -0.037054222 | 0.007582513 |
| 8  | Bad  | 0.92 | -0.087011377 | 0.851212121 |
| 9  | Bad  | 1.00 | 0            | 6.646666667 |
| 10 | Bad  | 1.16 | 0.147452731  | 0.154103105 |
| 11 | Bad  | 0.85 | -0.167054085 | 1.658321678 |
| 12 | Bad  | 0.82 | -0.194156014 | 0.414173669 |
| 13 | Bad  | 0.86 | -0.15415068  | 3.075238095 |
| 14 | Bad  | 1.02 | 0.022223137  | 0.20224966  |
| 15 | Bad  | 1.13 | 0.126293725  | 0.033466218 |
| 16 | Bad  | 0.98 | -0.023530497 | 0.020818965 |
| 17 | Bad  | 1.18 | 0.162166755  | 0.010316573 |
| 18 | Bad  | 0.81 | -0.207639365 | 0.016096327 |
| 19 | Bad  | 0.87 | -0.135955636 | 0.007760099 |
| 20 | Bad  | 0.98 | -0.024097552 | 0.010718384 |
| 21 | Bad  | 0.94 | -0.063100706 | 0.006096982 |

1  
2  
3  
4  
5  
6  
7  
8  
9  
10  
11  
12  
13  
14  
15  
16  
17  
18  
19  
20  
21  
22  
23  
24  
25  
26  
27  
28  
29  
30  
31  
32  
33  
34  
35  
36  
37  
38  
39  
40  
41  
42  
43  
44  
45  
46  
47  
48  
49  
50  
51  
52  
53  
54  
55  
56  
57  
58  
59  
60

| Reference      | Year | Outcome     | Isolated | IsolatedSD | Isolated.N | Control | ControlSD |
|----------------|------|-------------|----------|------------|------------|---------|-----------|
| 2 Kennedy (1   | 1997 | Anxiety     | 37.8     | 19.9       | 16         | 12.3    | 10.7      |
| 9 Gammon ('    | 1998 | Anxiety     | 12.75    | 2.43       | 20         | 8.15    | 3.17      |
| 15 Tarzi (2001 | 2001 | Anxiety     | 15       | 3          | 22         | 8.6     | 3         |
| 16 Day (2011a  | 2011 | Anxiety/Dep | 14.35    | 1.61       | 20         | 13      | 0.8       |
| 13 Findink (20 | 2012 | Anxiety     | 7.23     | 4.1        | 61         | 6.42    | 3.9       |
| Soon (2013     | 2013 | Anxiety     |          |            |            |         |           |
| 17 Lupion-Mer  | 2015 | Anxiety     | 8.2      | 0.48       | 72         | 6.9     | 0.41      |
| 8 Lau (2016)   | 2016 | Anxiety     | 1.48     | 1.72       | 75         | 1.7     | 1.8       |

For peer review only

| Control.N | yi      | vi     |
|-----------|---------|--------|
| 16        | 1.5558  | 0.1628 |
| 20        | 1.5963  | 0.1319 |
| 20        | 2.093   | 0.1476 |
| 83        | 1.3351  | 0.0707 |
| 57        | 0.201   | 0.0341 |
|           | 2.5649  | 0.986  |
| 72        | 2.8969  | 0.0569 |
| 421       | -0.1228 | 0.0157 |

For peer review only

| Reference      | Year | Outcome    | Isolated | IsolatedSD | Isolated.N | Control | ControlSD |
|----------------|------|------------|----------|------------|------------|---------|-----------|
| 1 Kennedy (1   | 1997 | Depression | 16.5     | 9.9        | 16         | 12.3    | 10.7      |
| 10 Gammon (    | 1998 | Depression | 12.45    | 2.21       | 20         | 7.3     | 2.05      |
| Tarzi (200     | 2001 | Depression |          |            |            |         |           |
| 16 Day (2011   | 2011 | Anxiety/De | 14.3     | 1.61       | 20         | 13      | 0.8       |
| 14 Findink (20 | 2012 | Depression | 8.83     | 4.7        | 61         | 7.89    | 4.9       |
| Soon (2013     | 2013 | Depression |          |            |            |         |           |
| 18 Lupion-Mer  | 2015 | Depression | 7.8      | 0.51       | 72         | 6.6     | 0.43      |
| 7 Lau (2016)   | 2016 | Depression | 6.89     | 4.92       | 75         | 7.35    | 5.92      |

For peer review only

| Control.N | yi     | vi    |
|-----------|--------|-------|
| 16        | 0.397  | 0.127 |
| 20        | 2.368  | 0.17  |
|           | 2.101  | 0.125 |
| 83        | 1.335  | 0.071 |
| 57        | 0.195  | 0.034 |
|           | 1.562  | 0.2   |
| 72        | 2.531  | 0.05  |
| 420       | -0.079 | 0.016 |

For peer review only

1  
2  
3  
4  
5  
6  
7  
8  
9  
10  
11  
12  
13  
14  
15  
16  
17  
18  
19  
20  
21  
22  
23  
24  
25  
26  
27  
28  
29  
30  
31  
32  
33  
34  
35  
36  
37  
38  
39  
40  
41  
42  
43  
44  
45  
46  
47  
48  
49  
50  
51  
52  
53  
54  
55  
56  
57  
58  
59  
60

**Case-control studies**

|                                                                                                                                                                                                                                                                          | Colorado (2014)                      | Kennedy (1997)                                                                                                | Livorsi (2015)                                                        | Lupion (2015)                                                         | Masse (2013)                     | Soon (2013)                                | Tarzi (2001)                                                                                          |
|--------------------------------------------------------------------------------------------------------------------------------------------------------------------------------------------------------------------------------------------------------------------------|--------------------------------------|---------------------------------------------------------------------------------------------------------------|-----------------------------------------------------------------------|-----------------------------------------------------------------------|----------------------------------|--------------------------------------------|-------------------------------------------------------------------------------------------------------|
| 1) <u>Is the case definition adequate?</u><br>a) yes, with independent validation *<br>b) yes, eg record linkage or based on self reports<br>c) no description                                                                                                           | *                                    | *                                                                                                             | *                                                                     | *                                                                     | *                                | *                                          | *                                                                                                     |
| 2) <u>Representativeness of the cases</u><br>a) consecutive or obviously representative series of cases *<br>b) potential for selection biases or not stated                                                                                                             | b                                    | b                                                                                                             | *                                                                     | b                                                                     | b                                | *                                          | *                                                                                                     |
| 3) <u>Selection of Controls</u><br>a) community controls (studies of hospital patients) *<br>b) hospital controls<br>c) no description                                                                                                                                   | *                                    | *                                                                                                             | *                                                                     | *                                                                     | *                                | *                                          | *                                                                                                     |
| 4) <u>Definition of Controls</u><br>a) no history of disease (endpoint) *<br>b) no description of source                                                                                                                                                                 | *                                    |                                                                                                               |                                                                       | *                                                                     |                                  |                                            |                                                                                                       |
| <b>Comparability</b>                                                                                                                                                                                                                                                     |                                      |                                                                                                               |                                                                       |                                                                       |                                  |                                            |                                                                                                       |
| 1) <u>Comparability of cases and controls on the basis of the design or analysis</u><br>a) study controls for diagnosis *<br>b) study controls for any additional factor *                                                                                               | *<br>* (l)                           | *<br>* (l, g)                                                                                                 |                                                                       | *<br>* (g)                                                            | *<br>* (g)                       | *<br>* (l, g)                              | *<br>* (l, g)                                                                                         |
| <b>Outcome</b>                                                                                                                                                                                                                                                           |                                      |                                                                                                               |                                                                       |                                                                       |                                  |                                            |                                                                                                       |
| 1) <u>Ascertainment of exposure</u><br>a) secure record (eg surgical records) *<br>b) structured interview where blind to case/control status *<br>c) interview not blinded to case/control status<br>d) written self report or medical record only<br>e) no description | *                                    | *                                                                                                             | *                                                                     | *                                                                     | *                                | *                                          | *                                                                                                     |
| 2) <u>Same method of ascertainment for cases and controls</u><br>a) yes *<br>b) no                                                                                                                                                                                       | Functional Independence Measure ## * | Functional Independence Measure; Beck Inventory Depression; State Anxiety Inventory; Profile Mood States ## * | Hospital Consumer Assessment of Healthcare Providers and Systems ## * | Hospital Consumer Assessment of Healthcare Providers and Systems ## * | Charlston Comorbidity Index ## * | Hospital Anxiety and Depression Scale ## * | Geriatric Depression Scale; Profile of Mood States; Abbreviated Mental Test Score; Barthel Index ## * |
| 3) <u>Non-Response rate</u><br>a) same rate for both groups *<br>b) non respondents described<br>c) rate different and no designation                                                                                                                                    | *                                    | *                                                                                                             | *                                                                     | *                                                                     |                                  |                                            | *                                                                                                     |

**Cohort studies (1)**

| Selection                                                                                                                                                                                                                                                                                                                      | Croft (2015)                 | Day (2011) a                               | Day (2011) b    | Day (2012)                       | Day (2013)                                  | Evans (2003)                   | Findink (2012)                             | Guilley (2017)                     |
|--------------------------------------------------------------------------------------------------------------------------------------------------------------------------------------------------------------------------------------------------------------------------------------------------------------------------------|------------------------------|--------------------------------------------|-----------------|----------------------------------|---------------------------------------------|--------------------------------|--------------------------------------------|------------------------------------|
| 1) <u>Representativeness of the exposed cohort</u><br>a) truly representative of the average patient in the community *<br>b) somewhat representative of the average patient in the community *<br>c) selected group of users eg nurses, volunteers<br>d) no description of the derivation of the cohort                       | *                            | *                                          | *               | *                                | * b                                         | c                              | *b                                         | *b                                 |
| 2) <u>Selection of the non exposed cohort</u><br>a) drawn from the same community as the exposed cohort *<br>b) drawn from a different source<br>c) no description of the derivation of the non exposed cohort                                                                                                                 | *                            | *                                          | *               | *                                | *                                           | *                              | *                                          | *                                  |
| 3) <u>Ascertainment of exposure</u><br>a) secure record (eg surgical records) *<br>b) structured interview *<br>c) written self report<br>d) no description                                                                                                                                                                    | *                            | *                                          | *               | *                                | *                                           | *                              | *                                          | *                                  |
| 4) <u>Demonstration that outcome of interest was not present at start of study</u><br>a) yes *<br>b) no                                                                                                                                                                                                                        | *                            | b                                          | b               | *                                | *                                           | *                              |                                            | *                                  |
| <b>Comparability</b>                                                                                                                                                                                                                                                                                                           |                              |                                            |                 |                                  |                                             |                                |                                            |                                    |
| 1) Comparability of cohorts on the basis of the design or analysis<br>a) study controls for diagnosis *<br>b) study controls for any additional factor *                                                                                                                                                                       | *<br>*<br>(l,g)              |                                            | *<br>*<br>(l,g) | *<br>*<br>(l,g)                  | *<br>*<br>(l,g)                             |                                |                                            | * (g)                              |
| <b>Outcome</b>                                                                                                                                                                                                                                                                                                                 |                              |                                            |                 |                                  |                                             |                                |                                            |                                    |
| 1) <u>Assessment of outcome</u><br>a) independent blind assessment *<br>b) record linkage *<br>c) self report<br>d) no description                                                                                                                                                                                             | Global Trigger Tool<br>### * | Hospital Anxiety and Depression Scale ## * | *               | Clinical diagnosis of delirium * | Hospital Anxiety and Depression Scale ### * | Clinical encounters per hour * | Hospital Anxiety and Depression Scale ## * | State-Trait Anxiety Inventory ## * |
| 2) <u>Was follow-up long enough for outcomes to occur</u><br>a) yes (during hospitalisation or immediately afterwards) *<br>b) no                                                                                                                                                                                              | *                            | *                                          | *               | *                                | * 3 days                                    | *                              | *                                          |                                    |
| 3) <u>Adequacy of follow up of cohorts</u><br>a) complete follow up - all subjects accounted for *<br>b) subjects lost to follow up unlikely to introduce bias - small number lost - > 90 % follow up, or description provided of those lost) *<br>c) follow up rate < 90% and no description of those lost<br>d) no statement | *                            | *                                          | *               | *                                | *                                           | *                              | *                                          | *                                  |

Community – was hospital population  
Time to outcome of interest – question is regarding outcome during isolation

a – age  
g- gender  
l – LOS

# own scale  
## validated scale/s used appropriately

## Cohort studies (2)

| Selection                                                                                                                                                                                                                                                                                                                      | Kirkland (1999) | Lau (2016)                                                                   | Mehotra (2013)                                                           | Stelfox (2003)               | Spense (2011)       | Saint (2003)             | Tran (2016)         | Wassenberg (2010)                                 |
|--------------------------------------------------------------------------------------------------------------------------------------------------------------------------------------------------------------------------------------------------------------------------------------------------------------------------------|-----------------|------------------------------------------------------------------------------|--------------------------------------------------------------------------|------------------------------|---------------------|--------------------------|---------------------|---------------------------------------------------|
| 1) <u>Representativeness of the exposed cohort</u><br>a) truly representative of the average patient in the community *<br>b) somewhat representative of the average patient in the community *<br>c) selected group of users eg nurses, volunteers<br>d) no description of the derivation of the cohort                       | *b              | *                                                                            | *                                                                        | *                            | b                   | *                        | *                   | *                                                 |
| 2) <u>Selection of the non exposed cohort</u><br>a) drawn from the same community as the exposed cohort *<br>b) drawn from a different source<br>c) no description of the derivation of the non exposed cohort                                                                                                                 | *               | *                                                                            | *                                                                        | *                            | *                   | *                        | *                   | *                                                 |
| 3) <u>Ascertainment of exposure</u><br>a) secure record (eg surgical records) *<br>b) structured interview *<br>c) written self report<br>d) no description                                                                                                                                                                    | *               | *b                                                                           | *b                                                                       | *                            | *                   | *                        | *                   | *                                                 |
| 4) <u>Demonstration that outcome of interest was not present at start of study</u><br>a) yes *<br>b) no                                                                                                                                                                                                                        | *               | *                                                                            | *                                                                        | *                            | *                   | *                        | *                   | *                                                 |
| <b>Comparability</b>                                                                                                                                                                                                                                                                                                           |                 |                                                                              |                                                                          |                              |                     |                          |                     |                                                   |
| 1) Comparability of cohorts on the basis of the design or analysis<br>a) study controls for diagnosis *<br>b) study controls for any additional factor *                                                                                                                                                                       |                 | * (g)                                                                        | *<br>* (l,g)                                                             | *<br>* (l,g)                 |                     | *                        | *<br>* (l,g)        | (l,g)                                             |
| <b>Outcome</b>                                                                                                                                                                                                                                                                                                                 |                 |                                                                              |                                                                          |                              |                     |                          |                     |                                                   |
| 1) <u>Assessment of outcome</u><br>a) independent blind assessment *<br>b) record linkage *<br>c) self report<br>d) no description                                                                                                                                                                                             | *<br>#          | Patient Health Questionnaire-9; CQ-5D<br>c telephone /health records<br>## * | Hospital Consumer Assessment of Healthcare Providers and Systems<br>## * | Clinical satisfaction<br># * | Clinical outcomes * | Observation of doctors * | Clinical outcomes * | EQ5-D; Hospital Anxiety and Depression Scale ## * |
| 2) <u>Was follow-up long enough for outcomes to occur</u><br>a) yes (during hospitalisation or immediately afterwards) *<br>b) no                                                                                                                                                                                              | *               |                                                                              | *                                                                        | *                            | *                   | *                        | *                   | *                                                 |
| 3) <u>Adequacy of follow up of cohorts</u><br>a) complete follow up - all subjects accounted for *<br>b) subjects lost to follow up unlikely to introduce bias - small number lost - > 90 % follow up, or description provided of those lost) *<br>c) follow up rate < 90% and no description of those lost<br>d) no statement | *               |                                                                              | 37/278 contact;<br>51/290 non                                            | *                            | *                   |                          | *                   | *                                                 |

## General notes

Community – the population of interest was a hospital population

Time to outcome of interest – question is regarding outcome during isolation or shortly afterwards





# PRISMA 2009 Checklist

1  
2  
3  
4  
5  
6  
7  
8  
9  
10  
11  
12  
13  
14  
15  
16  
17  
18  
19  
20  
21  
22  
23  
24  
25  
26  
27  
28  
29  
30  
31  
32  
33  
34  
35  
36  
37  
38  
39  
40  
41  
42  
43  
44  
45  
46  
47

| Section/topic                      | #  | Checklist item                                                                                                                                                                                                                                                                                              | Reported on page # |
|------------------------------------|----|-------------------------------------------------------------------------------------------------------------------------------------------------------------------------------------------------------------------------------------------------------------------------------------------------------------|--------------------|
| <b>TITLE</b>                       |    |                                                                                                                                                                                                                                                                                                             |                    |
| Title                              | 1  | Identify the report as a systematic review, meta-analysis, or both.                                                                                                                                                                                                                                         | 1                  |
| <b>ABSTRACT</b>                    |    |                                                                                                                                                                                                                                                                                                             |                    |
| Structured summary                 | 2  | Provide a structured summary including, as applicable: background; objectives; data sources; study eligibility criteria, participants, and interventions; study appraisal and synthesis methods; results; limitations; conclusions and implications of key findings; systematic review registration number. | 1-2                |
| <b>INTRODUCTION</b>                |    |                                                                                                                                                                                                                                                                                                             |                    |
| Rationale                          | 3  | Describe the rationale for the review in the context of what is already known.                                                                                                                                                                                                                              | 3                  |
| Objectives                         | 4  | Provide an explicit statement of questions being addressed with reference to participants, interventions, comparisons, outcomes, and study design (PICOS).                                                                                                                                                  | 4-5                |
| <b>METHODS</b>                     |    |                                                                                                                                                                                                                                                                                                             |                    |
| Protocol and registration          | 5  | Indicate if a review protocol exists, if and where it can be accessed (e.g., Web address), and, if available, provide registration information including registration number.                                                                                                                               | 5                  |
| Eligibility criteria               | 6  | Specify study characteristics (e.g., PICOS, length of follow-up) and report characteristics (e.g., years considered, language, publication status) used as criteria for eligibility, giving rationale.                                                                                                      | 5                  |
| Information sources                | 7  | Describe all information sources (e.g., databases with dates of coverage, contact with study authors to identify additional studies) in the search and date last searched.                                                                                                                                  | 5                  |
| Search                             | 8  | Present full electronic search strategy for at least one database, including any limits used, such that it could be repeated.                                                                                                                                                                               | Suppl information  |
| Study selection                    | 9  | State the process for selecting studies (i.e., screening, eligibility, included in systematic review, and, if applicable, included in the meta-analysis).                                                                                                                                                   | 5                  |
| Data collection process            | 10 | Describe method of data extraction from reports (e.g., piloted forms, independently, in duplicate) and any processes for obtaining and confirming data from investigators.                                                                                                                                  | 5                  |
| Data items                         | 11 | List and define all variables for which data were sought (e.g., PICOS, funding sources) and any assumptions and simplifications made.                                                                                                                                                                       | 5                  |
| Risk of bias in individual studies | 12 | Describe methods used for assessing risk of bias of individual studies (including specification of whether this was done at the study or outcome level), and how this information is to be used in any data synthesis.                                                                                      | 7                  |
| Summary measures                   | 13 | State the principal summary measures (e.g., risk ratio, difference in means).                                                                                                                                                                                                                               | 6-7                |
| Synthesis of results               | 14 | Describe the methods of handling data and combining results of studies, if done, including measures of consistency (e.g., I <sup>2</sup> ) for each meta-analysis.                                                                                                                                          | 6-7                |

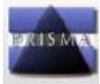

# PRISMA 2009 Checklist

1  
2  
3  
4  
5  
6  
7  
8  
9  
10  
11  
12  
13  
14  
15  
16  
17  
18  
19  
20  
21  
22  
23  
24  
25  
26  
27  
28  
29  
30  
31  
32  
33  
34  
35  
36  
37  
38  
39  
40  
41  
42  
43  
44  
45  
46  
47

| Section/topic                 | #  | Checklist item                                                                                                                                                                                           | Reported on page # |
|-------------------------------|----|----------------------------------------------------------------------------------------------------------------------------------------------------------------------------------------------------------|--------------------|
| Risk of bias across studies   | 15 | Specify any assessment of risk of bias that may affect the cumulative evidence (e.g., publication bias, selective reporting within studies).                                                             | 7-8                |
| Additional analyses           | 16 | Describe methods of additional analyses (e.g., sensitivity or subgroup analyses, meta-regression), if done, indicating which were pre-specified.                                                         | None               |
| <b>RESULTS</b>                |    |                                                                                                                                                                                                          |                    |
| Study selection               | 17 | Give numbers of studies screened, assessed for eligibility, and included in the review, with reasons for exclusions at each stage, ideally with a flow diagram.                                          | 6                  |
| Study characteristics         | 18 | For each study, present characteristics for which data were extracted (e.g., study size, PICOS, follow-up period) and provide the citations.                                                             | Suppl information  |
| Risk of bias within studies   | 19 | Present data on risk of bias of each study and, if available, any outcome level assessment (see item 12).                                                                                                | Suppl information  |
| Results of individual studies | 20 | For all outcomes considered (benefits or harms), present, for each study: (a) simple summary data for each intervention group (b) effect estimates and confidence intervals, ideally with a forest plot. | Figures            |
| Synthesis of results          | 21 | Present results of each meta-analysis done, including confidence intervals and measures of consistency.                                                                                                  | None               |
| Risk of bias across studies   | 22 | Present results of any assessment of risk of bias across studies (see Item 15).                                                                                                                          | 8-9                |
| Additional analysis           | 23 | Give results of additional analyses, if done (e.g., sensitivity or subgroup analyses, meta-regression [see Item 16]).                                                                                    | None               |
| <b>DISCUSSION</b>             |    |                                                                                                                                                                                                          |                    |
| Summary of evidence           | 24 | Summarize the main findings including the strength of evidence for each main outcome; consider their relevance to key groups (e.g., healthcare providers, users, and policy makers).                     | 8-11               |
| Limitations                   | 25 | Discuss limitations at study and outcome level (e.g., risk of bias), and at review-level (e.g., incomplete retrieval of identified research, reporting bias).                                            | 14                 |
| Conclusions                   | 26 | Provide a general interpretation of the results in the context of other evidence, and implications for future research.                                                                                  | 14                 |
| <b>FUNDING</b>                |    |                                                                                                                                                                                                          |                    |
| Funding                       | 27 | Describe sources of funding for the systematic review and other support (e.g., supply of data); role of funders for the systematic review.                                                               | None               |

From: Moher D, Liberati A, Tetzlaff J, Altman DG, The PRISMA Group (2009). Preferred Reporting Items for Systematic Reviews and Meta-Analyses: The PRISMA Statement. PLoS Med 6(7): e1000097. doi:10.1371/journal.pmed1000097

For more information, visit: [www.prisma-statement.org](http://www.prisma-statement.org).

For peer review only - <http://bmjopen.bmj.com/site/about/guidelines.xhtml>
