# Supplementary material for: Impact of isolation on hospitalised patients who are infectious: systematic review with meta-analysis
Source: PubMed Central journal article supplement — BMJ Open. 2020 Feb 18;10(2):e030371. doi: 10.1136/bmjopen-2019-030371 (PMC7044903; doi:10.1136/bmjopen-2019-030371), 2020-02-18
Supplement: bmjopen-2019-030371supp006.pdf [file bmjopen-2019-030371supp006.pdf]

**Case-control studies**

|                                                                                                                                                                                                                                                                          | Colorado (2014)                      | Kennedy (1997)                                                                                                | Livorsi (2015)                                                        | Lupion (2015)                                                         | Masse (2013)                     | Soon (2013)                                | Tarzi (2001)                                                                                          |
|--------------------------------------------------------------------------------------------------------------------------------------------------------------------------------------------------------------------------------------------------------------------------|--------------------------------------|---------------------------------------------------------------------------------------------------------------|-----------------------------------------------------------------------|-----------------------------------------------------------------------|----------------------------------|--------------------------------------------|-------------------------------------------------------------------------------------------------------|
| 1) <u>Is the case definition adequate?</u><br>a) yes, with independent validation *<br>b) yes, eg record linkage or based on self reports<br>c) no description                                                                                                           | *                                    | *                                                                                                             | *                                                                     | *                                                                     | *                                | *                                          | *                                                                                                     |
| 2) <u>Representativeness of the cases</u><br>a) consecutive or obviously representative series of cases *<br>b) potential for selection biases or not stated                                                                                                             | b                                    | b                                                                                                             | *                                                                     | b                                                                     | b                                | *                                          | *                                                                                                     |
| 3) <u>Selection of Controls</u><br>a) community controls (studies of hospital patients) *<br>b) hospital controls<br>c) no description                                                                                                                                   | *                                    | *                                                                                                             | *                                                                     | *                                                                     | *                                | *                                          | *                                                                                                     |
| 4) <u>Definition of Controls</u><br>a) no history of disease (endpoint) *<br>b) no description of source                                                                                                                                                                 | *                                    |                                                                                                               |                                                                       | *                                                                     |                                  |                                            |                                                                                                       |
| <b>Comparability</b>                                                                                                                                                                                                                                                     |                                      |                                                                                                               |                                                                       |                                                                       |                                  |                                            |                                                                                                       |
| 1) <u>Comparability of cases and controls on the basis of the design or analysis</u><br>a) study controls for diagnosis *<br>b) study controls for any additional factor *                                                                                               | *<br>* (l)                           | *<br>* (l, g)                                                                                                 |                                                                       | *<br>* (g)                                                            | *<br>*(g)                        | *<br>* (l, g)                              | *<br>*(l, g)                                                                                          |
| <b>Outcome</b>                                                                                                                                                                                                                                                           |                                      |                                                                                                               |                                                                       |                                                                       |                                  |                                            |                                                                                                       |
| 1) <u>Ascertainment of exposure</u><br>a) secure record (eg surgical records) *<br>b) structured interview where blind to case/control status *<br>c) interview not blinded to case/control status<br>d) written self report or medical record only<br>e) no description | *                                    | *                                                                                                             | *                                                                     | *                                                                     | *                                | *                                          | *                                                                                                     |
| 2) <u>Same method of ascertainment for cases and controls</u><br>a) yes *<br>b) no                                                                                                                                                                                       | Functional Independence Measure ## * | Functional Independence Measure; Beck Inventory Depression; State Anxiety Inventory; Profile Mood States ## * | Hospital Consumer Assessment of Healthcare Providers and Systems ## * | Hospital Consumer Assessment of Healthcare Providers and Systems ## * | Charlston Comorbidity Index ## * | Hospital Anxiety and Depression Scale ## * | Geriatric Depression Scale; Profile of Mood States; Abbreviated Mental Test Score; Barthel Index ## * |
| 3) <u>Non-Response rate</u><br>a) same rate for both groups *<br>b) non respondents described<br>c) rate different and no designation                                                                                                                                    | *                                    | *                                                                                                             | *                                                                     | *                                                                     |                                  |                                            | *                                                                                                     |

## Cohort studies (1)

| Selection                                                                                                                                                                                                                                                                                                                      | Croft (2015)             | Day (2011) a                               | Day (2011) b    | Day (2012)                       | Day (2013)                                 | Evans (2003)                   | Findink (2012)                             | Guilley (2017)                     |
|--------------------------------------------------------------------------------------------------------------------------------------------------------------------------------------------------------------------------------------------------------------------------------------------------------------------------------|--------------------------|--------------------------------------------|-----------------|----------------------------------|--------------------------------------------|--------------------------------|--------------------------------------------|------------------------------------|
| 1) <u>Representativeness of the exposed cohort</u><br>a) truly representative of the average patient in the community *<br>b) somewhat representative of the average patient in the community *<br>c) selected group of users eg nurses, volunteers<br>d) no description of the derivation of the cohort                       | *                        | *                                          | *               | *                                | * b                                        | c                              | *b                                         | *b                                 |
| 2) <u>Selection of the non exposed cohort</u><br>a) drawn from the same community as the exposed cohort *<br>b) drawn from a different source<br>c) no description of the derivation of the non exposed cohort                                                                                                                 | *                        | *                                          | *               | *                                | *                                          | *                              | *                                          | *                                  |
| 3) <u>Ascertainment of exposure</u><br>a) secure record (eg surgical records) *<br>b) structured interview *<br>c) written self report<br>d) no description                                                                                                                                                                    | *                        | *                                          | *               | *                                | *                                          | *                              | *                                          | *                                  |
| 4) <u>Demonstration that outcome of interest was not present at start of study</u><br>a) yes *<br>b) no                                                                                                                                                                                                                        | *                        | b                                          | b               | *                                | *                                          | *                              |                                            | *                                  |
| <b>Comparability</b>                                                                                                                                                                                                                                                                                                           |                          |                                            |                 |                                  |                                            |                                |                                            |                                    |
| 1) Comparability of cohorts on the basis of the design or analysis<br>a) study controls for diagnosis *<br>b) study controls for any additional factor *                                                                                                                                                                       | *<br>*<br>(l,g)          |                                            | *<br>*<br>(l,g) | *<br>*<br>(l,g)                  | *<br>*<br>(l,g)                            |                                |                                            | * (g)                              |
| <b>Outcome</b>                                                                                                                                                                                                                                                                                                                 |                          |                                            |                 |                                  |                                            |                                |                                            |                                    |
| 1) <u>Assessment of outcome</u><br>a) independent blind assessment *<br>b) record linkage *<br>c) self report<br>d) no description                                                                                                                                                                                             | Global Trigger Tool ## * | Hospital Anxiety and Depression Scale ## * | *               | Clinical diagnosis of delirium * | Hospital Anxiety and Depression Scale ## * | Clinical encounters per hour * | Hospital Anxiety and Depression Scale ## * | State-Trait Anxiety Inventory ## * |
| 2) <u>Was follow-up long enough for outcomes to occur</u><br>a) yes (during hospitalisation or immediately afterwards) *<br>b) no                                                                                                                                                                                              | *                        | *                                          | *               | *                                | * 3 days                                   | *                              | *                                          |                                    |
| 3) <u>Adequacy of follow up of cohorts</u><br>a) complete follow up - all subjects accounted for *<br>b) subjects lost to follow up unlikely to introduce bias - small number lost - > 90 % follow up, or description provided of those lost) *<br>c) follow up rate < 90% and no description of those lost<br>d) no statement | *                        | *                                          | *               | *                                | *                                          | *                              | *                                          | *                                  |

Community – was hospital population

Time to outcome of interest – question is regarding outcome during isolation

a – age

g- gender

l – LOS

# own scale

## validated scale/s used appropriately

## Cohort studies (2)

| Selection                                                                                                                                                                                                                                                                                                                      | Kirkland (1999) | Lau (2016)                                                                   | Mehotra (2013)                                                           | Stelfox (2003)               | Spense (2011)       | Saint (2003)             | Tran (2016)         | Wassenberg (2010)                                 |
|--------------------------------------------------------------------------------------------------------------------------------------------------------------------------------------------------------------------------------------------------------------------------------------------------------------------------------|-----------------|------------------------------------------------------------------------------|--------------------------------------------------------------------------|------------------------------|---------------------|--------------------------|---------------------|---------------------------------------------------|
| 1) <u>Representativeness of the exposed cohort</u><br>a) truly representative of the average patient in the community *<br>b) somewhat representative of the average patient in the community *<br>c) selected group of users eg nurses, volunteers<br>d) no description of the derivation of the cohort                       | *b              | *                                                                            | *                                                                        | *                            | b                   | *                        | *                   | *                                                 |
| 2) <u>Selection of the non exposed cohort</u><br>a) drawn from the same community as the exposed cohort *<br>b) drawn from a different source<br>c) no description of the derivation of the non exposed cohort                                                                                                                 | *               | *                                                                            | *                                                                        | *                            | *                   | *                        | *                   | *                                                 |
| 3) <u>Ascertainment of exposure</u><br>a) secure record (eg surgical records) *<br>b) structured interview *<br>c) written self report<br>d) no description                                                                                                                                                                    | *               | *b                                                                           | *b                                                                       | *                            | *                   | *                        | *                   | *                                                 |
| 4) <u>Demonstration that outcome of interest was not present at start of study</u><br>a) yes *<br>b) no                                                                                                                                                                                                                        | *               | *                                                                            | *                                                                        | *                            | *                   | *                        | *                   | *                                                 |
| <b>Comparability</b>                                                                                                                                                                                                                                                                                                           |                 |                                                                              |                                                                          |                              |                     |                          |                     |                                                   |
| 1) Comparability of cohorts on the basis of the design or analysis<br>a) study controls for diagnosis *<br>b) study controls for any additional factor *                                                                                                                                                                       |                 | * (g)                                                                        | *<br>* (l,g)                                                             | *<br>* (l,g)                 |                     | *                        | *<br>* (l,g)        | (l,g)                                             |
| <b>Outcome</b>                                                                                                                                                                                                                                                                                                                 |                 |                                                                              |                                                                          |                              |                     |                          |                     |                                                   |
| 1) <u>Assessment of outcome</u><br>a) independent blind assessment *<br>b) record linkage *<br>c) self report<br>d) no description                                                                                                                                                                                             | *<br>#          | Patient Health Questionnaire-9; CQ-5D<br>c telephone /health records<br>## * | Hospital Consumer Assessment of Healthcare Providers and Systems<br>## * | Clinical satisfaction<br># * | Clinical outcomes * | Observation of doctors * | Clinical outcomes * | EQ5-D; Hospital Anxiety and Depression Scale ## * |
| 2) <u>Was follow-up long enough for outcomes to occur</u><br>a) yes (during hospitalisation or immediately afterwards) *<br>b) no                                                                                                                                                                                              | *               |                                                                              | *                                                                        | *                            | *                   | *                        | *                   | *                                                 |
| 3) <u>Adequacy of follow up of cohorts</u><br>a) complete follow up - all subjects accounted for *<br>b) subjects lost to follow up unlikely to introduce bias - small number lost - > 90 % follow up, or description provided of those lost) *<br>c) follow up rate < 90% and no description of those lost<br>d) no statement | *               |                                                                              | 37/278 contact;<br>51/290 non                                            | *                            | *                   |                          | *                   | *                                                 |

## General notes

Community – the population of interest was a hospital population

Time to outcome of interest – question is regarding outcome during isolation or shortly afterwards
